# Supplementary material for: Associations of indoor airborne microbiome with lung function: evidence from a randomized, double-blind, crossover study of microbial intervention
Source: Royal Society of Chemistry journal article supplement (doi:10.1039/d4em00392f), 2024-01-01
Supplement: d4em00392f1.pdf [file d4em00392f1.pdf]

## Supplementary Information

### Associations of indoor airborne microbiome with lung function: Evidence from a randomized, double-blind, crossover study of microbial intervention

Yetong Zhao <sup>a</sup>, Shan Liu <sup>a</sup>, Wanzhou Wang <sup>a</sup>, Luyi Li <sup>a</sup>, Wenlou Zhang <sup>a</sup>, Xuezhao Ji <sup>a</sup>, Di Yang <sup>a</sup>,  
Xinbiao Guo <sup>a\*</sup>, Furong Deng <sup>a,b\*</sup>

#### Author Affiliations:

<sup>a</sup> Department of Occupational and Environmental Health Sciences, School of Public Health, Peking University, Beijing 100191, China

<sup>b</sup> Center for Environment and Health, Academy for Advanced Interdisciplinary Studies, Peking University, Beijing 100191, China

#### \* Correspondence to:

Xinbiao Guo,

Department of Occupational and Environmental Health Sciences, School of Public Health, Peking University, Beijing 100191, China

E-mail: [guoxb@bjmu.edu.cn](mailto:guoxb@bjmu.edu.cn).

Furong Deng,

Department of Occupational and Environmental Health Sciences, School of Public Health, Peking University, Beijing 100191, China

E-mail: [lotus321321@126.com](mailto:lotus321321@126.com).

### **Supplementary Tables**

**Table S1.** Description of microbial richness in the major taxonomic class level.

**Table S2.** All results of associations between indoor airborne microbial richness (represented as the number of ASVs) and lung function measures.

**Table S3.** Description of absolute abundance of the high-abundant microbial genera.

**Table S4.** All results of associations between indoor airborne microbial absolute abundance and lung function measures.

**Table S5.** All results of associations between indoor airborne microbial relative abundance and lung function measures.

### **Supplementary Figures**

**Fig. S1.** Linear discriminant analysis (LDA) effect size (LEfSe) analysis on indoor airborne microbiome between the female and male dormitories.

**Table S1.** Description of microbial richness in the major taxonomic class level.

| Taxon                                             | All              | Sham-purification | Real-purification   | <i>p</i> -Value      |
|---------------------------------------------------|------------------|-------------------|---------------------|----------------------|
| d_Bacteria;p_Actinobacteria;c_Actinobacteria      | 14 (6.75, 48)    | 23 (11, 55.25)    | 8.5 (5, 16)         | 5.0×10 <sup>-2</sup> |
| d_Bacteria;p_Bacteroidetes;c_Bacteroidia          | 7 (2, 11)        | 8.5 (3.75, 14.5)  | 6 (2, 7.25)         | 3.4×10 <sup>-2</sup> |
| d_Bacteria;p_Cyanobacteria;c_Oxyphotobacteria     | 4.5 (1, 9)       | 6 (1.75, 12)      | 3 (0.75, 6.5)       | 1.4×10 <sup>-2</sup> |
| d_Bacteria;p_Firmicutes;c_Bacilli                 | 9 (3.75, 21.5)   | 12 (6, 29.75)     | 5 (2, 12.5)         | 9.0×10 <sup>-2</sup> |
| d_Bacteria;p_Firmicutes;c_Clostridia              | 1.5 (0, 5)       | 4.5 (1.75, 7)     | 0.5 (0, 1.25)       | 2.5×10 <sup>-2</sup> |
| d_Bacteria;p_Proteobacteria;c_Alphaproteobacteria | 17.5 (12, 36.5)  | 27 (15, 39.25)    | 15 (8.75, 22.25)    | 9.5×10 <sup>-2</sup> |
| d_Bacteria;p_Proteobacteria;c_Gammaproteobacteria | 33 (23.5, 51.75) | 33 (29.75, 58.25) | 33.5 (18.75, 42.75) | 1.8×10 <sup>-1</sup> |
| d_Fungi;p_Ascomycota;c_Dothideomycetes            | 4 (2, 12.5)      | 8.5 (2, 16.5)     | 2 (1, 7.5)          | 9.1×10 <sup>-2</sup> |
| d_Fungi;p_Ascomycota;c_Eurotiomycetes             | 4 (1, 12.5)      | 7 (2, 17.25)      | 2.5 (0.75, 6.25)    | 4.4×10 <sup>-2</sup> |
| d_Fungi;p_Ascomycota;c_Sordariomycetes            | 2 (1, 8.25)      | 4 (1, 9)          | 2 (1, 4)            | 3.5×10 <sup>-1</sup> |
| d_Fungi;p_Basidiomycota;c_Agaricomycetes          | 1 (0, 4)         | 1 (0, 4)          | 1 (0, 2.5)          | 8.6×10 <sup>-1</sup> |

Note: The data were present by median (P25, P75). The major taxonomic class was defined as microbial class with a total number of ASVs > 100 among all samples. In total, 7 bacterial classes and 4 fungal classes were identified. The *p*-value was the result of the difference between sham and real air purification using Wilcoxon signed-rank test.

**Table S2.** All results of associations between indoor airborne microbial richness (represented as the number of ASVs) and lung function measures.

| Taxon                                             | Lung function measures | Percentage changes (95% CIs) | p-Value              |
|---------------------------------------------------|------------------------|------------------------------|----------------------|
| d_Bacteria;p_Actinobacteria;c_Actinobacteria      | FVC                    | 3.92 (0.43, 7.53)            | 3.1×10 <sup>-2</sup> |
| d_Bacteria;p_Actinobacteria;c_Actinobacteria      | FEV <sub>1</sub>       | 4.6 (1.8, 7.49)              | 1.9×10 <sup>-3</sup> |
| d_Bacteria;p_Actinobacteria;c_Actinobacteria      | FEV <sub>1</sub> /FVC  | 0.37 (-2.33, 3.15)           | 7.9×10 <sup>-1</sup> |
| d_Bacteria;p_Actinobacteria;c_Actinobacteria      | PEF                    | 1.21 (-6.36, 9.39)           | 7.6×10 <sup>-1</sup> |
| d_Bacteria;p_Actinobacteria;c_Actinobacteria      | FEF <sub>25-75</sub>   | 2.13 (-6.06, 11.03)          | 6.2×10 <sup>-1</sup> |
| d_Bacteria;p_Actinobacteria;c_Actinobacteria      | FEF <sub>25</sub>      | 0.58 (-7.14, 8.94)           | 8.9×10 <sup>-1</sup> |
| d_Bacteria;p_Actinobacteria;c_Actinobacteria      | FEF <sub>50</sub>      | 1.81 (-6.83, 11.26)          | 6.9×10 <sup>-1</sup> |
| d_Bacteria;p_Actinobacteria;c_Actinobacteria      | FEF <sub>75</sub>      | 3.27 (-7.21, 14.92)          | 5.6×10 <sup>-1</sup> |
| d_Bacteria;p_Bacteroidetes;c_Bacteroidia          | FVC                    | 6.16 (-1.21, 14.09)          | 1.1×10 <sup>-1</sup> |
| d_Bacteria;p_Bacteroidetes;c_Bacteroidia          | FEV <sub>1</sub>       | 7.83 (1.66, 14.38)           | 1.4×10 <sup>-2</sup> |
| d_Bacteria;p_Bacteroidetes;c_Bacteroidia          | FEV <sub>1</sub> /FVC  | 1.06 (-4.36, 6.8)            | 7.1×10 <sup>-1</sup> |
| d_Bacteria;p_Bacteroidetes;c_Bacteroidia          | PEF                    | 0.53 (-14.3, 17.92)          | 9.5×10 <sup>-1</sup> |
| d_Bacteria;p_Bacteroidetes;c_Bacteroidia          | FEF <sub>25-75</sub>   | -1.11 (-16.61, 17.27)        | 9.0×10 <sup>-1</sup> |
| d_Bacteria;p_Bacteroidetes;c_Bacteroidia          | FEF <sub>25</sub>      | 0.23 (-14.99, 18.19)         | 9.8×10 <sup>-1</sup> |
| d_Bacteria;p_Bacteroidetes;c_Bacteroidia          | FEF <sub>50</sub>      | -1.99 (-18.17, 17.38)        | 8.3×10 <sup>-1</sup> |
| d_Bacteria;p_Bacteroidetes;c_Bacteroidia          | FEF <sub>75</sub>      | -0.09 (-19.53, 24.04)        | 9.9×10 <sup>-1</sup> |
| d_Bacteria;p_Cyanobacteria;c_Oxyphotobacteria     | FVC                    | 9.4 (-2.11, 22.26)           | 1.2×10 <sup>-1</sup> |
| d_Bacteria;p_Cyanobacteria;c_Oxyphotobacteria     | FEV <sub>1</sub>       | 13.23 (3.72, 23.62)          | 7.3×10 <sup>-3</sup> |
| d_Bacteria;p_Cyanobacteria;c_Oxyphotobacteria     | FEV <sub>1</sub> /FVC  | 2.48 (-6.21, 11.98)          | 5.9×10 <sup>-1</sup> |
| d_Bacteria;p_Cyanobacteria;c_Oxyphotobacteria     | PEF                    | 5.65 (-17.72, 35.67)         | 6.7×10 <sup>-1</sup> |
| d_Bacteria;p_Cyanobacteria;c_Oxyphotobacteria     | FEF <sub>25-75</sub>   | 1.12 (-22.83, 32.52)         | 9.4×10 <sup>-1</sup> |
| d_Bacteria;p_Cyanobacteria;c_Oxyphotobacteria     | FEF <sub>25</sub>      | 5.44 (-18.38, 36.2)          | 6.9×10 <sup>-1</sup> |
| d_Bacteria;p_Cyanobacteria;c_Oxyphotobacteria     | FEF <sub>50</sub>      | -0.46 (-25.31, 32.67)        | 9.8×10 <sup>-1</sup> |
| d_Bacteria;p_Cyanobacteria;c_Oxyphotobacteria     | FEF <sub>75</sub>      | 0.8 (-28.8, 42.68)           | 9.6×10 <sup>-1</sup> |
| d_Bacteria;p_Firmicutes;c_Bacilli                 | FVC                    | 7.27 (-1.56, 16.88)          | 1.1×10 <sup>-1</sup> |
| d_Bacteria;p_Firmicutes;c_Bacilli                 | FEV <sub>1</sub>       | 11.29 (4.08, 19)             | 2.6×10 <sup>-3</sup> |
| d_Bacteria;p_Firmicutes;c_Bacilli                 | FEV <sub>1</sub> /FVC  | 3.28 (-3.51, 10.55)          | 3.6×10 <sup>-1</sup> |
| d_Bacteria;p_Firmicutes;c_Bacilli                 | PEF                    | 12.46 (-7.05, 36.06)         | 2.3×10 <sup>-1</sup> |
| d_Bacteria;p_Firmicutes;c_Bacilli                 | FEF <sub>25-75</sub>   | 11.36 (-9.48, 36.99)         | 3.1×10 <sup>-1</sup> |
| d_Bacteria;p_Firmicutes;c_Bacilli                 | FEF <sub>25</sub>      | 10.26 (-9.36, 34.12)         | 3.3×10 <sup>-1</sup> |
| d_Bacteria;p_Firmicutes;c_Bacilli                 | FEF <sub>50</sub>      | 9.51 (-12.15, 36.51)         | 4.2×10 <sup>-1</sup> |
| d_Bacteria;p_Firmicutes;c_Bacilli                 | FEF <sub>75</sub>      | 14.05 (-12.65, 48.91)        | 3.4×10 <sup>-1</sup> |
| d_Bacteria;p_Firmicutes;c_Clostridia              | FVC                    | 4.67 (-3.15, 13.12)          | 2.5×10 <sup>-1</sup> |
| d_Bacteria;p_Firmicutes;c_Clostridia              | FEV <sub>1</sub>       | 9.39 (2.83, 16.36)           | 5.9×10 <sup>-3</sup> |
| d_Bacteria;p_Firmicutes;c_Clostridia              | FEV <sub>1</sub> /FVC  | 3.69 (-2.24, 9.98)           | 2.3×10 <sup>-1</sup> |
| d_Bacteria;p_Firmicutes;c_Clostridia              | PEF                    | 3.11 (-13.07, 22.32)         | 7.3×10 <sup>-1</sup> |
| d_Bacteria;p_Firmicutes;c_Clostridia              | FEF <sub>25-75</sub>   | 6.29 (-11.46, 27.61)         | 5.1×10 <sup>-1</sup> |
| d_Bacteria;p_Firmicutes;c_Clostridia              | FEF <sub>25</sub>      | 1.47 (-14.92, 21.01)         | 8.7×10 <sup>-1</sup> |
| d_Bacteria;p_Firmicutes;c_Clostridia              | FEF <sub>50</sub>      | 5.29 (-13.24, 27.78)         | 6.0×10 <sup>-1</sup> |
| d_Bacteria;p_Firmicutes;c_Clostridia              | FEF <sub>75</sub>      | 11.87 (-11.3, 41.09)         | 3.5×10 <sup>-1</sup> |
| d_Bacteria;p_Proteobacteria;c_Alphaproteobacteria | FVC                    | 3.81 (0.34, 7.4)             | 3.4×10 <sup>-2</sup> |
| d_Bacteria;p_Proteobacteria;c_Alphaproteobacteria | FEV <sub>1</sub>       | 3.47 (0.61, 6.41)            | 2.0×10 <sup>-2</sup> |
| d_Bacteria;p_Proteobacteria;c_Alphaproteobacteria | FEV <sub>1</sub> /FVC  | -0.38 (-3.04, 2.35)          | 7.8×10 <sup>-1</sup> |
| d_Bacteria;p_Proteobacteria;c_Alphaproteobacteria | PEF                    | -1.07 (-8.43, 6.88)          | 7.9×10 <sup>-1</sup> |
| d_Bacteria;p_Proteobacteria;c_Alphaproteobacteria | FEF <sub>25-75</sub>   | -2.14 (-9.92, 6.31)          | 6.1×10 <sup>-1</sup> |
| d_Bacteria;p_Proteobacteria;c_Alphaproteobacteria | FEF <sub>25</sub>      | -1.8 (-9.29, 6.31)           | 6.6×10 <sup>-1</sup> |
| d_Bacteria;p_Proteobacteria;c_Alphaproteobacteria | FEF <sub>50</sub>      | -2.69 (-10.86, 6.24)         | 5.5×10 <sup>-1</sup> |
| d_Bacteria;p_Proteobacteria;c_Alphaproteobacteria | FEF <sub>75</sub>      | -2.24 (-12.06, 8.67)         | 6.8×10 <sup>-1</sup> |
| d_Bacteria;p_Proteobacteria;c_Gammaproteobacteria | FVC                    | 3.05 (0.17, 6.02)            | 4.1×10 <sup>-2</sup> |
| d_Bacteria;p_Proteobacteria;c_Gammaproteobacteria | FEV <sub>1</sub>       | 2.83 (0.47, 5.25)            | 2.2×10 <sup>-2</sup> |
| d_Bacteria;p_Proteobacteria;c_Gammaproteobacteria | FEV <sub>1</sub> /FVC  | -0.18 (-2.41, 2.09)          | 8.7×10 <sup>-1</sup> |
| d_Bacteria;p_Proteobacteria;c_Gammaproteobacteria | PEF                    | -0.25 (-6.42, 6.33)          | 9.4×10 <sup>-1</sup> |
| d_Bacteria;p_Proteobacteria;c_Gammaproteobacteria | FEF <sub>25-75</sub>   | -1.15 (-7.7, 5.88)           | 7.4×10 <sup>-1</sup> |
| d_Bacteria;p_Proteobacteria;c_Gammaproteobacteria | FEF <sub>25</sub>      | -0.4 (-6.72, 6.34)           | 9.0×10 <sup>-1</sup> |
| d_Bacteria;p_Proteobacteria;c_Gammaproteobacteria | FEF <sub>50</sub>      | -1.37 (-8.3, 6.09)           | 7.1×10 <sup>-1</sup> |
| d_Bacteria;p_Proteobacteria;c_Gammaproteobacteria | FEF <sub>75</sub>      | -2.11 (-10.34, 6.87)         | 6.3×10 <sup>-1</sup> |
| d_Fungi;p_Ascmycota;c_Dothideomycetes             | FVC                    | 19.2 (3.55, 37.21)           | 1.7×10 <sup>-2</sup> |
| d_Fungi;p_Ascmycota;c_Dothideomycetes             | FEV <sub>1</sub>       | 6.34 (-5.71, 19.93)          | 3.2×10 <sup>-1</sup> |
| d_Fungi;p_Ascmycota;c_Dothideomycetes             | FEV <sub>1</sub> /FVC  | -10.78 (-20.31, -0.1)        | 5.1×10 <sup>-2</sup> |
| d_Fungi;p_Ascmycota;c_Dothideomycetes             | PEF                    | -24.98 (-45.34, 2.96)        | 7.9×10 <sup>-2</sup> |
| d_Fungi;p_Ascmycota;c_Dothideomycetes             | FEF <sub>25-75</sub>   | -13.99 (-39.39, 22.04)       | 4.0×10 <sup>-1</sup> |
| d_Fungi;p_Ascmycota;c_Dothideomycetes             | FEF <sub>25</sub>      | -19.62 (-42.04, 11.49)       | 2.0×10 <sup>-1</sup> |
| d_Fungi;p_Ascmycota;c_Dothideomycetes             | FEF <sub>50</sub>      | -10.57 (-38.4, 29.83)        | 5.6×10 <sup>-1</sup> |
| d_Fungi;p_Ascmycota;c_Dothideomycetes             | FEF <sub>75</sub>      | -20.53 (-49.36, 24.72)       | 3.2×10 <sup>-1</sup> |
| d_Fungi;p_Ascmycota;c_Eurotiomycetes              | FVC                    | 5.09 (-11.84, 25.26)         | 5.8×10 <sup>-1</sup> |
| d_Fungi;p_Ascmycota;c_Eurotiomycetes              | FEV <sub>1</sub>       | 2.36 (-11.48, 18.37)         | 7.5×10 <sup>-1</sup> |
| d_Fungi;p_Ascmycota;c_Eurotiomycetes              | FEV <sub>1</sub> /FVC  | -1.27 (-13.89, 13.19)        | 8.5×10 <sup>-1</sup> |
| d_Fungi;p_Ascmycota;c_Eurotiomycetes              | PEF                    | 17.4 (-20.2, 72.71)          | 4.2×10 <sup>-1</sup> |
| d_Fungi;p_Ascmycota;c_Eurotiomycetes              | FEF <sub>25-75</sub>   | -6.53 (-38.36, 41.74)        | 7.5×10 <sup>-1</sup> |
| d_Fungi;p_Ascmycota;c_Eurotiomycetes              | FEF <sub>25</sub>      | 4.99 (-29.38, 56.08)         | 8.1×10 <sup>-1</sup> |
| d_Fungi;p_Ascmycota;c_Eurotiomycetes              | FEF <sub>50</sub>      | -6.46 (-39.88, 45.54)        | 7.7×10 <sup>-1</sup> |
| d_Fungi;p_Ascmycota;c_Eurotiomycetes              | FEF <sub>75</sub>      | -14.52 (-49.9, 45.82)        | 5.7×10 <sup>-1</sup> |
| d_Fungi;p_Ascmycota;c_Sordariomycetes             | FVC                    | 41.16 (5.91, 88.14)          | 2.1×10 <sup>-2</sup> |
| d_Fungi;p_Ascmycota;c_Sordariomycetes             | FEV <sub>1</sub>       | 27.49 (0.05, 62.47)          | 5.4×10 <sup>-2</sup> |
| d_Fungi;p_Ascmycota;c_Sordariomycetes             | FEV <sub>1</sub> /FVC  | -9.4 (-27.9, 13.84)          | 4.0×10 <sup>-1</sup> |

|                                          |                       |                        |                      |
|------------------------------------------|-----------------------|------------------------|----------------------|
| d_Fungi:p_Ascomycota;c_Sordariomycetes   | PEF                   | 16.35 (-39.6, 124.11)  | 6.5×10 <sup>-1</sup> |
| d_Fungi:p_Ascomycota;c_Sordariomycetes   | FEF <sub>25-75</sub>  | -15 (-57.87, 71.5)     | 6.5×10 <sup>-1</sup> |
| d_Fungi:p_Ascomycota;c_Sordariomycetes   | FEF <sub>25</sub>     | 10.35 (-43.77, 116.55) | 7.8×10 <sup>-1</sup> |
| d_Fungi:p_Ascomycota;c_Sordariomycetes   | FEF <sub>50</sub>     | -11.42 (-57.97, 86.69) | 7.5×10 <sup>-1</sup> |
| d_Fungi:p_Ascomycota;c_Sordariomycetes   | FEF <sub>75</sub>     | -27.29 (-70.32, 78.11) | 4.9×10 <sup>-1</sup> |
| d_Fungi:p_Basidiomycota;c_Agaricomycetes | FVC                   | -23.62 (-49.86, 16.36) | 2.1×10 <sup>-1</sup> |
| d_Fungi:p_Basidiomycota;c_Agaricomycetes | FEV <sub>1</sub>      | 4.78 (-26.63, 49.64)   | 8.0×10 <sup>-1</sup> |
| d_Fungi:p_Basidiomycota;c_Agaricomycetes | FEV <sub>1</sub> /FVC | 27.41 (-7.44, 75.38)   | 1.4×10 <sup>-1</sup> |
| d_Fungi:p_Basidiomycota;c_Agaricomycetes | PEF                   | 30.01 (-48.32, 227.09) | 5.8×10 <sup>-1</sup> |
| d_Fungi:p_Basidiomycota;c_Agaricomycetes | FEF <sub>25-75</sub>  | 19.41 (-55.82, 222.72) | 7.3×10 <sup>-1</sup> |
| d_Fungi:p_Basidiomycota;c_Agaricomycetes | FEF <sub>25</sub>     | -2.14 (-62.26, 153.72) | 9.6×10 <sup>-1</sup> |
| d_Fungi:p_Basidiomycota;c_Agaricomycetes | FEF <sub>50</sub>     | 17.78 (-59.02, 238.52) | 7.6×10 <sup>-1</sup> |
| d_Fungi:p_Basidiomycota;c_Agaricomycetes | FEF <sub>75</sub>     | 50.32 (-57.8, 435.52)  | 5.3×10 <sup>-1</sup> |

Note: The regressions were only conducted for the major taxonomic class with total number of ASVs > 100 among all samples. In total, 7 bacterial classes and 4 fungal classes were identified and analyzed. Percentage changes and 95% confidence intervals were calculated for per 100 ASVs increase. Linear mixed-effect models were adjusted for age, gender, BMI, season, PM<sub>2.5</sub>, purification status (real or sham), temperature, relative humidity, and a random intercept for each participant. FVC, forced vital capacity; FEV<sub>1</sub>, forced expiratory volume in one second; PEF, peak expiratory flow; FEF<sub>25</sub>, forced expiratory flow at 25% of FVC; FEF<sub>50</sub>, forced expiratory flow at 50% of FVC; FEF<sub>75</sub>, forced expiratory flow at 75% of FVC; FEF<sub>25-75</sub>, forced expiratory flow from 25-75% of FVC; CIs, confidence intervals.

**Table S3.** Description of absolute abundance of the high-abundant microbial genera.

| Taxon                                                                                                         | All            |                           | Sham-purification |                           | Real-purification |                           | p-Value              |
|---------------------------------------------------------------------------------------------------------------|----------------|---------------------------|-------------------|---------------------------|-------------------|---------------------------|----------------------|
|                                                                                                               | n <sup>a</sup> | Mean (Range) <sup>b</sup> | n <sup>a</sup>    | Mean (Range) <sup>b</sup> | n <sup>a</sup>    | Mean (Range) <sup>b</sup> |                      |
| d_Bacteria;p_Actinobacteria;c_Actinobacteria;o_Actinomycetales;f_Actinomycetaceae;g_Actinomycetes             | 10             | 0.37 (0-4.76)             | 6                 | 0.36 (0-1.97)             | 4                 | 0.37 (0-4.76)             | 7.2×10 <sup>-1</sup> |
| d_Bacteria;p_Actinobacteria;c_Actinobacteria;o_Corynebacteriales;f_Corynebacteriaceae;g_Corynebacterium       | 40             | 17.19 (0-80.74)           | 21                | 23.43 (0-80.74)           | 19                | 10.96 (0-39.49)           | 3.2×10 <sup>-2</sup> |
| d_Bacteria;p_Actinobacteria;c_Actinobacteria;o_Frankiales;f_Geodermatophilaceae;g_Geodermatophilus            | 18             | 1.62 (0-17.37)            | 13                | 2.1 (0-11.58)             | 5                 | 1.15 (0-17.37)            | 9.4×10 <sup>-2</sup> |
| d_Bacteria;p_Actinobacteria;c_Actinobacteria;o_Micrococcales;f_Micrococcaceae;g_Kocuria                       | 27             | 13.57 (0-178.76)          | 17                | 22.57 (0-178.76)          | 10                | 4.57 (0-53.15)            | 7.0×10 <sup>-2</sup> |
| d_Bacteria;p_Actinobacteria;c_Actinobacteria;o_Micrococcales;f_Micrococcaceae;g_Micrococcus                   | 33             | 14.76 (0-103.87)          | 18                | 20.54 (0-74.67)           | 15                | 8.98 (0-103.87)           | 5.7×10 <sup>-2</sup> |
| d_Bacteria;p_Actinobacteria;c_Actinobacteria;o_Propionibacteriales;f_Nocardioideae;g_Nocardioidea             | 18             | 2.18 (0-43.05)            | 10                | 0.87 (0-6.31)             | 8                 | 3.49 (0-43.05)            | 3.1×10 <sup>-1</sup> |
| d_Bacteria;p_Bacteroidetes;c_Bacteroidia;o_Flavobacteriales;f_Weeksellaceae;g_Cloacibacterium                 | 27             | 24.71 (0-220.13)          | 16                | 31.64 (0-220.13)          | 11                | 17.78 (0-104.61)          | 4.2×10 <sup>-1</sup> |
| d_Bacteria;p_Cyanobacteria;c_Oxyphotobacteria;o_Chloroplast;f_Chloroplast;g_Chloroplast                       | 32             | 45.33 (0-497.82)          | 17                | 39.95 (0-334.74)          | 15                | 50.71 (0-497.82)          | 2.7×10 <sup>-1</sup> |
| d_Bacteria;p_Deinococcus-Thermus;c_Deinococci;o_Deinococcales;f_Deinococcaceae;g_Deinococcus                  | 24             | 33.66 (0-1395.7)          | 14                | 2.71 (0-22.01)            | 10                | 64.61 (0-1395.7)          | 5.4×10 <sup>-1</sup> |
| d_Bacteria;p_Firmicutes;c_Bacilli;o_Bacillales;f_Staphylococcaceae;g_Abyssicoccus                             | 20             | 1.91 (0-23.68)            | 13                | 3.35 (0-23.68)            | 7                 | 0.48 (0-3.56)             | 1.8×10 <sup>-2</sup> |
| d_Bacteria;p_Firmicutes;c_Bacilli;o_Bacillales;f_Staphylococcaceae;g_Staphylococcus                           | 39             | 32.98 (0-345.58)          | 22                | 42.95 (0-345.58)          | 17                | 23.01 (0-328.83)          | 2.0×10 <sup>-2</sup> |
| d_Bacteria;p_Firmicutes;c_Bacilli;o_Lactobacillales;f_Lactobacillaceae;g_Lactobacillus                        | 17             | 32.51 (0-1394.95)         | 9                 | 59.25 (0-1394.95)         | 8                 | 5.76 (0-55.74)            | 9.3×10 <sup>-1</sup> |
| d_Bacteria;p_Firmicutes;c_Bacilli;o_Lactobacillales;f_Streptococcaceae;g_Streptococcus                        | 25             | 2.92 (0-21.62)            | 14                | 3.9 (0-20.47)             | 11                | 1.95 (0-21.62)            | 1.4×10 <sup>-1</sup> |
| d_Bacteria;p_Proteobacteria;c_Alphaproteobacteria;o_Caulobacterales;f_Caulobacteraceae;g_Caulobacter          | 24             | 16.55 (0-265.81)          | 14                | 10.83 (0-114.46)          | 10                | 22.27 (0-265.81)          | 2.8×10 <sup>-1</sup> |
| d_Bacteria;p_Proteobacteria;c_Alphaproteobacteria;o_Rhizobiales;f_Bejerinckiaceae;g_Methylobacterium          | 21             | 3.82 (0-42.63)            | 11                | 4.53 (0-42.63)            | 10                | 3.11 (0-21.72)            | 9.0×10 <sup>-1</sup> |
| d_Bacteria;p_Proteobacteria;c_Alphaproteobacteria;o_Rhizobiales;f_Hyphomicrobiales;g_Hyphomicrobium           | 23             | 2.92 (0-48.44)            | 11                | 1.75 (0-14.67)            | 12                | 4.09 (0-48.44)            | 4.5×10 <sup>-1</sup> |
| d_Bacteria;p_Proteobacteria;c_Alphaproteobacteria;o_Rhizobiales;f_Pleomorphomonadaceae;g_Pleomorphomonas      | 13             | 3.22 (0-38.51)            | 6                 | 3.82 (0-38.51)            | 7                 | 2.62 (0-26.73)            | 7.8×10 <sup>-1</sup> |
| d_Bacteria;p_Proteobacteria;c_Alphaproteobacteria;o_Rhizobiales;f_Rhizobiaceae;g_Allorhizobium                | 36             | 16.51 (0-114.24)          | 20                | 20.11 (0-114.24)          | 16                | 12.9 (0-77.05)            | 1.4×10 <sup>-1</sup> |
| d_Bacteria;p_Proteobacteria;c_Alphaproteobacteria;o_Rhizobiales;f_Rhizobiales_Incertae_Sedis;g_Phreatobacter  | 21             | 3.96 (0-114.57)           | 13                | 6.6 (0-114.57)            | 8                 | 1.32 (0-10.27)            | 3.4×10 <sup>-1</sup> |
| d_Bacteria;p_Proteobacteria;c_Alphaproteobacteria;o_Rhizobiales;f_Xanthobacteraceae;g_Bradyrhizobium          | 20             | 3.54 (0-64.69)            | 10                | 1.43 (0-12.59)            | 10                | 5.65 (0-64.69)            | 8.5×10 <sup>-1</sup> |
| d_Bacteria;p_Proteobacteria;c_Alphaproteobacteria;o_Rhizobiales;f_Xanthobacteraceae;g_Pseudolabrys            | 40             | 73.34 (0-885.34)          | 21                | 78.83 (0-885.34)          | 19                | 67.85 (0-377.98)          | 9.9×10 <sup>-1</sup> |
| d_Bacteria;p_Proteobacteria;c_Alphaproteobacteria;o_Rhizobiales;f_Xanthobacteraceae;g_Rhodospseudomonas       | 23             | 4.86 (0-47.05)            | 12                | 3.83 (0-47.05)            | 11                | 5.9 (0-44.64)             | 4.6×10 <sup>-1</sup> |
| d_Bacteria;p_Proteobacteria;c_Alphaproteobacteria;o_Rhodobacterales;f_Rhodobacteraceae;g_Paracoccus           | 27             | 3.88 (0-48.87)            | 18                | 5.5 (0-48.87)             | 9                 | 2.26 (0-13.64)            | 1.3×10 <sup>-1</sup> |
| d_Bacteria;p_Proteobacteria;c_Alphaproteobacteria;o_Sphingomonadales;f_Sphingomonadaceae;g_Novosphingobium    | 28             | 6.87 (0-91.2)             | 16                | 7.56 (0-91.2)             | 12                | 6.18 (0-34.3)             | 1.0×10 <sup>0</sup>  |
| d_Bacteria;p_Proteobacteria;c_Alphaproteobacteria;o_Sphingomonadales;f_Sphingomonadaceae;g_Sphingomonas       | 32             | 8.76 (0-68.37)            | 18                | 8.2 (0-68.37)             | 14                | 9.31 (0-66.41)            | 9.2×10 <sup>-1</sup> |
| d_Bacteria;p_Proteobacteria;c_Gammaproteobacteria;o_Aeromonadales;f_Aeromonadaceae;g_Tolomonas                | 22             | 17.07 (0-148.61)          | 12                | 21.77 (0-148.61)          | 10                | 12.37 (0-79.11)           | 5.1×10 <sup>-1</sup> |
| d_Bacteria;p_Proteobacteria;c_Gammaproteobacteria;o_Betaproteobacteriales;f_Burkholderiaceae;g_Acidovorax     | 11             | 2.9 (0-71.37)             | 6                 | 0.99 (0-9.39)             | 5                 | 4.81 (0-71.37)            | 7.6×10 <sup>-1</sup> |
| d_Bacteria;p_Proteobacteria;c_Gammaproteobacteria;o_Betaproteobacteriales;f_Burkholderiaceae;g_Aquabacterium  | 24             | 7.29 (0-139.56)           | 12                | 9.91 (0-139.56)           | 12                | 4.67 (0-40.99)            | 8.6×10 <sup>-1</sup> |
| d_Bacteria;p_Proteobacteria;c_Gammaproteobacteria;o_Betaproteobacteriales;f_Burkholderiaceae;g_Hydrogenophaga | 20             | 4.16 (0-36.66)            | 12                | 4.47 (0-36.66)            | 8                 | 3.85 (0-24.77)            | 6.7×10 <sup>-1</sup> |
| d_Bacteria;p_Proteobacteria;c_Gammaproteobacteria;o_Betaproteobacteriales;f_Burkholderiaceae;g_Massilia       | 10             | 1.05 (0-33.95)            | 7                 | 0.36 (0-3.39)             | 3                 | 1.73 (0-33.95)            | 9.1×10 <sup>-1</sup> |
| d_Bacteria;p_Proteobacteria;c_Gammaproteobacteria;o_Betaproteobacteriales;f_Burkholderiaceae;g_Ralstonia      | 24             | 6.61 (0-80.34)            | 15                | 9.85 (0-80.34)            | 9                 | 3.37 (0-22.2)             | 1.7×10 <sup>-1</sup> |
| d_Bacteria;p_Proteobacteria;c_Gammaproteobacteria;o_Betaproteobacteriales;f_Burkholderiaceae;g_Tepidimonas    | 10             | 14.92 (0-650.37)          | 5                 | 1.11 (0-14.65)            | 5                 | 28.72 (0-650.37)          | 1.0×10 <sup>0</sup>  |
| d_Bacteria;p_Proteobacteria;c_Gammaproteobacteria;o_Betaproteobacteriales;f_Rhodocyclaceae;g_Dechloromonas    | 13             | 6.84 (0-193.62)           | 5                 | 8.35 (0-193.62)           | 8                 | 5.34 (0-82.91)            | 5.0×10 <sup>-1</sup> |
| d_Bacteria;p_Proteobacteria;c_Gammaproteobacteria;o_Betaproteobacteriales;f_Rhodocyclaceae;g_Zoogloea         | 10             | 9.03 (0-218.1)            | 5                 | 9.73 (0-218.1)            | 5                 | 8.33 (0-124.9)            | 7.6×10 <sup>-1</sup> |
| d_Bacteria;p_Proteobacteria;c_Gammaproteobacteria;o_Enterobacteriales;f_Enterobacteriaceae;g_Klebsiella       | 10             | 8.31 (0-345.23)           | 8                 | 1.43 (0-14.34)            | 2                 | 15.19 (0-345.23)          | 5.5×10 <sup>-1</sup> |
| d_Bacteria;p_Proteobacteria;c_Gammaproteobacteria;o_Oceanospirillales;f_Halomonadaceae;g_Halomonas            | 26             | 3.03 (0-35.78)            | 15                | 4.93 (0-35.78)            | 11                | 1.13 (0-11.84)            | 6.1×10 <sup>-2</sup> |
| d_Bacteria;p_Proteobacteria;c_Gammaproteobacteria;o_Pseudomonadales;f_Moraxellaceae;g_Acinetobacter           | 42             | 109.28 (0-971.06)         | 22                | 125.64 (0-971.06)         | 20                | 92.91 (0-463.4)           | 6.6×10 <sup>-1</sup> |
| d_Bacteria;p_Proteobacteria;c_Gammaproteobacteria;o_Pseudomonadales;f_Moraxellaceae;g_Enhydrobacter           | 34             | 12.16 (0-117.03)          | 20                | 10.07 (0-79.21)           | 14                | 14.25 (0-117.03)          | 7.0×10 <sup>-1</sup> |
| d_Bacteria;p_Proteobacteria;c_Gammaproteobacteria;o_Pseudomonadales;f_Pseudomonadaceae;g_Pseudomonas          | 48             | 101.15 (0.27-1460.66)     | 24                | 61.28 (0.27-389.26)       | 24                | 141.02 (0.56-1460.66)     | 9.5×10 <sup>-2</sup> |
| d_Bacteria;p_Proteobacteria;c_Gammaproteobacteria;o_Vibrionales;f_Vibrionaceae;g_Vibrio                       | 39             | 17 (0-144.1)              | 20                | 20.6 (0-144.1)            | 19                | 13.41 (0-118.67)          | 4.0×10 <sup>-1</sup> |
| d_Bacteria;p_Proteobacteria;c_Gammaproteobacteria;o_Xanthomonadales;f_Xanthomonadaceae;g_Pseudoxanthomonas    | 11             | 3.97 (0-41.21)            | 6                 | 4.08 (0-41.21)            | 5                 | 3.86 (0-36.43)            | 9.2×10 <sup>-1</sup> |
| d_Fungi;p_Ascmycota;c_Dothideomycetes;o_Capnodiales;f_Mycosphaerellaceae;g_Mycosphaerella                     | 24             | 0.36 (0-7.42)             | 16                | 0.66 (0-7.42)             | 8                 | 0.05 (0-1.15)             | 1.5×10 <sup>-2</sup> |
| d_Fungi;p_Ascmycota;c_Dothideomycetes;o_Pleosporales;f_Didymellaceae;g_Calophoma                              | 20             | 0.4 (0-11.77)             | 12                | 0.23 (0-1.7)              | 8                 | 0.57 (0-11.77)            | 1.3×10 <sup>-1</sup> |
| d_Fungi;p_Ascmycota;c_Dothideomycetes;o_Pleosporales;f_Pleosporaceae;g_Alternaria                             | 12             | 0.12 (0-2.27)             | 7                 | 0.21 (0-2.27)             | 5                 | 0.02 (0-0.44)             | 6.7×10 <sup>-2</sup> |

|                                                                                           |    |                 |    |                |    |                    |                      |
|-------------------------------------------------------------------------------------------|----|-----------------|----|----------------|----|--------------------|----------------------|
| d_Fungi;p_Ascomycota;c_Eurotiomycetes;o_Eurotiales;f_Aspergillaceae;g_Aspergillus         | 22 | 0.87 (0-20.76)  | 14 | 1.68 (0-20.76) | 8  | 0.05 (0-1.09)      | $9.2 \times 10^{-3}$ |
| d_Fungi;p_Ascomycota;c_Eurotiomycetes;o_Eurotiales;f_Aspergillaceae;g_Penicillium         | 27 | 0.71 (0-12.78)  | 14 | 0.79 (0-9.09)  | 13 | 0.63 (0-12.78)     | $3.7 \times 10^{-2}$ |
| d_Fungi;p_Ascomycota;c_Eurotiomycetes;o_Eurotiales;f_Trichocomaceae;g_Talaromyces         | 19 | 0.37 (0-6.58)   | 12 | 0.58 (0-6.58)  | 7  | 0.15 (0-1.39)      | $3.7 \times 10^{-1}$ |
| d_Fungi;p_Ascomycota;c_Sordariomycetes;o_Hypocreales;f_Nectriaceae;g_Gibberella           | 22 | 0.58 (0-14.23)  | 12 | 0.5 (0-4.86)   | 10 | 0.65 (0-14.23)     | $4.5 \times 10^{-1}$ |
| d_Fungi;p_Basidiomycota;c_Agaricomycetes;o_Atheliales;f_Atheliaceae;g_Tylospora           | 13 | 0.27 (0-7)      | 3  | 0.02 (0-0.42)  | 10 | 0.52 (0-7)         | $2.1 \times 10^{-2}$ |
| d_Fungi;p_Basidiomycota;c_Malasseziomycetes;o_Malasseziales;f_Malasseziaceae;g_Malassezia | 22 | 3.75 (0-171.43) | 8  | 0.05 (0-0.8)   | 14 | 7.44 (0-171.43)    | $3.1 \times 10^{-2}$ |
| d_Fungi;p_Basidiomycota;c_Wallemiomycetes;o_Wallemiales;f_Wallemiaceae;g_Wallemia         | 12 | 0.23 (0-10.79)  | 7  | 0.46 (0-10.79) | 5  | 0.00058 (0-0.0037) | $1.3 \times 10^{-1}$ |

Note: The high-abundant microbial genera were defined as taxonomic genera present in at least 10 dormitory air samples with average relative abundance > 0.3%. In total, 41 bacterial genera and 10 fungal genera were identified and analyzed. The *p*-Value was the result of the difference between sham and real air purification using Wilcoxon signed-rank test.

<sup>a</sup> The number of dormitory air samples that the microbial genera existed in.

<sup>b</sup> Absolute abundance of bacterial genera was expressed as “16S rRNA gene copies/m<sup>3</sup>”. Absolute abundance of fungal genera was expressed as “18S rRNA gene copies/m<sup>3</sup>”.

**Table S4.** All results of associations between indoor airborne microbial absolute abundance and lung function measures.

| Taxon                                                                                                   | Lung function measures | Percentage changes (95% CIs) | p-Value              |
|---------------------------------------------------------------------------------------------------------|------------------------|------------------------------|----------------------|
| d_Bacteria;p_Actinobacteria;c_Actinobacteria;o_Actinomycetales;f_Actinomycetaceae;g_Actinomyces         | FVC                    | -0.04 (-0.95, 0.89)          | 9.4×10 <sup>-1</sup> |
| d_Bacteria;p_Actinobacteria;c_Actinobacteria;o_Actinomycetales;f_Actinomycetaceae;g_Actinomyces         | FEV <sub>1</sub>       | 0.78 (0.03, 1.53)            | 4.6×10 <sup>-2</sup> |
| d_Bacteria;p_Actinobacteria;c_Actinobacteria;o_Actinomycetales;f_Actinomycetaceae;g_Actinomyces         | FEV <sub>1</sub> /FVC  | 0.54 (-0.14, 1.22)           | 1.3×10 <sup>-1</sup> |
| d_Bacteria;p_Actinobacteria;c_Actinobacteria;o_Actinomycetales;f_Actinomycetaceae;g_Actinomyces         | PEF                    | 2.93 (1.01, 4.89)            | 3.5×10 <sup>-3</sup> |
| d_Bacteria;p_Actinobacteria;c_Actinobacteria;o_Actinomycetales;f_Actinomycetaceae;g_Actinomyces         | FEF <sub>25-75</sub>   | 2.84 (0.78, 4.94)            | 8.0×10 <sup>-3</sup> |
| d_Bacteria;p_Actinobacteria;c_Actinobacteria;o_Actinomycetales;f_Actinomycetaceae;g_Actinomyces         | FEF <sub>25</sub>      | 2.73 (0.73, 4.76)            | 8.7×10 <sup>-3</sup> |
| d_Bacteria;p_Actinobacteria;c_Actinobacteria;o_Actinomycetales;f_Actinomycetaceae;g_Actinomyces         | FEF <sub>50</sub>      | 2.88 (0.69, 5.12)            | 1.1×10 <sup>-2</sup> |
| d_Bacteria;p_Actinobacteria;c_Actinobacteria;o_Actinomycetales;f_Actinomycetaceae;g_Actinomyces         | FEF <sub>75</sub>      | 2.78 (0.13, 5.51)            | 4.3×10 <sup>-2</sup> |
| d_Bacteria;p_Actinobacteria;c_Actinobacteria;o_Corynebacteriales;f_Corynebacteriaceae;g_Corynebacterium | FVC                    | 0.4 (-0.59, 1.4)             | 4.3×10 <sup>-1</sup> |
| d_Bacteria;p_Actinobacteria;c_Actinobacteria;o_Corynebacteriales;f_Corynebacteriaceae;g_Corynebacterium | FEV <sub>1</sub>       | 0.22 (-0.63, 1.08)           | 6.1×10 <sup>-1</sup> |
| d_Bacteria;p_Actinobacteria;c_Actinobacteria;o_Corynebacteriales;f_Corynebacteriaceae;g_Corynebacterium | FEV <sub>1</sub> /FVC  | -0.31 (-1.02, 0.41)          | 4.0×10 <sup>-1</sup> |
| d_Bacteria;p_Actinobacteria;c_Actinobacteria;o_Corynebacteriales;f_Corynebacteriaceae;g_Corynebacterium | PEF                    | -0.95 (-3.04, 1.19)          | 3.8×10 <sup>-1</sup> |
| d_Bacteria;p_Actinobacteria;c_Actinobacteria;o_Corynebacteriales;f_Corynebacteriaceae;g_Corynebacterium | FEF <sub>25-75</sub>   | -1.26 (-3.46, 0.98)          | 2.7×10 <sup>-1</sup> |
| d_Bacteria;p_Actinobacteria;c_Actinobacteria;o_Corynebacteriales;f_Corynebacteriaceae;g_Corynebacterium | FEF <sub>25</sub>      | -0.78 (-2.97, 1.45)          | 4.9×10 <sup>-1</sup> |
| d_Bacteria;p_Actinobacteria;c_Actinobacteria;o_Corynebacteriales;f_Corynebacteriaceae;g_Corynebacterium | FEF <sub>50</sub>      | -1.56 (-3.86, 0.8)           | 2.0×10 <sup>-1</sup> |
| d_Bacteria;p_Actinobacteria;c_Actinobacteria;o_Corynebacteriales;f_Corynebacteriaceae;g_Corynebacterium | FEF <sub>75</sub>      | -0.98 (-3.73, 1.85)          | 4.9×10 <sup>-1</sup> |
| d_Bacteria;p_Actinobacteria;c_Actinobacteria;o_Frankiales;f_Geodermatophilaceae;g_Geodermatophilus      | FVC                    | 0.28 (-0.53, 1.09)           | 5.1×10 <sup>-1</sup> |
| d_Bacteria;p_Actinobacteria;c_Actinobacteria;o_Frankiales;f_Geodermatophilaceae;g_Geodermatophilus      | FEV <sub>1</sub>       | 0.44 (-0.23, 1.11)           | 2.1×10 <sup>-1</sup> |
| d_Bacteria;p_Actinobacteria;c_Actinobacteria;o_Frankiales;f_Geodermatophilaceae;g_Geodermatophilus      | FEV <sub>1</sub> /FVC  | 0.04 (-0.58, 0.66)           | 9.1×10 <sup>-1</sup> |
| d_Bacteria;p_Actinobacteria;c_Actinobacteria;o_Frankiales;f_Geodermatophilaceae;g_Geodermatophilus      | PEF                    | -1.2 (-2.93, 0.56)           | 1.9×10 <sup>-1</sup> |
| d_Bacteria;p_Actinobacteria;c_Actinobacteria;o_Frankiales;f_Geodermatophilaceae;g_Geodermatophilus      | FEF <sub>25-75</sub>   | 0.41 (-1.49, 2.34)           | 6.8×10 <sup>-1</sup> |
| d_Bacteria;p_Actinobacteria;c_Actinobacteria;o_Frankiales;f_Geodermatophilaceae;g_Geodermatophilus      | FEF <sub>25</sub>      | -0.98 (-2.77, 0.84)          | 2.9×10 <sup>-1</sup> |
| d_Bacteria;p_Actinobacteria;c_Actinobacteria;o_Frankiales;f_Geodermatophilaceae;g_Geodermatophilus      | FEF <sub>50</sub>      | 0.67 (-1.34, 2.72)           | 5.2×10 <sup>-1</sup> |
| d_Bacteria;p_Actinobacteria;c_Actinobacteria;o_Frankiales;f_Geodermatophilaceae;g_Geodermatophilus      | FEF <sub>75</sub>      | 1.19 (-1.23, 3.67)           | 3.4×10 <sup>-1</sup> |
| d_Bacteria;p_Actinobacteria;c_Actinobacteria;o_Micrococcales;f_Micrococcaceae;g_Kocuria                 | FVC                    | 0 (-0.69, 0.7)               | 9.9×10 <sup>-1</sup> |
| d_Bacteria;p_Actinobacteria;c_Actinobacteria;o_Micrococcales;f_Micrococcaceae;g_Kocuria                 | FEV <sub>1</sub>       | 0.58 (0.02, 1.15)            | 4.5×10 <sup>-2</sup> |
| d_Bacteria;p_Actinobacteria;c_Actinobacteria;o_Micrococcales;f_Micrococcaceae;g_Kocuria                 | FEV <sub>1</sub> /FVC  | 0.28 (-0.23, 0.8)            | 2.9×10 <sup>-1</sup> |
| d_Bacteria;p_Actinobacteria;c_Actinobacteria;o_Micrococcales;f_Micrococcaceae;g_Kocuria                 | PEF                    | 1.3 (-0.16, 2.79)            | 8.5×10 <sup>-2</sup> |
| d_Bacteria;p_Actinobacteria;c_Actinobacteria;o_Micrococcales;f_Micrococcaceae;g_Kocuria                 | FEF <sub>25-75</sub>   | 0.73 (-0.86, 2.34)           | 3.7×10 <sup>-1</sup> |
| d_Bacteria;p_Actinobacteria;c_Actinobacteria;o_Micrococcales;f_Micrococcaceae;g_Kocuria                 | FEF <sub>25</sub>      | 1.36 (-0.15, 2.9)            | 8.1×10 <sup>-2</sup> |
| d_Bacteria;p_Actinobacteria;c_Actinobacteria;o_Micrococcales;f_Micrococcaceae;g_Kocuria                 | FEF <sub>50</sub>      | 0.65 (-1.03, 2.36)           | 4.5×10 <sup>-1</sup> |
| d_Bacteria;p_Actinobacteria;c_Actinobacteria;o_Micrococcales;f_Micrococcaceae;g_Kocuria                 | FEF <sub>75</sub>      | 0.57 (-1.45, 2.63)           | 5.8×10 <sup>-1</sup> |
| d_Bacteria;p_Actinobacteria;c_Actinobacteria;o_Micrococcales;f_Micrococcaceae;g_Micrococcus             | FVC                    | 0.56 (-0.16, 1.29)           | 1.3×10 <sup>-1</sup> |
| d_Bacteria;p_Actinobacteria;c_Actinobacteria;o_Micrococcales;f_Micrococcaceae;g_Micrococcus             | FEV <sub>1</sub>       | 0.25 (-0.37, 0.88)           | 4.3×10 <sup>-1</sup> |
| d_Bacteria;p_Actinobacteria;c_Actinobacteria;o_Micrococcales;f_Micrococcaceae;g_Micrococcus             | FEV <sub>1</sub> /FVC  | -0.32 (-0.86, 0.23)          | 2.6×10 <sup>-1</sup> |
| d_Bacteria;p_Actinobacteria;c_Actinobacteria;o_Micrococcales;f_Micrococcaceae;g_Micrococcus             | PEF                    | -0.71 (-2.28, 0.89)          | 3.9×10 <sup>-1</sup> |
| d_Bacteria;p_Actinobacteria;c_Actinobacteria;o_Micrococcales;f_Micrococcaceae;g_Micrococcus             | FEF <sub>25-75</sub>   | -0.28 (-1.97, 1.44)          | 7.5×10 <sup>-1</sup> |
| d_Bacteria;p_Actinobacteria;c_Actinobacteria;o_Micrococcales;f_Micrococcaceae;g_Micrococcus             | FEF <sub>25</sub>      | -0.47 (-2.1, 1.19)           | 5.8×10 <sup>-1</sup> |
| d_Bacteria;p_Actinobacteria;c_Actinobacteria;o_Micrococcales;f_Micrococcaceae;g_Micrococcus             | FEF <sub>50</sub>      | -0.56 (-2.33, 1.25)          | 5.4×10 <sup>-1</sup> |
| d_Bacteria;p_Actinobacteria;c_Actinobacteria;o_Micrococcales;f_Micrococcaceae;g_Micrococcus             | FEF <sub>75</sub>      | 0.06 (-2.09, 2.25)           | 9.6×10 <sup>-1</sup> |
| d_Bacteria;p_Actinobacteria;c_Actinobacteria;o_Propionibacteriales;f_Nocardioidaceae;g_Nocardioides     | FVC                    | -0.18 (-0.83, 0.48)          | 6.0×10 <sup>-1</sup> |
| d_Bacteria;p_Actinobacteria;c_Actinobacteria;o_Propionibacteriales;f_Nocardioidaceae;g_Nocardioides     | FEV <sub>1</sub>       | 0.44 (-0.09, 0.97)           | 1.1×10 <sup>-1</sup> |
| d_Bacteria;p_Actinobacteria;c_Actinobacteria;o_Propionibacteriales;f_Nocardioidaceae;g_Nocardioides     | FEV <sub>1</sub> /FVC  | 0.54 (0.04, 1.04)            | 3.7×10 <sup>-2</sup> |
| d_Bacteria;p_Actinobacteria;c_Actinobacteria;o_Propionibacteriales;f_Nocardioidaceae;g_Nocardioides     | PEF                    | 0.65 (-0.78, 2.1)            | 3.8×10 <sup>-1</sup> |

|                                                                                                     |                       |                      |                      |
|-----------------------------------------------------------------------------------------------------|-----------------------|----------------------|----------------------|
| d_Bacteria;p_Actinobacteria;c_Actinobacteria;o_Propionibacteriales;f_Nocardioideaceae;g_Nocardioide | FEF <sub>25-75</sub>  | 1.2 (-0.33, 2.77)    | 1.3×10 <sup>-1</sup> |
| d_Bacteria;p_Actinobacteria;c_Actinobacteria;o_Propionibacteriales;f_Nocardioideaceae;g_Nocardioide | FEF <sub>25</sub>     | 0.51 (-0.96, 2)      | 5.0×10 <sup>-1</sup> |
| d_Bacteria;p_Actinobacteria;c_Actinobacteria;o_Propionibacteriales;f_Nocardioideaceae;g_Nocardioide | FEF <sub>50</sub>     | 1.26 (-0.37, 2.92)   | 1.3×10 <sup>-1</sup> |
| d_Bacteria;p_Actinobacteria;c_Actinobacteria;o_Propionibacteriales;f_Nocardioideaceae;g_Nocardioide | FEF <sub>75</sub>     | 1.79 (-0.2, 3.81)    | 8.2×10 <sup>-2</sup> |
| d_Bacteria;p_Bacteroidetes;c_Bacteroidia;o_Flavobacteriales;f_Weeksellaceae;g_Cloacibacterium       | FVC                   | 0.62 (-0.03, 1.28)   | 6.6×10 <sup>-2</sup> |
| d_Bacteria;p_Bacteroidetes;c_Bacteroidia;o_Flavobacteriales;f_Weeksellaceae;g_Cloacibacterium       | FEV <sub>1</sub>      | -0.21 (-0.76, 0.34)  | 4.5×10 <sup>-1</sup> |
| d_Bacteria;p_Bacteroidetes;c_Bacteroidia;o_Flavobacteriales;f_Weeksellaceae;g_Cloacibacterium       | FEV <sub>1</sub> /FVC | -0.59 (-1.06, -0.13) | 1.5×10 <sup>-2</sup> |
| d_Bacteria;p_Bacteroidetes;c_Bacteroidia;o_Flavobacteriales;f_Weeksellaceae;g_Cloacibacterium       | PEF                   | -0.53 (-1.93, 0.88)  | 4.6×10 <sup>-1</sup> |
| d_Bacteria;p_Bacteroidetes;c_Bacteroidia;o_Flavobacteriales;f_Weeksellaceae;g_Cloacibacterium       | FEF <sub>25-75</sub>  | -1.26 (-2.71, 0.22)  | 9.8×10 <sup>-2</sup> |
| d_Bacteria;p_Bacteroidetes;c_Bacteroidia;o_Flavobacteriales;f_Weeksellaceae;g_Cloacibacterium       | FEF <sub>25</sub>     | -0.8 (-2.23, 0.65)   | 2.8×10 <sup>-1</sup> |
| d_Bacteria;p_Bacteroidetes;c_Bacteroidia;o_Flavobacteriales;f_Weeksellaceae;g_Cloacibacterium       | FEF <sub>50</sub>     | -1.36 (-2.89, 0.2)   | 9.1×10 <sup>-2</sup> |
| d_Bacteria;p_Bacteroidetes;c_Bacteroidia;o_Flavobacteriales;f_Weeksellaceae;g_Cloacibacterium       | FEF <sub>75</sub>     | -1.95 (-3.77, -0.11) | 4.1×10 <sup>-2</sup> |
| d_Bacteria;p_Cyanobacteria;c_Oxyphotobacteria;o_Chloroplast;f_Chloroplast;g_Chloroplast             | FVC                   | -0.28 (-0.98, 0.42)  | 4.3×10 <sup>-1</sup> |
| d_Bacteria;p_Cyanobacteria;c_Oxyphotobacteria;o_Chloroplast;f_Chloroplast;g_Chloroplast             | FEV <sub>1</sub>      | 0.41 (-0.16, 0.99)   | 1.6×10 <sup>-1</sup> |
| d_Bacteria;p_Cyanobacteria;c_Oxyphotobacteria;o_Chloroplast;f_Chloroplast;g_Chloroplast             | FEV <sub>1</sub> /FVC | 0.45 (-0.07, 0.97)   | 9.0×10 <sup>-2</sup> |
| d_Bacteria;p_Cyanobacteria;c_Oxyphotobacteria;o_Chloroplast;f_Chloroplast;g_Chloroplast             | PEF                   | 0.08 (-1.43, 1.62)   | 9.1×10 <sup>-1</sup> |
| d_Bacteria;p_Cyanobacteria;c_Oxyphotobacteria;o_Chloroplast;f_Chloroplast;g_Chloroplast             | FEF <sub>25-75</sub>  | 0.75 (-0.87, 2.39)   | 3.7×10 <sup>-1</sup> |
| d_Bacteria;p_Cyanobacteria;c_Oxyphotobacteria;o_Chloroplast;f_Chloroplast;g_Chloroplast             | FEF <sub>25</sub>     | 0.5 (-1.06, 2.08)    | 5.3×10 <sup>-1</sup> |
| d_Bacteria;p_Cyanobacteria;c_Oxyphotobacteria;o_Chloroplast;f_Chloroplast;g_Chloroplast             | FEF <sub>50</sub>     | 0.78 (-0.94, 2.52)   | 3.8×10 <sup>-1</sup> |
| d_Bacteria;p_Cyanobacteria;c_Oxyphotobacteria;o_Chloroplast;f_Chloroplast;g_Chloroplast             | FEF <sub>75</sub>     | 1.42 (-0.64, 3.53)   | 1.8×10 <sup>-1</sup> |
| d_Bacteria;p_Deinococcus-Thermus;c_Deinococci;o_Deinococcales;f_Deinococcaceae;g_Deinococcus        | FVC                   | 0.45 (-0.2, 1.1)     | 1.8×10 <sup>-1</sup> |
| d_Bacteria;p_Deinococcus-Thermus;c_Deinococci;o_Deinococcales;f_Deinococcaceae;g_Deinococcus        | FEV <sub>1</sub>      | 0.4 (-0.14, 0.94)    | 1.5×10 <sup>-1</sup> |
| d_Bacteria;p_Deinococcus-Thermus;c_Deinococci;o_Deinococcales;f_Deinococcaceae;g_Deinococcus        | FEV <sub>1</sub> /FVC | -0.1 (-0.61, 0.4)    | 6.9×10 <sup>-1</sup> |
| d_Bacteria;p_Deinococcus-Thermus;c_Deinococci;o_Deinococcales;f_Deinococcaceae;g_Deinococcus        | PEF                   | 0.67 (-0.76, 2.12)   | 3.6×10 <sup>-1</sup> |
| d_Bacteria;p_Deinococcus-Thermus;c_Deinococci;o_Deinococcales;f_Deinococcaceae;g_Deinococcus        | FEF <sub>25-75</sub>  | -0.02 (-1.56, 1.54)  | 9.8×10 <sup>-1</sup> |
| d_Bacteria;p_Deinococcus-Thermus;c_Deinococci;o_Deinococcales;f_Deinococcaceae;g_Deinococcus        | FEF <sub>25</sub>     | 0.87 (-0.59, 2.35)   | 2.5×10 <sup>-1</sup> |
| d_Bacteria;p_Deinococcus-Thermus;c_Deinococci;o_Deinococcales;f_Deinococcaceae;g_Deinococcus        | FEF <sub>50</sub>     | -0.22 (-1.85, 1.43)  | 7.9×10 <sup>-1</sup> |
| d_Bacteria;p_Deinococcus-Thermus;c_Deinococci;o_Deinococcales;f_Deinococcaceae;g_Deinococcus        | FEF <sub>75</sub>     | -0.07 (-2.03, 1.93)  | 9.5×10 <sup>-1</sup> |
| d_Bacteria;p_Firmicutes;c_Bacilli;o_Bacillales;f_Staphylococcaceae;g_Abyssicoccus                   | FVC                   | -0.04 (-0.82, 0.74)  | 9.2×10 <sup>-1</sup> |
| d_Bacteria;p_Firmicutes;c_Bacilli;o_Bacillales;f_Staphylococcaceae;g_Abyssicoccus                   | FEV <sub>1</sub>      | 0.32 (-0.32, 0.97)   | 3.3×10 <sup>-1</sup> |
| d_Bacteria;p_Firmicutes;c_Bacilli;o_Bacillales;f_Staphylococcaceae;g_Abyssicoccus                   | FEV <sub>1</sub> /FVC | 0.21 (-0.39, 0.83)   | 4.9×10 <sup>-1</sup> |
| d_Bacteria;p_Firmicutes;c_Bacilli;o_Bacillales;f_Staphylococcaceae;g_Abyssicoccus                   | PEF                   | 0.44 (-1.26, 2.18)   | 6.1×10 <sup>-1</sup> |
| d_Bacteria;p_Firmicutes;c_Bacilli;o_Bacillales;f_Staphylococcaceae;g_Abyssicoccus                   | FEF <sub>25-75</sub>  | 0.63 (-1.21, 2.5)    | 5.1×10 <sup>-1</sup> |
| d_Bacteria;p_Firmicutes;c_Bacilli;o_Bacillales;f_Staphylococcaceae;g_Abyssicoccus                   | FEF <sub>25</sub>     | 0.47 (-1.28, 2.25)   | 6.0×10 <sup>-1</sup> |
| d_Bacteria;p_Firmicutes;c_Bacilli;o_Bacillales;f_Staphylococcaceae;g_Abyssicoccus                   | FEF <sub>50</sub>     | 0.16 (-1.8, 2.15)    | 8.8×10 <sup>-1</sup> |
| d_Bacteria;p_Firmicutes;c_Bacilli;o_Bacillales;f_Staphylococcaceae;g_Abyssicoccus                   | FEF <sub>75</sub>     | 0.82 (-1.54, 3.24)   | 5.0×10 <sup>-1</sup> |
| d_Bacteria;p_Firmicutes;c_Bacilli;o_Bacillales;f_Staphylococcaceae;g_Staphylococcus                 | FVC                   | -0.09 (-0.96, 0.79)  | 8.4×10 <sup>-1</sup> |
| d_Bacteria;p_Firmicutes;c_Bacilli;o_Bacillales;f_Staphylococcaceae;g_Staphylococcus                 | FEV <sub>1</sub>      | 0.34 (-0.39, 1.06)   | 3.7×10 <sup>-1</sup> |
| d_Bacteria;p_Firmicutes;c_Bacilli;o_Bacillales;f_Staphylococcaceae;g_Staphylococcus                 | FEV <sub>1</sub> /FVC | 0.18 (-0.48, 0.84)   | 5.9×10 <sup>-1</sup> |
| d_Bacteria;p_Firmicutes;c_Bacilli;o_Bacillales;f_Staphylococcaceae;g_Staphylococcus                 | PEF                   | 2.65 (0.86, 4.47)    | 4.7×10 <sup>-3</sup> |
| d_Bacteria;p_Firmicutes;c_Bacilli;o_Bacillales;f_Staphylococcaceae;g_Staphylococcus                 | FEF <sub>25-75</sub>  | 0.86 (-1.16, 2.92)   | 4.1×10 <sup>-1</sup> |
| d_Bacteria;p_Firmicutes;c_Bacilli;o_Bacillales;f_Staphylococcaceae;g_Staphylococcus                 | FEF <sub>25</sub>     | 2.34 (0.47, 4.25)    | 1.6×10 <sup>-2</sup> |
| d_Bacteria;p_Firmicutes;c_Bacilli;o_Bacillales;f_Staphylococcaceae;g_Staphylococcus                 | FEF <sub>50</sub>     | 0.47 (-1.67, 2.66)   | 6.7×10 <sup>-1</sup> |
| d_Bacteria;p_Firmicutes;c_Bacilli;o_Bacillales;f_Staphylococcaceae;g_Staphylococcus                 | FEF <sub>75</sub>     | 0.71 (-1.86, 3.35)   | 5.9×10 <sup>-1</sup> |
| d_Bacteria;p_Firmicutes;c_Bacilli;o_Lactobacillales;f_Lactobacillaceae;g_Lactobacillus              | FVC                   | 0.13 (-0.49, 0.77)   | 6.8×10 <sup>-1</sup> |
| d_Bacteria;p_Firmicutes;c_Bacilli;o_Lactobacillales;f_Lactobacillaceae;g_Lactobacillus              | FEV <sub>1</sub>      | 0.05 (-0.47, 0.57)   | 8.5×10 <sup>-1</sup> |
| d_Bacteria;p_Firmicutes;c_Bacilli;o_Lactobacillales;f_Lactobacillaceae;g_Lactobacillus              | FEV <sub>1</sub> /FVC | -0.04 (-0.53, 0.45)  | 8.6×10 <sup>-1</sup> |
| d_Bacteria;p_Firmicutes;c_Bacilli;o_Lactobacillales;f_Lactobacillaceae;g_Lactobacillus              | PEF                   | -0.37 (-1.75, 1.02)  | 6.0×10 <sup>-1</sup> |

|                                                                                                          |                       |                      |                      |
|----------------------------------------------------------------------------------------------------------|-----------------------|----------------------|----------------------|
| d_Bacteria;p_Firmicutes;c_Bacilli;o_Lactobacillales;f_Lactobacillaceae;g_Lactobacillus                   | FEF <sub>25-75</sub>  | -0.18 (-1.66, 1.32)  | 8.1×10 <sup>-1</sup> |
| d_Bacteria;p_Firmicutes;c_Bacilli;o_Lactobacillales;f_Lactobacillaceae;g_Lactobacillus                   | FEF <sub>25</sub>     | -0.07 (-1.48, 1.36)  | 9.3×10 <sup>-1</sup> |
| d_Bacteria;p_Firmicutes;c_Bacilli;o_Lactobacillales;f_Lactobacillaceae;g_Lactobacillus                   | FEF <sub>50</sub>     | -0.19 (-1.76, 1.41)  | 8.1×10 <sup>-1</sup> |
| d_Bacteria;p_Firmicutes;c_Bacilli;o_Lactobacillales;f_Lactobacillaceae;g_Lactobacillus                   | FEF <sub>75</sub>     | -0.03 (-1.93, 1.91)  | 9.8×10 <sup>-1</sup> |
| d_Bacteria;p_Firmicutes;c_Bacilli;o_Lactobacillales;f_Streptococcaceae;g_Streptococcus                   | FVC                   | 0.2 (-0.54, 0.94)    | 6.0×10 <sup>-1</sup> |
| d_Bacteria;p_Firmicutes;c_Bacilli;o_Lactobacillales;f_Streptococcaceae;g_Streptococcus                   | FEV <sub>1</sub>      | 0.36 (-0.26, 0.98)   | 2.5×10 <sup>-1</sup> |
| d_Bacteria;p_Firmicutes;c_Bacilli;o_Lactobacillales;f_Streptococcaceae;g_Streptococcus                   | FEV <sub>1</sub> /FVC | 0.08 (-0.47, 0.63)   | 7.8×10 <sup>-1</sup> |
| d_Bacteria;p_Firmicutes;c_Bacilli;o_Lactobacillales;f_Streptococcaceae;g_Streptococcus                   | PEF                   | -0.12 (-1.71, 1.49)  | 8.8×10 <sup>-1</sup> |
| d_Bacteria;p_Firmicutes;c_Bacilli;o_Lactobacillales;f_Streptococcaceae;g_Streptococcus                   | FEF <sub>25-75</sub>  | 0.04 (-1.66, 1.76)   | 9.6×10 <sup>-1</sup> |
| d_Bacteria;p_Firmicutes;c_Bacilli;o_Lactobacillales;f_Streptococcaceae;g_Streptococcus                   | FEF <sub>25</sub>     | 0.36 (-1.28, 2.03)   | 6.7×10 <sup>-1</sup> |
| d_Bacteria;p_Firmicutes;c_Bacilli;o_Lactobacillales;f_Streptococcaceae;g_Streptococcus                   | FEF <sub>50</sub>     | 0.05 (-1.74, 1.88)   | 9.5×10 <sup>-1</sup> |
| d_Bacteria;p_Firmicutes;c_Bacilli;o_Lactobacillales;f_Streptococcaceae;g_Streptococcus                   | FEF <sub>75</sub>     | -0.16 (-2.31, 2.03)  | 8.8×10 <sup>-1</sup> |
| d_Bacteria;p_Proteobacteria;c_Alphaproteobacteria;o_Caulobacterales;f_Caulobacteraceae;g_Caulobacter     | FVC                   | -0.04 (-0.61, 0.54)  | 9.0×10 <sup>-1</sup> |
| d_Bacteria;p_Proteobacteria;c_Alphaproteobacteria;o_Caulobacterales;f_Caulobacteraceae;g_Caulobacter     | FEV <sub>1</sub>      | 0.14 (-0.33, 0.61)   | 5.7×10 <sup>-1</sup> |
| d_Bacteria;p_Proteobacteria;c_Alphaproteobacteria;o_Caulobacterales;f_Caulobacteraceae;g_Caulobacter     | FEV <sub>1</sub> /FVC | 0.15 (-0.3, 0.6)     | 5.2×10 <sup>-1</sup> |
| d_Bacteria;p_Proteobacteria;c_Alphaproteobacteria;o_Caulobacterales;f_Caulobacteraceae;g_Caulobacter     | PEF                   | 0.72 (-0.52, 1.98)   | 2.6×10 <sup>-1</sup> |
| d_Bacteria;p_Proteobacteria;c_Alphaproteobacteria;o_Caulobacterales;f_Caulobacteraceae;g_Caulobacter     | FEF <sub>25-75</sub>  | 0.94 (-0.41, 2.31)   | 1.8×10 <sup>-1</sup> |
| d_Bacteria;p_Proteobacteria;c_Alphaproteobacteria;o_Caulobacterales;f_Caulobacteraceae;g_Caulobacter     | FEF <sub>25</sub>     | 0.52 (-0.76, 1.81)   | 4.3×10 <sup>-1</sup> |
| d_Bacteria;p_Proteobacteria;c_Alphaproteobacteria;o_Caulobacterales;f_Caulobacteraceae;g_Caulobacter     | FEF <sub>50</sub>     | 0.83 (-0.61, 2.29)   | 2.7×10 <sup>-1</sup> |
| d_Bacteria;p_Proteobacteria;c_Alphaproteobacteria;o_Caulobacterales;f_Caulobacteraceae;g_Caulobacter     | FEF <sub>75</sub>     | 0.98 (-0.79, 2.77)   | 2.8×10 <sup>-1</sup> |
| d_Bacteria;p_Proteobacteria;c_Alphaproteobacteria;o_Rhizobiales;f_Beijerinckiaceae;g_Methylobacterium    | FVC                   | -0.27 (-1.05, 0.51)  | 4.9×10 <sup>-1</sup> |
| d_Bacteria;p_Proteobacteria;c_Alphaproteobacteria;o_Rhizobiales;f_Beijerinckiaceae;g_Methylobacterium    | FEV <sub>1</sub>      | 0.13 (-0.53, 0.8)    | 7.0×10 <sup>-1</sup> |
| d_Bacteria;p_Proteobacteria;c_Alphaproteobacteria;o_Rhizobiales;f_Beijerinckiaceae;g_Methylobacterium    | FEV <sub>1</sub> /FVC | 0.37 (-0.21, 0.94)   | 2.1×10 <sup>-1</sup> |
| d_Bacteria;p_Proteobacteria;c_Alphaproteobacteria;o_Rhizobiales;f_Beijerinckiaceae;g_Methylobacterium    | PEF                   | 1.24 (-0.42, 2.93)   | 1.5×10 <sup>-1</sup> |
| d_Bacteria;p_Proteobacteria;c_Alphaproteobacteria;o_Rhizobiales;f_Beijerinckiaceae;g_Methylobacterium    | FEF <sub>25-75</sub>  | 0.98 (-0.8, 2.8)     | 2.8×10 <sup>-1</sup> |
| d_Bacteria;p_Proteobacteria;c_Alphaproteobacteria;o_Rhizobiales;f_Beijerinckiaceae;g_Methylobacterium    | FEF <sub>25</sub>     | 0.63 (-1.1, 2.4)     | 4.8×10 <sup>-1</sup> |
| d_Bacteria;p_Proteobacteria;c_Alphaproteobacteria;o_Rhizobiales;f_Beijerinckiaceae;g_Methylobacterium    | FEF <sub>50</sub>     | 1.05 (-0.84, 2.97)   | 2.8×10 <sup>-1</sup> |
| d_Bacteria;p_Proteobacteria;c_Alphaproteobacteria;o_Rhizobiales;f_Beijerinckiaceae;g_Methylobacterium    | FEF <sub>75</sub>     | 1.58 (-0.68, 3.89)   | 1.8×10 <sup>-1</sup> |
| d_Bacteria;p_Proteobacteria;c_Alphaproteobacteria;o_Rhizobiales;f_Hyphomicrobiaceae;g_Hyphomicrobium     | FVC                   | 0.57 (-0.16, 1.31)   | 1.3×10 <sup>-1</sup> |
| d_Bacteria;p_Proteobacteria;c_Alphaproteobacteria;o_Rhizobiales;f_Hyphomicrobiaceae;g_Hyphomicrobium     | FEV <sub>1</sub>      | -0.27 (-0.89, 0.35)  | 3.9×10 <sup>-1</sup> |
| d_Bacteria;p_Proteobacteria;c_Alphaproteobacteria;o_Rhizobiales;f_Hyphomicrobiaceae;g_Hyphomicrobium     | FEV <sub>1</sub> /FVC | -0.68 (-1.22, -0.14) | 1.5×10 <sup>-2</sup> |
| d_Bacteria;p_Proteobacteria;c_Alphaproteobacteria;o_Rhizobiales;f_Hyphomicrobiaceae;g_Hyphomicrobium     | PEF                   | -1.07 (-2.64, 0.52)  | 1.9×10 <sup>-1</sup> |
| d_Bacteria;p_Proteobacteria;c_Alphaproteobacteria;o_Rhizobiales;f_Hyphomicrobiaceae;g_Hyphomicrobium     | FEF <sub>25-75</sub>  | -1.93 (-3.56, -0.27) | 2.5×10 <sup>-2</sup> |
| d_Bacteria;p_Proteobacteria;c_Alphaproteobacteria;o_Rhizobiales;f_Hyphomicrobiaceae;g_Hyphomicrobium     | FEF <sub>25</sub>     | -1.7 (-3.28, -0.1)   | 4.0×10 <sup>-2</sup> |
| d_Bacteria;p_Proteobacteria;c_Alphaproteobacteria;o_Rhizobiales;f_Hyphomicrobiaceae;g_Hyphomicrobium     | FEF <sub>50</sub>     | -1.94 (-3.67, -0.17) | 3.4×10 <sup>-2</sup> |
| d_Bacteria;p_Proteobacteria;c_Alphaproteobacteria;o_Rhizobiales;f_Hyphomicrobiaceae;g_Hyphomicrobium     | FEF <sub>75</sub>     | -2.58 (-4.63, -0.48) | 1.8×10 <sup>-2</sup> |
| d_Bacteria;p_Proteobacteria;c_Alphaproteobacteria;o_Rhizobiales;f_Pleomorphomonadaceae;g_Pleomorphomonas | FVC                   | 0.16 (-0.47, 0.79)   | 6.3×10 <sup>-1</sup> |
| d_Bacteria;p_Proteobacteria;c_Alphaproteobacteria;o_Rhizobiales;f_Pleomorphomonadaceae;g_Pleomorphomonas | FEV <sub>1</sub>      | -0.49 (-0.99, 0.01)  | 6.0×10 <sup>-2</sup> |
| d_Bacteria;p_Proteobacteria;c_Alphaproteobacteria;o_Rhizobiales;f_Pleomorphomonadaceae;g_Pleomorphomonas | FEV <sub>1</sub> /FVC | -0.58 (-1.06, -0.11) | 1.9×10 <sup>-2</sup> |
| d_Bacteria;p_Proteobacteria;c_Alphaproteobacteria;o_Rhizobiales;f_Pleomorphomonadaceae;g_Pleomorphomonas | PEF                   | -1.67 (-2.97, -0.36) | 1.5×10 <sup>-2</sup> |
| d_Bacteria;p_Proteobacteria;c_Alphaproteobacteria;o_Rhizobiales;f_Pleomorphomonadaceae;g_Pleomorphomonas | FEF <sub>25-75</sub>  | -1.56 (-2.99, -0.11) | 3.8×10 <sup>-2</sup> |
| d_Bacteria;p_Proteobacteria;c_Alphaproteobacteria;o_Rhizobiales;f_Pleomorphomonadaceae;g_Pleomorphomonas | FEF <sub>25</sub>     | -1.3 (-2.66, 0.07)   | 6.7×10 <sup>-2</sup> |
| d_Bacteria;p_Proteobacteria;c_Alphaproteobacteria;o_Rhizobiales;f_Pleomorphomonadaceae;g_Pleomorphomonas | FEF <sub>50</sub>     | -1.45 (-2.98, 0.11)  | 7.2×10 <sup>-2</sup> |
| d_Bacteria;p_Proteobacteria;c_Alphaproteobacteria;o_Rhizobiales;f_Pleomorphomonadaceae;g_Pleomorphomonas | FEF <sub>75</sub>     | -2.38 (-4.19, -0.53) | 1.4×10 <sup>-2</sup> |
| d_Bacteria;p_Proteobacteria;c_Alphaproteobacteria;o_Rhizobiales;f_Rhizobiaceae;g_Allorhizobium           | FVC                   | 0.1 (-0.65, 0.85)    | 8.0×10 <sup>-1</sup> |
| d_Bacteria;p_Proteobacteria;c_Alphaproteobacteria;o_Rhizobiales;f_Rhizobiaceae;g_Allorhizobium           | FEV <sub>1</sub>      | 0.09 (-0.54, 0.71)   | 7.9×10 <sup>-1</sup> |
| d_Bacteria;p_Proteobacteria;c_Alphaproteobacteria;o_Rhizobiales;f_Rhizobiaceae;g_Allorhizobium           | FEV <sub>1</sub> /FVC | 0.04 (-0.53, 0.62)   | 8.8×10 <sup>-1</sup> |
| d_Bacteria;p_Proteobacteria;c_Alphaproteobacteria;o_Rhizobiales;f_Rhizobiaceae;g_Allorhizobium           | PEF                   | 1.14 (-0.48, 2.79)   | 1.7×10 <sup>-1</sup> |

|                                                                                                              |                       |                     |                      |
|--------------------------------------------------------------------------------------------------------------|-----------------------|---------------------|----------------------|
| d_Bacteria;p_Proteobacteria;c_Alphaproteobacteria;o_Rhizobiales;f_Rhizobiaceae;g_Allorhizobium               | FEF <sub>25-75</sub>  | 0.84 (-0.91, 2.62)  | 3.5×10 <sup>-1</sup> |
| d_Bacteria;p_Proteobacteria;c_Alphaproteobacteria;o_Rhizobiales;f_Rhizobiaceae;g_Allorhizobium               | FEF <sub>25</sub>     | 0.77 (-0.9, 2.48)   | 3.7×10 <sup>-1</sup> |
| d_Bacteria;p_Proteobacteria;c_Alphaproteobacteria;o_Rhizobiales;f_Rhizobiaceae;g_Allorhizobium               | FEF <sub>50</sub>     | 0.96 (-0.89, 2.85)  | 3.1×10 <sup>-1</sup> |
| d_Bacteria;p_Proteobacteria;c_Alphaproteobacteria;o_Rhizobiales;f_Rhizobiaceae;g_Allorhizobium               | FEF <sub>75</sub>     | 0.43 (-1.79, 2.71)  | 7.1×10 <sup>-1</sup> |
| d_Bacteria;p_Proteobacteria;c_Alphaproteobacteria;o_Rhizobiales;f_Rhizobiales_Incertae_Sedis;g_Phreatobacter | FVC                   | 0.41 (-0.28, 1.1)   | 2.5×10 <sup>-1</sup> |
| d_Bacteria;p_Proteobacteria;c_Alphaproteobacteria;o_Rhizobiales;f_Rhizobiales_Incertae_Sedis;g_Phreatobacter | FEV <sub>1</sub>      | 0.79 (0.26, 1.33)   | 4.8×10 <sup>-3</sup> |
| d_Bacteria;p_Proteobacteria;c_Alphaproteobacteria;o_Rhizobiales;f_Rhizobiales_Incertae_Sedis;g_Phreatobacter | FEV <sub>1</sub> /FVC | 0.13 (-0.4, 0.66)   | 6.4×10 <sup>-1</sup> |
| d_Bacteria;p_Proteobacteria;c_Alphaproteobacteria;o_Rhizobiales;f_Rhizobiales_Incertae_Sedis;g_Phreatobacter | PEF                   | 1.23 (-0.24, 2.72)  | 1.1×10 <sup>-1</sup> |
| d_Bacteria;p_Proteobacteria;c_Alphaproteobacteria;o_Rhizobiales;f_Rhizobiales_Incertae_Sedis;g_Phreatobacter | FEF <sub>25-75</sub>  | 1.25 (-0.34, 2.86)  | 1.3×10 <sup>-1</sup> |
| d_Bacteria;p_Proteobacteria;c_Alphaproteobacteria;o_Rhizobiales;f_Rhizobiales_Incertae_Sedis;g_Phreatobacter | FEF <sub>25</sub>     | 1.5 (0, 3.02)       | 5.3×10 <sup>-2</sup> |
| d_Bacteria;p_Proteobacteria;c_Alphaproteobacteria;o_Rhizobiales;f_Rhizobiales_Incertae_Sedis;g_Phreatobacter | FEF <sub>50</sub>     | 1.27 (-0.42, 2.99)  | 1.5×10 <sup>-1</sup> |
| d_Bacteria;p_Proteobacteria;c_Alphaproteobacteria;o_Rhizobiales;f_Rhizobiales_Incertae_Sedis;g_Phreatobacter | FEF <sub>75</sub>     | 0.83 (-1.23, 2.94)  | 4.4×10 <sup>-1</sup> |
| d_Bacteria;p_Proteobacteria;c_Alphaproteobacteria;o_Rhizobiales;f_Xanthobacteraceae;g_Bradyrhizobium         | FVC                   | 0.41 (-0.23, 1.05)  | 2.1×10 <sup>-1</sup> |
| d_Bacteria;p_Proteobacteria;c_Alphaproteobacteria;o_Rhizobiales;f_Xanthobacteraceae;g_Bradyrhizobium         | FEV <sub>1</sub>      | 0.43 (-0.09, 0.96)  | 1.1×10 <sup>-1</sup> |
| d_Bacteria;p_Proteobacteria;c_Alphaproteobacteria;o_Rhizobiales;f_Xanthobacteraceae;g_Bradyrhizobium         | FEV <sub>1</sub> /FVC | -0.01 (-0.52, 0.5)  | 9.7×10 <sup>-1</sup> |
| d_Bacteria;p_Proteobacteria;c_Alphaproteobacteria;o_Rhizobiales;f_Xanthobacteraceae;g_Bradyrhizobium         | PEF                   | 0.44 (-0.98, 1.89)  | 5.5×10 <sup>-1</sup> |
| d_Bacteria;p_Proteobacteria;c_Alphaproteobacteria;o_Rhizobiales;f_Xanthobacteraceae;g_Bradyrhizobium         | FEF <sub>25-75</sub>  | 0.21 (-1.34, 1.78)  | 7.9×10 <sup>-1</sup> |
| d_Bacteria;p_Proteobacteria;c_Alphaproteobacteria;o_Rhizobiales;f_Xanthobacteraceae;g_Bradyrhizobium         | FEF <sub>25</sub>     | 0.11 (-1.35, 1.59)  | 8.8×10 <sup>-1</sup> |
| d_Bacteria;p_Proteobacteria;c_Alphaproteobacteria;o_Rhizobiales;f_Xanthobacteraceae;g_Bradyrhizobium         | FEF <sub>50</sub>     | 0.02 (-1.62, 1.69)  | 9.8×10 <sup>-1</sup> |
| d_Bacteria;p_Proteobacteria;c_Alphaproteobacteria;o_Rhizobiales;f_Xanthobacteraceae;g_Bradyrhizobium         | FEF <sub>75</sub>     | 0.31 (-1.69, 2.35)  | 7.6×10 <sup>-1</sup> |
| d_Bacteria;p_Proteobacteria;c_Alphaproteobacteria;o_Rhizobiales;f_Xanthobacteraceae;g_Pseudolabrys           | FVC                   | 0.38 (-0.38, 1.16)  | 3.3×10 <sup>-1</sup> |
| d_Bacteria;p_Proteobacteria;c_Alphaproteobacteria;o_Rhizobiales;f_Xanthobacteraceae;g_Pseudolabrys           | FEV <sub>1</sub>      | -0.14 (-0.78, 0.5)  | 6.7×10 <sup>-1</sup> |
| d_Bacteria;p_Proteobacteria;c_Alphaproteobacteria;o_Rhizobiales;f_Xanthobacteraceae;g_Pseudolabrys           | FEV <sub>1</sub> /FVC | -0.44 (-1.01, 0.14) | 1.4×10 <sup>-1</sup> |
| d_Bacteria;p_Proteobacteria;c_Alphaproteobacteria;o_Rhizobiales;f_Xanthobacteraceae;g_Pseudolabrys           | PEF                   | 0.3 (-1.39, 2.01)   | 7.3×10 <sup>-1</sup> |
| d_Bacteria;p_Proteobacteria;c_Alphaproteobacteria;o_Rhizobiales;f_Xanthobacteraceae;g_Pseudolabrys           | FEF <sub>25-75</sub>  | -0.4 (-2.19, 1.42)  | 6.7×10 <sup>-1</sup> |
| d_Bacteria;p_Proteobacteria;c_Alphaproteobacteria;o_Rhizobiales;f_Xanthobacteraceae;g_Pseudolabrys           | FEF <sub>25</sub>     | -0.62 (-2.32, 1.12) | 4.9×10 <sup>-1</sup> |
| d_Bacteria;p_Proteobacteria;c_Alphaproteobacteria;o_Rhizobiales;f_Xanthobacteraceae;g_Pseudolabrys           | FEF <sub>50</sub>     | -0.32 (-2.22, 1.61) | 7.4×10 <sup>-1</sup> |
| d_Bacteria;p_Proteobacteria;c_Alphaproteobacteria;o_Rhizobiales;f_Xanthobacteraceae;g_Pseudolabrys           | FEF <sub>75</sub>     | -1.09 (-3.33, 1.21) | 3.5×10 <sup>-1</sup> |
| d_Bacteria;p_Proteobacteria;c_Alphaproteobacteria;o_Rhizobiales;f_Xanthobacteraceae;g_Rhodopseudomonas       | FVC                   | 0.38 (-0.25, 1.02)  | 2.4×10 <sup>-1</sup> |
| d_Bacteria;p_Proteobacteria;c_Alphaproteobacteria;o_Rhizobiales;f_Xanthobacteraceae;g_Rhodopseudomonas       | FEV <sub>1</sub>      | 0.04 (-0.48, 0.57)  | 8.8×10 <sup>-1</sup> |
| d_Bacteria;p_Proteobacteria;c_Alphaproteobacteria;o_Rhizobiales;f_Xanthobacteraceae;g_Rhodopseudomonas       | FEV <sub>1</sub> /FVC | -0.28 (-0.78, 0.21) | 2.7×10 <sup>-1</sup> |
| d_Bacteria;p_Proteobacteria;c_Alphaproteobacteria;o_Rhizobiales;f_Xanthobacteraceae;g_Rhodopseudomonas       | PEF                   | -0.09 (-1.49, 1.33) | 9.0×10 <sup>-1</sup> |
| d_Bacteria;p_Proteobacteria;c_Alphaproteobacteria;o_Rhizobiales;f_Xanthobacteraceae;g_Rhodopseudomonas       | FEF <sub>25-75</sub>  | -1.21 (-2.68, 0.29) | 1.2×10 <sup>-1</sup> |
| d_Bacteria;p_Proteobacteria;c_Alphaproteobacteria;o_Rhizobiales;f_Xanthobacteraceae;g_Rhodopseudomonas       | FEF <sub>25</sub>     | -0.74 (-2.15, 0.7)  | 3.1×10 <sup>-1</sup> |
| d_Bacteria;p_Proteobacteria;c_Alphaproteobacteria;o_Rhizobiales;f_Xanthobacteraceae;g_Rhodopseudomonas       | FEF <sub>50</sub>     | -1.44 (-2.99, 0.14) | 7.9×10 <sup>-2</sup> |
| d_Bacteria;p_Proteobacteria;c_Alphaproteobacteria;o_Rhizobiales;f_Xanthobacteraceae;g_Rhodopseudomonas       | FEF <sub>75</sub>     | -1.57 (-3.45, 0.36) | 1.1×10 <sup>-1</sup> |
| d_Bacteria;p_Proteobacteria;c_Alphaproteobacteria;o_Rhodobacterales;f_Rhodobacteraceae;g_Paracoccus          | FVC                   | 0.29 (-0.43, 1.02)  | 4.3×10 <sup>-1</sup> |
| d_Bacteria;p_Proteobacteria;c_Alphaproteobacteria;o_Rhodobacterales;f_Rhodobacteraceae;g_Paracoccus          | FEV <sub>1</sub>      | 0.71 (0.13, 1.29)   | 1.9×10 <sup>-2</sup> |
| d_Bacteria;p_Proteobacteria;c_Alphaproteobacteria;o_Rhodobacterales;f_Rhodobacteraceae;g_Paracoccus          | FEV <sub>1</sub> /FVC | 0.18 (-0.37, 0.74)  | 5.1×10 <sup>-1</sup> |
| d_Bacteria;p_Proteobacteria;c_Alphaproteobacteria;o_Rhodobacterales;f_Rhodobacteraceae;g_Paracoccus          | PEF                   | 1.78 (0.25, 3.32)   | 2.5×10 <sup>-2</sup> |
| d_Bacteria;p_Proteobacteria;c_Alphaproteobacteria;o_Rhodobacterales;f_Rhodobacteraceae;g_Paracoccus          | FEF <sub>25-75</sub>  | 1.03 (-0.64, 2.74)  | 2.3×10 <sup>-1</sup> |
| d_Bacteria;p_Proteobacteria;c_Alphaproteobacteria;o_Rhodobacterales;f_Rhodobacteraceae;g_Paracoccus          | FEF <sub>25</sub>     | 1.72 (0.15, 3.32)   | 3.5×10 <sup>-2</sup> |
| d_Bacteria;p_Proteobacteria;c_Alphaproteobacteria;o_Rhodobacterales;f_Rhodobacteraceae;g_Paracoccus          | FEF <sub>50</sub>     | 1.14 (-0.64, 2.95)  | 2.1×10 <sup>-1</sup> |
| d_Bacteria;p_Proteobacteria;c_Alphaproteobacteria;o_Rhodobacterales;f_Rhodobacteraceae;g_Paracoccus          | FEF <sub>75</sub>     | 0.64 (-1.51, 2.84)  | 5.6×10 <sup>-1</sup> |
| d_Bacteria;p_Proteobacteria;c_Alphaproteobacteria;o_Sphingomonadales;f_Sphingomonadaceae;g_Novosphingobium   | FVC                   | 0.58 (-0.05, 1.22)  | 7.7×10 <sup>-2</sup> |
| d_Bacteria;p_Proteobacteria;c_Alphaproteobacteria;o_Sphingomonadales;f_Sphingomonadaceae;g_Novosphingobium   | FEV <sub>1</sub>      | 0.13 (-0.4, 0.66)   | 6.4×10 <sup>-1</sup> |
| d_Bacteria;p_Proteobacteria;c_Alphaproteobacteria;o_Sphingomonadales;f_Sphingomonadaceae;g_Novosphingobium   | FEV <sub>1</sub> /FVC | -0.34 (-0.83, 0.15) | 1.7×10 <sup>-1</sup> |
| d_Bacteria;p_Proteobacteria;c_Alphaproteobacteria;o_Sphingomonadales;f_Sphingomonadaceae;g_Novosphingobium   | PEF                   | 0.17 (-1.22, 1.58)  | 8.1×10 <sup>-1</sup> |

|                                                                                                               |                       |                      |                      |
|---------------------------------------------------------------------------------------------------------------|-----------------------|----------------------|----------------------|
| d_Bacteria;p_Proteobacteria;c_Alphaproteobacteria;o_Sphingomonadales;f_Sphingomonadaceae;g_Novosphingobium    | FEF <sub>25-75</sub>  | -0.08 (-1.57, 1.44)  | 9.2×10 <sup>-1</sup> |
| d_Bacteria;p_Proteobacteria;c_Alphaproteobacteria;o_Sphingomonadales;f_Sphingomonadaceae;g_Novosphingobium    | FEF <sub>25</sub>     | -0.1 (-1.52, 1.34)   | 8.9×10 <sup>-1</sup> |
| d_Bacteria;p_Proteobacteria;c_Alphaproteobacteria;o_Sphingomonadales;f_Sphingomonadaceae;g_Novosphingobium    | FEF <sub>50</sub>     | 0.02 (-1.57, 1.63)   | 9.8×10 <sup>-1</sup> |
| d_Bacteria;p_Proteobacteria;c_Alphaproteobacteria;o_Sphingomonadales;f_Sphingomonadaceae;g_Novosphingobium    | FEF <sub>75</sub>     | -0.63 (-2.53, 1.3)   | 5.2×10 <sup>-1</sup> |
| d_Bacteria;p_Proteobacteria;c_Alphaproteobacteria;o_Sphingomonadales;f_Sphingomonadaceae;g_Sphingomonas       | FVC                   | 0.63 (-0.08, 1.35)   | 8.8×10 <sup>-2</sup> |
| d_Bacteria;p_Proteobacteria;c_Alphaproteobacteria;o_Sphingomonadales;f_Sphingomonadaceae;g_Sphingomonas       | FEV <sub>1</sub>      | 0.07 (-0.53, 0.67)   | 8.3×10 <sup>-1</sup> |
| d_Bacteria;p_Proteobacteria;c_Alphaproteobacteria;o_Sphingomonadales;f_Sphingomonadaceae;g_Sphingomonas       | FEV <sub>1</sub> /FVC | -0.7 (-1.24, -0.16)  | 1.3×10 <sup>-2</sup> |
| d_Bacteria;p_Proteobacteria;c_Alphaproteobacteria;o_Sphingomonadales;f_Sphingomonadaceae;g_Sphingomonas       | PEF                   | 0.03 (-1.55, 1.63)   | 9.7×10 <sup>-1</sup> |
| d_Bacteria;p_Proteobacteria;c_Alphaproteobacteria;o_Sphingomonadales;f_Sphingomonadaceae;g_Sphingomonas       | FEF <sub>25-75</sub>  | -0.96 (-2.63, 0.74)  | 2.7×10 <sup>-1</sup> |
| d_Bacteria;p_Proteobacteria;c_Alphaproteobacteria;o_Sphingomonadales;f_Sphingomonadaceae;g_Sphingomonas       | FEF <sub>25</sub>     | -0.56 (-2.16, 1.07)  | 5.0×10 <sup>-1</sup> |
| d_Bacteria;p_Proteobacteria;c_Alphaproteobacteria;o_Sphingomonadales;f_Sphingomonadaceae;g_Sphingomonas       | FEF <sub>50</sub>     | -0.94 (-2.71, 0.87)  | 3.1×10 <sup>-1</sup> |
| d_Bacteria;p_Proteobacteria;c_Alphaproteobacteria;o_Sphingomonadales;f_Sphingomonadaceae;g_Sphingomonas       | FEF <sub>75</sub>     | -1.81 (-3.91, 0.34)  | 1.0×10 <sup>-1</sup> |
| d_Bacteria;p_Proteobacteria;c_Gammaproteobacteria;o_Aeromonadales;f_Aeromonadaceae;g_Tolunomas                | FVC                   | 0.36 (-0.24, 0.96)   | 2.4×10 <sup>-1</sup> |
| d_Bacteria;p_Proteobacteria;c_Gammaproteobacteria;o_Aeromonadales;f_Aeromonadaceae;g_Tolunomas                | FEV <sub>1</sub>      | -0.44 (-0.92, 0.04)  | 7.9×10 <sup>-2</sup> |
| d_Bacteria;p_Proteobacteria;c_Gammaproteobacteria;o_Aeromonadales;f_Aeromonadaceae;g_Tolunomas                | FEV <sub>1</sub> /FVC | -0.63 (-1.06, -0.2)  | 5.1×10 <sup>-3</sup> |
| d_Bacteria;p_Proteobacteria;c_Gammaproteobacteria;o_Aeromonadales;f_Aeromonadaceae;g_Tolunomas                | PEF                   | -0.58 (-1.86, 0.71)  | 3.8×10 <sup>-1</sup> |
| d_Bacteria;p_Proteobacteria;c_Gammaproteobacteria;o_Aeromonadales;f_Aeromonadaceae;g_Tolunomas                | FEF <sub>25-75</sub>  | -1.58 (-2.9, -0.25)  | 2.2×10 <sup>-2</sup> |
| d_Bacteria;p_Proteobacteria;c_Gammaproteobacteria;o_Aeromonadales;f_Aeromonadaceae;g_Tolunomas                | FEF <sub>25</sub>     | -0.73 (-2.04, 0.6)   | 2.8×10 <sup>-1</sup> |
| d_Bacteria;p_Proteobacteria;c_Gammaproteobacteria;o_Aeromonadales;f_Aeromonadaceae;g_Tolunomas                | FEF <sub>50</sub>     | -1.64 (-3.03, -0.22) | 2.6×10 <sup>-2</sup> |
| d_Bacteria;p_Proteobacteria;c_Gammaproteobacteria;o_Aeromonadales;f_Aeromonadaceae;g_Tolunomas                | FEF <sub>75</sub>     | -2.31 (-3.97, -0.63) | 8.6×10 <sup>-3</sup> |
| d_Bacteria;p_Proteobacteria;c_Gammaproteobacteria;o_Betaproteobacteriales;f_Burkholderiaceae;g_Acidovorax     | FVC                   | 0.14 (-0.6, 0.89)    | 7.1×10 <sup>-1</sup> |
| d_Bacteria;p_Proteobacteria;c_Gammaproteobacteria;o_Betaproteobacteriales;f_Burkholderiaceae;g_Acidovorax     | FEV <sub>1</sub>      | 0.13 (-0.48, 0.75)   | 6.8×10 <sup>-1</sup> |
| d_Bacteria;p_Proteobacteria;c_Gammaproteobacteria;o_Betaproteobacteriales;f_Burkholderiaceae;g_Acidovorax     | FEV <sub>1</sub> /FVC | -0.06 (-0.63, 0.52)  | 8.5×10 <sup>-1</sup> |
| d_Bacteria;p_Proteobacteria;c_Gammaproteobacteria;o_Betaproteobacteriales;f_Burkholderiaceae;g_Acidovorax     | PEF                   | -1.28 (-2.86, 0.33)  | 1.2×10 <sup>-1</sup> |
| d_Bacteria;p_Proteobacteria;c_Gammaproteobacteria;o_Betaproteobacteriales;f_Burkholderiaceae;g_Acidovorax     | FEF <sub>25-75</sub>  | -0.77 (-2.5, 0.99)   | 3.9×10 <sup>-1</sup> |
| d_Bacteria;p_Proteobacteria;c_Gammaproteobacteria;o_Betaproteobacteriales;f_Burkholderiaceae;g_Acidovorax     | FEF <sub>25</sub>     | -0.94 (-2.58, 0.72)  | 2.7×10 <sup>-1</sup> |
| d_Bacteria;p_Proteobacteria;c_Gammaproteobacteria;o_Betaproteobacteriales;f_Burkholderiaceae;g_Acidovorax     | FEF <sub>50</sub>     | -0.55 (-2.39, 1.32)  | 5.6×10 <sup>-1</sup> |
| d_Bacteria;p_Proteobacteria;c_Gammaproteobacteria;o_Betaproteobacteriales;f_Burkholderiaceae;g_Acidovorax     | FEF <sub>75</sub>     | -0.73 (-2.94, 1.54)  | 5.3×10 <sup>-1</sup> |
| d_Bacteria;p_Proteobacteria;c_Gammaproteobacteria;o_Betaproteobacteriales;f_Burkholderiaceae;g_Aquabacterium  | FVC                   | 0.25 (-0.35, 0.86)   | 4.2×10 <sup>-1</sup> |
| d_Bacteria;p_Proteobacteria;c_Gammaproteobacteria;o_Betaproteobacteriales;f_Burkholderiaceae;g_Aquabacterium  | FEV <sub>1</sub>      | -0.07 (-0.58, 0.44)  | 7.8×10 <sup>-1</sup> |
| d_Bacteria;p_Proteobacteria;c_Gammaproteobacteria;o_Betaproteobacteriales;f_Burkholderiaceae;g_Aquabacterium  | FEV <sub>1</sub> /FVC | -0.16 (-0.62, 0.31)  | 5.2×10 <sup>-1</sup> |
| d_Bacteria;p_Proteobacteria;c_Gammaproteobacteria;o_Betaproteobacteriales;f_Burkholderiaceae;g_Aquabacterium  | PEF                   | -1.09 (-2.38, 0.23)  | 1.1×10 <sup>-1</sup> |
| d_Bacteria;p_Proteobacteria;c_Gammaproteobacteria;o_Betaproteobacteriales;f_Burkholderiaceae;g_Aquabacterium  | FEF <sub>25-75</sub>  | -0.75 (-2.15, 0.68)  | 3.0×10 <sup>-1</sup> |
| d_Bacteria;p_Proteobacteria;c_Gammaproteobacteria;o_Betaproteobacteriales;f_Burkholderiaceae;g_Aquabacterium  | FEF <sub>25</sub>     | -0.99 (-2.33, 0.36)  | 1.5×10 <sup>-1</sup> |
| d_Bacteria;p_Proteobacteria;c_Gammaproteobacteria;o_Betaproteobacteriales;f_Burkholderiaceae;g_Aquabacterium  | FEF <sub>50</sub>     | -1.03 (-2.51, 0.47)  | 1.8×10 <sup>-1</sup> |
| d_Bacteria;p_Proteobacteria;c_Gammaproteobacteria;o_Betaproteobacteriales;f_Burkholderiaceae;g_Aquabacterium  | FEF <sub>75</sub>     | -0.57 (-2.38, 1.28)  | 5.5×10 <sup>-1</sup> |
| d_Bacteria;p_Proteobacteria;c_Gammaproteobacteria;o_Betaproteobacteriales;f_Burkholderiaceae;g_Hydrogenophaga | FVC                   | 0.83 (0.08, 1.58)    | 3.2×10 <sup>-2</sup> |
| d_Bacteria;p_Proteobacteria;c_Gammaproteobacteria;o_Betaproteobacteriales;f_Burkholderiaceae;g_Hydrogenophaga | FEV <sub>1</sub>      | -0.03 (-0.67, 0.6)   | 9.2×10 <sup>-1</sup> |
| d_Bacteria;p_Proteobacteria;c_Gammaproteobacteria;o_Betaproteobacteriales;f_Burkholderiaceae;g_Hydrogenophaga | FEV <sub>1</sub> /FVC | -0.69 (-1.22, -0.15) | 1.5×10 <sup>-2</sup> |
| d_Bacteria;p_Proteobacteria;c_Gammaproteobacteria;o_Betaproteobacteriales;f_Burkholderiaceae;g_Hydrogenophaga | PEF                   | -2.1 (-3.6, -0.56)   | 8.9×10 <sup>-3</sup> |
| d_Bacteria;p_Proteobacteria;c_Gammaproteobacteria;o_Betaproteobacteriales;f_Burkholderiaceae;g_Hydrogenophaga | FEF <sub>25-75</sub>  | -1.79 (-3.44, -0.12) | 3.9×10 <sup>-2</sup> |
| d_Bacteria;p_Proteobacteria;c_Gammaproteobacteria;o_Betaproteobacteriales;f_Burkholderiaceae;g_Hydrogenophaga | FEF <sub>25</sub>     | -2.16 (-3.72, -0.58) | 9.1×10 <sup>-3</sup> |
| d_Bacteria;p_Proteobacteria;c_Gammaproteobacteria;o_Betaproteobacteriales;f_Burkholderiaceae;g_Hydrogenophaga | FEF <sub>50</sub>     | -1.9 (-3.64, -0.14)  | 3.8×10 <sup>-2</sup> |
| d_Bacteria;p_Proteobacteria;c_Gammaproteobacteria;o_Betaproteobacteriales;f_Burkholderiaceae;g_Hydrogenophaga | FEF <sub>75</sub>     | -1.81 (-3.91, 0.35)  | 1.0×10 <sup>-1</sup> |
| d_Bacteria;p_Proteobacteria;c_Gammaproteobacteria;o_Betaproteobacteriales;f_Burkholderiaceae;g_Massilia       | FVC                   | 0.39 (-0.51, 1.3)    | 4.0×10 <sup>-1</sup> |
| d_Bacteria;p_Proteobacteria;c_Gammaproteobacteria;o_Betaproteobacteriales;f_Burkholderiaceae;g_Massilia       | FEV <sub>1</sub>      | 1.06 (0.35, 1.78)    | 4.5×10 <sup>-3</sup> |
| d_Bacteria;p_Proteobacteria;c_Gammaproteobacteria;o_Betaproteobacteriales;f_Burkholderiaceae;g_Massilia       | FEV <sub>1</sub> /FVC | 0.45 (-0.22, 1.13)   | 1.9×10 <sup>-1</sup> |
| d_Bacteria;p_Proteobacteria;c_Gammaproteobacteria;o_Betaproteobacteriales;f_Burkholderiaceae;g_Massilia       | PEF                   | 1.68 (-0.24, 3.65)   | 9.1×10 <sup>-2</sup> |

|                                                                                                            |                       |                      |                       |
|------------------------------------------------------------------------------------------------------------|-----------------------|----------------------|-----------------------|
| d_Bacteria;p_Proteobacteria;c_Gammaproteobacteria;o_Betaproteobacteriales;f_Burkholderiaceae;g_Massilia    | FEF <sub>25-75</sub>  | 1.96 (-0.11, 4.08)   | 6.7×10 <sup>-2</sup>  |
| d_Bacteria;p_Proteobacteria;c_Gammaproteobacteria;o_Betaproteobacteriales;f_Burkholderiaceae;g_Massilia    | FEF <sub>25</sub>     | 1.3 (-0.7, 3.34)     | 2.1×10 <sup>-1</sup>  |
| d_Bacteria;p_Proteobacteria;c_Gammaproteobacteria;o_Betaproteobacteriales;f_Burkholderiaceae;g_Massilia    | FEF <sub>50</sub>     | 1.65 (-0.55, 3.9)    | 1.5×10 <sup>-1</sup>  |
| d_Bacteria;p_Proteobacteria;c_Gammaproteobacteria;o_Betaproteobacteriales;f_Burkholderiaceae;g_Massilia    | FEF <sub>75</sub>     | 2.55 (-0.11, 5.28)   | 6.3×10 <sup>-2</sup>  |
| d_Bacteria;p_Proteobacteria;c_Gammaproteobacteria;o_Betaproteobacteriales;f_Burkholderiaceae;g_Ralstonia   | FVC                   | 0.06 (-0.62, 0.75)   | 8.6×10 <sup>-1</sup>  |
| d_Bacteria;p_Proteobacteria;c_Gammaproteobacteria;o_Betaproteobacteriales;f_Burkholderiaceae;g_Ralstonia   | FEV <sub>1</sub>      | 0.42 (-0.13, 0.98)   | 1.4×10 <sup>-1</sup>  |
| d_Bacteria;p_Proteobacteria;c_Gammaproteobacteria;o_Betaproteobacteriales;f_Burkholderiaceae;g_Ralstonia   | FEV <sub>1</sub> /FVC | 0.3 (-0.22, 0.83)    | 2.6×10 <sup>-1</sup>  |
| d_Bacteria;p_Proteobacteria;c_Gammaproteobacteria;o_Betaproteobacteriales;f_Burkholderiaceae;g_Ralstonia   | PEF                   | 1.33 (-0.13, 2.81)   | 7.8×10 <sup>-2</sup>  |
| d_Bacteria;p_Proteobacteria;c_Gammaproteobacteria;o_Betaproteobacteriales;f_Burkholderiaceae;g_Ralstonia   | FEF <sub>25-75</sub>  | 1.53 (-0.05, 3.13)   | 6.1×10 <sup>-2</sup>  |
| d_Bacteria;p_Proteobacteria;c_Gammaproteobacteria;o_Betaproteobacteriales;f_Burkholderiaceae;g_Ralstonia   | FEF <sub>25</sub>     | 1.19 (-0.32, 2.72)   | 1.3×10 <sup>-1</sup>  |
| d_Bacteria;p_Proteobacteria;c_Gammaproteobacteria;o_Betaproteobacteriales;f_Burkholderiaceae;g_Ralstonia   | FEF <sub>50</sub>     | 1.54 (-0.13, 3.24)   | 7.5×10 <sup>-2</sup>  |
| d_Bacteria;p_Proteobacteria;c_Gammaproteobacteria;o_Betaproteobacteriales;f_Burkholderiaceae;g_Ralstonia   | FEF <sub>75</sub>     | 1.7 (-0.34, 3.79)    | 1.1×10 <sup>-1</sup>  |
| d_Bacteria;p_Proteobacteria;c_Gammaproteobacteria;o_Betaproteobacteriales;f_Burkholderiaceae;g_Tepidimonas | FVC                   | -0.23 (-1.11, 0.66)  | 6.2×10 <sup>-1</sup>  |
| d_Bacteria;p_Proteobacteria;c_Gammaproteobacteria;o_Betaproteobacteriales;f_Burkholderiaceae;g_Tepidimonas | FEV <sub>1</sub>      | -0.31 (-1.05, 0.44)  | 4.2×10 <sup>-1</sup>  |
| d_Bacteria;p_Proteobacteria;c_Gammaproteobacteria;o_Betaproteobacteriales;f_Burkholderiaceae;g_Tepidimonas | FEV <sub>1</sub> /FVC | 0.11 (-0.54, 0.77)   | 7.3×10 <sup>-1</sup>  |
| d_Bacteria;p_Proteobacteria;c_Gammaproteobacteria;o_Betaproteobacteriales;f_Burkholderiaceae;g_Tepidimonas | PEF                   | -0.86 (-2.73, 1.05)  | 3.8×10 <sup>-1</sup>  |
| d_Bacteria;p_Proteobacteria;c_Gammaproteobacteria;o_Betaproteobacteriales;f_Burkholderiaceae;g_Tepidimonas | FEF <sub>25-75</sub>  | -0.52 (-2.52, 1.52)  | 6.1×10 <sup>-1</sup>  |
| d_Bacteria;p_Proteobacteria;c_Gammaproteobacteria;o_Betaproteobacteriales;f_Burkholderiaceae;g_Tepidimonas | FEF <sub>25</sub>     | -0.21 (-2.17, 1.79)  | 8.4×10 <sup>-1</sup>  |
| d_Bacteria;p_Proteobacteria;c_Gammaproteobacteria;o_Betaproteobacteriales;f_Burkholderiaceae;g_Tepidimonas | FEF <sub>50</sub>     | -0.81 (-2.91, 1.33)  | 4.6×10 <sup>-1</sup>  |
| d_Bacteria;p_Proteobacteria;c_Gammaproteobacteria;o_Betaproteobacteriales;f_Burkholderiaceae;g_Tepidimonas | FEF <sub>75</sub>     | 0.14 (-2.4, 2.75)    | 9.1×10 <sup>-1</sup>  |
| d_Bacteria;p_Proteobacteria;c_Gammaproteobacteria;o_Betaproteobacteriales;f_Rhodocyclaceae;g_Dechloromonas | FVC                   | 0.5 (-0.21, 1.22)    | 1.7×10 <sup>-1</sup>  |
| d_Bacteria;p_Proteobacteria;c_Gammaproteobacteria;o_Betaproteobacteriales;f_Rhodocyclaceae;g_Dechloromonas | FEV <sub>1</sub>      | -0.07 (-0.67, 0.54)  | 8.3×10 <sup>-1</sup>  |
| d_Bacteria;p_Proteobacteria;c_Gammaproteobacteria;o_Betaproteobacteriales;f_Rhodocyclaceae;g_Dechloromonas | FEV <sub>1</sub> /FVC | -0.43 (-0.97, 0.11)  | 1.3×10 <sup>-1</sup>  |
| d_Bacteria;p_Proteobacteria;c_Gammaproteobacteria;o_Betaproteobacteriales;f_Rhodocyclaceae;g_Dechloromonas | PEF                   | -2.01 (-3.48, -0.52) | 1.0×10 <sup>-2</sup>  |
| d_Bacteria;p_Proteobacteria;c_Gammaproteobacteria;o_Betaproteobacteriales;f_Rhodocyclaceae;g_Dechloromonas | FEF <sub>25-75</sub>  | -1.04 (-2.69, 0.64)  | 2.3×10 <sup>-1</sup>  |
| d_Bacteria;p_Proteobacteria;c_Gammaproteobacteria;o_Betaproteobacteriales;f_Rhodocyclaceae;g_Dechloromonas | FEF <sub>25</sub>     | -1.69 (-3.22, -0.14) | 3.6×10 <sup>-2</sup>  |
| d_Bacteria;p_Proteobacteria;c_Gammaproteobacteria;o_Betaproteobacteriales;f_Rhodocyclaceae;g_Dechloromonas | FEF <sub>50</sub>     | -1.1 (-2.85, 0.68)   | 2.3×10 <sup>-1</sup>  |
| d_Bacteria;p_Proteobacteria;c_Gammaproteobacteria;o_Betaproteobacteriales;f_Rhodocyclaceae;g_Dechloromonas | FEF <sub>75</sub>     | -1.07 (-3.18, 1.08)  | 3.3×10 <sup>-1</sup>  |
| d_Bacteria;p_Proteobacteria;c_Gammaproteobacteria;o_Betaproteobacteriales;f_Rhodocyclaceae;g_Zoogloea      | FVC                   | 0 (-0.69, 0.7)       | 9.97×10 <sup>-1</sup> |
| d_Bacteria;p_Proteobacteria;c_Gammaproteobacteria;o_Betaproteobacteriales;f_Rhodocyclaceae;g_Zoogloea      | FEV <sub>1</sub>      | -0.15 (-0.71, 0.43)  | 6.2×10 <sup>-1</sup>  |
| d_Bacteria;p_Proteobacteria;c_Gammaproteobacteria;o_Betaproteobacteriales;f_Rhodocyclaceae;g_Zoogloea      | FEV <sub>1</sub> /FVC | 0.02 (-0.53, 0.57)   | 9.5×10 <sup>-1</sup>  |
| d_Bacteria;p_Proteobacteria;c_Gammaproteobacteria;o_Betaproteobacteriales;f_Rhodocyclaceae;g_Zoogloea      | PEF                   | -1.06 (-2.54, 0.44)  | 1.7×10 <sup>-1</sup>  |
| d_Bacteria;p_Proteobacteria;c_Gammaproteobacteria;o_Betaproteobacteriales;f_Rhodocyclaceae;g_Zoogloea      | FEF <sub>25-75</sub>  | -0.63 (-2.26, 1.02)  | 4.5×10 <sup>-1</sup>  |
| d_Bacteria;p_Proteobacteria;c_Gammaproteobacteria;o_Betaproteobacteriales;f_Rhodocyclaceae;g_Zoogloea      | FEF <sub>25</sub>     | -0.93 (-2.45, 0.62)  | 2.4×10 <sup>-1</sup>  |
| d_Bacteria;p_Proteobacteria;c_Gammaproteobacteria;o_Betaproteobacteriales;f_Rhodocyclaceae;g_Zoogloea      | FEF <sub>50</sub>     | -0.77 (-2.49, 0.98)  | 3.9×10 <sup>-1</sup>  |
| d_Bacteria;p_Proteobacteria;c_Gammaproteobacteria;o_Betaproteobacteriales;f_Rhodocyclaceae;g_Zoogloea      | FEF <sub>75</sub>     | -0.34 (-2.44, 1.81)  | 7.6×10 <sup>-1</sup>  |
| d_Bacteria;p_Proteobacteria;c_Gammaproteobacteria;o_Enterobacteriales;f_Enterobacteriaceae;g_Klebsiella    | FVC                   | -1.18 (-2, -0.36)    | 6.4×10 <sup>-3</sup>  |
| d_Bacteria;p_Proteobacteria;c_Gammaproteobacteria;o_Enterobacteriales;f_Enterobacteriaceae;g_Klebsiella    | FEV <sub>1</sub>      | -0.07 (-0.73, 0.6)   | 8.5×10 <sup>-1</sup>  |
| d_Bacteria;p_Proteobacteria;c_Gammaproteobacteria;o_Enterobacteriales;f_Enterobacteriaceae;g_Klebsiella    | FEV <sub>1</sub> /FVC | 0.56 (-0.05, 1.18)   | 7.5×10 <sup>-2</sup>  |
| d_Bacteria;p_Proteobacteria;c_Gammaproteobacteria;o_Enterobacteriales;f_Enterobacteriaceae;g_Klebsiella    | PEF                   | -0.47 (-2.21, 1.31)  | 6.1×10 <sup>-1</sup>  |
| d_Bacteria;p_Proteobacteria;c_Gammaproteobacteria;o_Enterobacteriales;f_Enterobacteriaceae;g_Klebsiella    | FEF <sub>25-75</sub>  | 1.17 (-0.72, 3.09)   | 2.3×10 <sup>-1</sup>  |
| d_Bacteria;p_Proteobacteria;c_Gammaproteobacteria;o_Enterobacteriales;f_Enterobacteriaceae;g_Klebsiella    | FEF <sub>25</sub>     | 0.12 (-1.68, 1.95)   | 9.0×10 <sup>-1</sup>  |
| d_Bacteria;p_Proteobacteria;c_Gammaproteobacteria;o_Enterobacteriales;f_Enterobacteriaceae;g_Klebsiella    | FEF <sub>50</sub>     | 0.97 (-1.04, 3.02)   | 3.5×10 <sup>-1</sup>  |
| d_Bacteria;p_Proteobacteria;c_Gammaproteobacteria;o_Enterobacteriales;f_Enterobacteriaceae;g_Klebsiella    | FEF <sub>75</sub>     | 2.11 (-0.28, 4.55)   | 8.8×10 <sup>-2</sup>  |
| d_Bacteria;p_Proteobacteria;c_Gammaproteobacteria;o_Oceanospirillales;f_Halomonadaceae;g_Halomonas         | FVC                   | 0.64 (-0.19, 1.49)   | 1.3×10 <sup>-1</sup>  |
| d_Bacteria;p_Proteobacteria;c_Gammaproteobacteria;o_Oceanospirillales;f_Halomonadaceae;g_Halomonas         | FEV <sub>1</sub>      | 0.71 (0.02, 1.4)     | 4.7×10 <sup>-2</sup>  |
| d_Bacteria;p_Proteobacteria;c_Gammaproteobacteria;o_Oceanospirillales;f_Halomonadaceae;g_Halomonas         | FEV <sub>1</sub> /FVC | -0.1 (-0.73, 0.55)   | 7.7×10 <sup>-1</sup>  |
| d_Bacteria;p_Proteobacteria;c_Gammaproteobacteria;o_Oceanospirillales;f_Halomonadaceae;g_Halomonas         | PEF                   | 1.2 (-0.62, 3.05)    | 2.0×10 <sup>-1</sup>  |

|                                                                                                            |                       |                      |                      |
|------------------------------------------------------------------------------------------------------------|-----------------------|----------------------|----------------------|
| d_Bacteria;p_Proteobacteria;c_Gammaproteobacteria;o_Oceanospirillales;f_Halomonadaceae;g_Halomonas         | FEF <sub>25-75</sub>  | 0.39 (-1.57, 2.38)   | 7.0×10 <sup>-1</sup> |
| d_Bacteria;p_Proteobacteria;c_Gammaproteobacteria;o_Oceanospirillales;f_Halomonadaceae;g_Halomonas         | FEF <sub>25</sub>     | 1.39 (-0.48, 3.3)    | 1.5×10 <sup>-1</sup> |
| d_Bacteria;p_Proteobacteria;c_Gammaproteobacteria;o_Oceanospirillales;f_Halomonadaceae;g_Halomonas         | FEF <sub>50</sub>     | 0.23 (-1.84, 2.35)   | 8.3×10 <sup>-1</sup> |
| d_Bacteria;p_Proteobacteria;c_Gammaproteobacteria;o_Oceanospirillales;f_Halomonadaceae;g_Halomonas         | FEF <sub>75</sub>     | 0.17 (-2.31, 2.71)   | 9.0×10 <sup>-1</sup> |
| d_Bacteria;p_Proteobacteria;c_Gammaproteobacteria;o_Pseudomonadales;f_Moraxellaceae;g_Acinetobacter        | FVC                   | 0.8 (0.06, 1.55)     | 3.8×10 <sup>-2</sup> |
| d_Bacteria;p_Proteobacteria;c_Gammaproteobacteria;o_Pseudomonadales;f_Moraxellaceae;g_Acinetobacter        | FEV <sub>1</sub>      | 0.11 (-0.52, 0.74)   | 7.3×10 <sup>-1</sup> |
| d_Bacteria;p_Proteobacteria;c_Gammaproteobacteria;o_Pseudomonadales;f_Moraxellaceae;g_Acinetobacter        | FEV <sub>1</sub> /FVC | -0.55 (-1.11, 0.02)  | 6.2×10 <sup>-2</sup> |
| d_Bacteria;p_Proteobacteria;c_Gammaproteobacteria;o_Pseudomonadales;f_Moraxellaceae;g_Acinetobacter        | PEF                   | -0.04 (-1.69, 1.64)  | 9.6×10 <sup>-1</sup> |
| d_Bacteria;p_Proteobacteria;c_Gammaproteobacteria;o_Pseudomonadales;f_Moraxellaceae;g_Acinetobacter        | FEF <sub>25-75</sub>  | -1.81 (-3.5, -0.08)  | 4.3×10 <sup>-2</sup> |
| d_Bacteria;p_Proteobacteria;c_Gammaproteobacteria;o_Pseudomonadales;f_Moraxellaceae;g_Acinetobacter        | FEF <sub>25</sub>     | -0.42 (-2.1, 1.29)   | 6.3×10 <sup>-1</sup> |
| d_Bacteria;p_Proteobacteria;c_Gammaproteobacteria;o_Pseudomonadales;f_Moraxellaceae;g_Acinetobacter        | FEF <sub>50</sub>     | -2.04 (-3.82, -0.23) | 3.1×10 <sup>-2</sup> |
| d_Bacteria;p_Proteobacteria;c_Gammaproteobacteria;o_Pseudomonadales;f_Moraxellaceae;g_Acinetobacter        | FEF <sub>75</sub>     | -2.74 (-4.86, -0.58) | 1.5×10 <sup>-2</sup> |
| d_Bacteria;p_Proteobacteria;c_Gammaproteobacteria;o_Pseudomonadales;f_Moraxellaceae;g_Enhydrobacter        | FVC                   | -0.23 (-1, 0.54)     | 5.6×10 <sup>-1</sup> |
| d_Bacteria;p_Proteobacteria;c_Gammaproteobacteria;o_Pseudomonadales;f_Moraxellaceae;g_Enhydrobacter        | FEV <sub>1</sub>      | -0.26 (-0.89, 0.38)  | 4.4×10 <sup>-1</sup> |
| d_Bacteria;p_Proteobacteria;c_Gammaproteobacteria;o_Pseudomonadales;f_Moraxellaceae;g_Enhydrobacter        | FEV <sub>1</sub> /FVC | -0.15 (-0.74, 0.45)  | 6.3×10 <sup>-1</sup> |
| d_Bacteria;p_Proteobacteria;c_Gammaproteobacteria;o_Pseudomonadales;f_Moraxellaceae;g_Enhydrobacter        | PEF                   | -0.45 (-2.12, 1.25)  | 6.0×10 <sup>-1</sup> |
| d_Bacteria;p_Proteobacteria;c_Gammaproteobacteria;o_Pseudomonadales;f_Moraxellaceae;g_Enhydrobacter        | FEF <sub>25-75</sub>  | -1.03 (-2.79, 0.78)  | 2.7×10 <sup>-1</sup> |
| d_Bacteria;p_Proteobacteria;c_Gammaproteobacteria;o_Pseudomonadales;f_Moraxellaceae;g_Enhydrobacter        | FEF <sub>25</sub>     | -0.23 (-1.94, 1.52)  | 8.0×10 <sup>-1</sup> |
| d_Bacteria;p_Proteobacteria;c_Gammaproteobacteria;o_Pseudomonadales;f_Moraxellaceae;g_Enhydrobacter        | FEF <sub>50</sub>     | -1.39 (-3.25, 0.51)  | 1.5×10 <sup>-1</sup> |
| d_Bacteria;p_Proteobacteria;c_Gammaproteobacteria;o_Pseudomonadales;f_Moraxellaceae;g_Enhydrobacter        | FEF <sub>75</sub>     | -1.02 (-3.27, 1.29)  | 3.9×10 <sup>-1</sup> |
| d_Bacteria;p_Proteobacteria;c_Gammaproteobacteria;o_Pseudomonadales;f_Pseudomonadaceae;g_Pseudomonas       | FVC                   | -3.35 (-5.7, -0.94)  | 8.6×10 <sup>-3</sup> |
| d_Bacteria;p_Proteobacteria;c_Gammaproteobacteria;o_Pseudomonadales;f_Pseudomonadaceae;g_Pseudomonas       | FEV <sub>1</sub>      | -2.98 (-4.89, -1.03) | 4.1×10 <sup>-3</sup> |
| d_Bacteria;p_Proteobacteria;c_Gammaproteobacteria;o_Pseudomonadales;f_Pseudomonadaceae;g_Pseudomonas       | FEV <sub>1</sub> /FVC | 0.62 (-1.4, 2.7)     | 5.5×10 <sup>-1</sup> |
| d_Bacteria;p_Proteobacteria;c_Gammaproteobacteria;o_Pseudomonadales;f_Pseudomonadaceae;g_Pseudomonas       | PEF                   | -1.43 (-6.91, 4.36)  | 6.2×10 <sup>-1</sup> |
| d_Bacteria;p_Proteobacteria;c_Gammaproteobacteria;o_Pseudomonadales;f_Pseudomonadaceae;g_Pseudomonas       | FEF <sub>25-75</sub>  | -2.8 (-8.58, 3.35)   | 3.7×10 <sup>-1</sup> |
| d_Bacteria;p_Proteobacteria;c_Gammaproteobacteria;o_Pseudomonadales;f_Pseudomonadaceae;g_Pseudomonas       | FEF <sub>25</sub>     | -1.24 (-6.84, 4.71)  | 6.8×10 <sup>-1</sup> |
| d_Bacteria;p_Proteobacteria;c_Gammaproteobacteria;o_Pseudomonadales;f_Pseudomonadaceae;g_Pseudomonas       | FEF <sub>50</sub>     | -3.05 (-9.19, 3.5)   | 3.6×10 <sup>-1</sup> |
| d_Bacteria;p_Proteobacteria;c_Gammaproteobacteria;o_Pseudomonadales;f_Pseudomonadaceae;g_Pseudomonas       | FEF <sub>75</sub>     | -1.59 (-9.11, 6.55)  | 6.9×10 <sup>-1</sup> |
| d_Bacteria;p_Proteobacteria;c_Gammaproteobacteria;o_Vibrionales;f_Vibrionaceae;g_Vibrio                    | FVC                   | 0.16 (-0.82, 1.15)   | 7.5×10 <sup>-1</sup> |
| d_Bacteria;p_Proteobacteria;c_Gammaproteobacteria;o_Vibrionales;f_Vibrionaceae;g_Vibrio                    | FEV <sub>1</sub>      | 0 (-0.82, 0.83)      | 9.9×10 <sup>-1</sup> |
| d_Bacteria;p_Proteobacteria;c_Gammaproteobacteria;o_Vibrionales;f_Vibrionaceae;g_Vibrio                    | FEV <sub>1</sub> /FVC | -0.35 (-1.08, 0.39)  | 3.5×10 <sup>-1</sup> |
| d_Bacteria;p_Proteobacteria;c_Gammaproteobacteria;o_Vibrionales;f_Vibrionaceae;g_Vibrio                    | PEF                   | -1.3 (-3.38, 0.83)   | 2.3×10 <sup>-1</sup> |
| d_Bacteria;p_Proteobacteria;c_Gammaproteobacteria;o_Vibrionales;f_Vibrionaceae;g_Vibrio                    | FEF <sub>25-75</sub>  | -2 (-4.18, 0.24)     | 8.3×10 <sup>-2</sup> |
| d_Bacteria;p_Proteobacteria;c_Gammaproteobacteria;o_Vibrionales;f_Vibrionaceae;g_Vibrio                    | FEF <sub>25</sub>     | -1.07 (-3.22, 1.14)  | 3.4×10 <sup>-1</sup> |
| d_Bacteria;p_Proteobacteria;c_Gammaproteobacteria;o_Vibrionales;f_Vibrionaceae;g_Vibrio                    | FEF <sub>50</sub>     | -2.28 (-4.58, 0.07)  | 6.0×10 <sup>-2</sup> |
| d_Bacteria;p_Proteobacteria;c_Gammaproteobacteria;o_Vibrionales;f_Vibrionaceae;g_Vibrio                    | FEF <sub>75</sub>     | -2.07 (-4.84, 0.79)  | 1.6×10 <sup>-1</sup> |
| d_Bacteria;p_Proteobacteria;c_Gammaproteobacteria;o_Xanthomonadales;f_Xanthomonadaceae;g_Pseudoxanthomonas | FVC                   | 0.3 (-0.4, 1.01)     | 4.0×10 <sup>-1</sup> |
| d_Bacteria;p_Proteobacteria;c_Gammaproteobacteria;o_Xanthomonadales;f_Xanthomonadaceae;g_Pseudoxanthomonas | FEV <sub>1</sub>      | -0.25 (-0.83, 0.33)  | 4.0×10 <sup>-1</sup> |
| d_Bacteria;p_Proteobacteria;c_Gammaproteobacteria;o_Xanthomonadales;f_Xanthomonadaceae;g_Pseudoxanthomonas | FEV <sub>1</sub> /FVC | -0.35 (-0.88, 0.18)  | 1.9×10 <sup>-1</sup> |
| d_Bacteria;p_Proteobacteria;c_Gammaproteobacteria;o_Xanthomonadales;f_Xanthomonadaceae;g_Pseudoxanthomonas | PEF                   | -0.72 (-2.22, 0.79)  | 3.5×10 <sup>-1</sup> |
| d_Bacteria;p_Proteobacteria;c_Gammaproteobacteria;o_Xanthomonadales;f_Xanthomonadaceae;g_Pseudoxanthomonas | FEF <sub>25-75</sub>  | -0.96 (-2.56, 0.66)  | 2.5×10 <sup>-1</sup> |
| d_Bacteria;p_Proteobacteria;c_Gammaproteobacteria;o_Xanthomonadales;f_Xanthomonadaceae;g_Pseudoxanthomonas | FEF <sub>25</sub>     | -0.79 (-2.33, 0.77)  | 3.2×10 <sup>-1</sup> |
| d_Bacteria;p_Proteobacteria;c_Gammaproteobacteria;o_Xanthomonadales;f_Xanthomonadaceae;g_Pseudoxanthomonas | FEF <sub>50</sub>     | -0.62 (-2.32, 1.12)  | 4.9×10 <sup>-1</sup> |
| d_Bacteria;p_Proteobacteria;c_Gammaproteobacteria;o_Xanthomonadales;f_Xanthomonadaceae;g_Pseudoxanthomonas | FEF <sub>75</sub>     | -1.22 (-3.26, 0.85)  | 2.5×10 <sup>-1</sup> |
| d_Fungi;p_Ascmycota;c_Dothideomycetes;o_Capnodiales;f_Mycosphaerellaceae;g_Mycosphaerella                  | FVC                   | 0.76 (-0.17, 1.69)   | 1.2×10 <sup>-1</sup> |
| d_Fungi;p_Ascmycota;c_Dothideomycetes;o_Capnodiales;f_Mycosphaerellaceae;g_Mycosphaerella                  | FEV <sub>1</sub>      | 0.65 (-0.12, 1.42)   | 1.0×10 <sup>-1</sup> |
| d_Fungi;p_Ascmycota;c_Dothideomycetes;o_Capnodiales;f_Mycosphaerellaceae;g_Mycosphaerella                  | FEV <sub>1</sub> /FVC | -0.12 (-0.85, 0.61)  | 7.4×10 <sup>-1</sup> |
| d_Fungi;p_Ascmycota;c_Dothideomycetes;o_Capnodiales;f_Mycosphaerellaceae;g_Mycosphaerella                  | PEF                   | 0.44 (-1.61, 2.54)   | 6.8×10 <sup>-1</sup> |

|                                                                                            |                       |                     |                      |
|--------------------------------------------------------------------------------------------|-----------------------|---------------------|----------------------|
| d_Fungi;p_Ascomycota;c_Dothideomycetes;o_Capnodiales;f_Mycosphaerellaceae;g_Mycosphaerella | FEF <sub>25-75</sub>  | 1.51 (-0.7, 3.76)   | 1.9×10 <sup>-1</sup> |
| d_Fungi;p_Ascomycota;c_Dothideomycetes;o_Capnodiales;f_Mycosphaerellaceae;g_Mycosphaerella | FEF <sub>25</sub>     | 0.46 (-1.65, 2.61)  | 6.8×10 <sup>-1</sup> |
| d_Fungi;p_Ascomycota;c_Dothideomycetes;o_Capnodiales;f_Mycosphaerellaceae;g_Mycosphaerella | FEF <sub>50</sub>     | 2.09 (-0.24, 4.47)  | 8.3×10 <sup>-2</sup> |
| d_Fungi;p_Ascomycota;c_Dothideomycetes;o_Capnodiales;f_Mycosphaerellaceae;g_Mycosphaerella | FEF <sub>75</sub>     | 0.91 (-1.91, 3.82)  | 5.3×10 <sup>-1</sup> |
| d_Fungi;p_Ascomycota;c_Dothideomycetes;o_Pleosporales;f_Didymellaceae;g_Calophoma          | FVC                   | 0.41 (-0.5, 1.32)   | 3.8×10 <sup>-1</sup> |
| d_Fungi;p_Ascomycota;c_Dothideomycetes;o_Pleosporales;f_Didymellaceae;g_Calophoma          | FEV <sub>1</sub>      | 0.38 (-0.36, 1.13)  | 3.2×10 <sup>-1</sup> |
| d_Fungi;p_Ascomycota;c_Dothideomycetes;o_Pleosporales;f_Didymellaceae;g_Calophoma          | FEV <sub>1</sub> /FVC | -0.05 (-0.77, 0.67) | 8.9×10 <sup>-1</sup> |
| d_Fungi;p_Ascomycota;c_Dothideomycetes;o_Pleosporales;f_Didymellaceae;g_Calophoma          | PEF                   | 0.36 (-1.64, 2.41)  | 7.3×10 <sup>-1</sup> |
| d_Fungi;p_Ascomycota;c_Dothideomycetes;o_Pleosporales;f_Didymellaceae;g_Calophoma          | FEF <sub>25-75</sub>  | 1.6 (-0.57, 3.8)    | 1.5×10 <sup>-1</sup> |
| d_Fungi;p_Ascomycota;c_Dothideomycetes;o_Pleosporales;f_Didymellaceae;g_Calophoma          | FEF <sub>25</sub>     | 0.44 (-1.61, 2.53)  | 6.8×10 <sup>-1</sup> |
| d_Fungi;p_Ascomycota;c_Dothideomycetes;o_Pleosporales;f_Didymellaceae;g_Calophoma          | FEF <sub>50</sub>     | 1.9 (-0.39, 4.25)   | 1.1×10 <sup>-1</sup> |
| d_Fungi;p_Ascomycota;c_Dothideomycetes;o_Pleosporales;f_Didymellaceae;g_Calophoma          | FEF <sub>75</sub>     | 1.46 (-1.32, 4.33)  | 3.1×10 <sup>-1</sup> |
| d_Fungi;p_Ascomycota;c_Dothideomycetes;o_Pleosporales;f_Pleosporaceae;g_Alternaria         | FVC                   | 0.41 (-0.78, 1.62)  | 5.1×10 <sup>-1</sup> |
| d_Fungi;p_Ascomycota;c_Dothideomycetes;o_Pleosporales;f_Pleosporaceae;g_Alternaria         | FEV <sub>1</sub>      | 0.71 (-0.28, 1.7)   | 1.7×10 <sup>-1</sup> |
| d_Fungi;p_Ascomycota;c_Dothideomycetes;o_Pleosporales;f_Pleosporaceae;g_Alternaria         | FEV <sub>1</sub> /FVC | 0.13 (-0.78, 1.04)  | 7.9×10 <sup>-1</sup> |
| d_Fungi;p_Ascomycota;c_Dothideomycetes;o_Pleosporales;f_Pleosporaceae;g_Alternaria         | PEF                   | 0.12 (-2.46, 2.78)  | 9.3×10 <sup>-1</sup> |
| d_Fungi;p_Ascomycota;c_Dothideomycetes;o_Pleosporales;f_Pleosporaceae;g_Alternaria         | FEF <sub>25-75</sub>  | 0.75 (-2.02, 3.6)   | 6.0×10 <sup>-1</sup> |
| d_Fungi;p_Ascomycota;c_Dothideomycetes;o_Pleosporales;f_Pleosporaceae;g_Alternaria         | FEF <sub>25</sub>     | 0.03 (-2.63, 2.77)  | 9.8×10 <sup>-1</sup> |
| d_Fungi;p_Ascomycota;c_Dothideomycetes;o_Pleosporales;f_Pleosporaceae;g_Alternaria         | FEF <sub>50</sub>     | 0.59 (-2.35, 3.61)  | 7.0×10 <sup>-1</sup> |
| d_Fungi;p_Ascomycota;c_Dothideomycetes;o_Pleosporales;f_Pleosporaceae;g_Alternaria         | FEF <sub>75</sub>     | 1.26 (-2.26, 4.91)  | 4.9×10 <sup>-1</sup> |
| d_Fungi;p_Ascomycota;c_Eurotiomycetes;o_Eurotiales;f_Aspergillaceae;g_Aspergillus          | FVC                   | 0.26 (-0.67, 1.2)   | 5.9×10 <sup>-1</sup> |
| d_Fungi;p_Ascomycota;c_Eurotiomycetes;o_Eurotiales;f_Aspergillaceae;g_Aspergillus          | FEV <sub>1</sub>      | 0.38 (-0.4, 1.16)   | 3.5×10 <sup>-1</sup> |
| d_Fungi;p_Ascomycota;c_Eurotiomycetes;o_Eurotiales;f_Aspergillaceae;g_Aspergillus          | FEV <sub>1</sub> /FVC | 0.13 (-0.57, 0.84)  | 7.2×10 <sup>-1</sup> |
| d_Fungi;p_Ascomycota;c_Eurotiomycetes;o_Eurotiales;f_Aspergillaceae;g_Aspergillus          | PEF                   | 0.47 (-1.54, 2.53)  | 6.5×10 <sup>-1</sup> |
| d_Fungi;p_Ascomycota;c_Eurotiomycetes;o_Eurotiales;f_Aspergillaceae;g_Aspergillus          | FEF <sub>25-75</sub>  | 0.92 (-1.23, 3.13)  | 4.1×10 <sup>-1</sup> |
| d_Fungi;p_Ascomycota;c_Eurotiomycetes;o_Eurotiales;f_Aspergillaceae;g_Aspergillus          | FEF <sub>25</sub>     | 0.72 (-1.36, 2.84)  | 5.0×10 <sup>-1</sup> |
| d_Fungi;p_Ascomycota;c_Eurotiomycetes;o_Eurotiales;f_Aspergillaceae;g_Aspergillus          | FEF <sub>50</sub>     | 0.96 (-1.33, 3.3)   | 4.2×10 <sup>-1</sup> |
| d_Fungi;p_Ascomycota;c_Eurotiomycetes;o_Eurotiales;f_Aspergillaceae;g_Aspergillus          | FEF <sub>75</sub>     | 0.65 (-2.09, 3.46)  | 6.5×10 <sup>-1</sup> |
| d_Fungi;p_Ascomycota;c_Eurotiomycetes;o_Eurotiales;f_Aspergillaceae;g_Penicillium          | FVC                   | -0.11 (-0.95, 0.74) | 8.0×10 <sup>-1</sup> |
| d_Fungi;p_Ascomycota;c_Eurotiomycetes;o_Eurotiales;f_Aspergillaceae;g_Penicillium          | FEV <sub>1</sub>      | 0.3 (-0.4, 1.01)    | 4.0×10 <sup>-1</sup> |
| d_Fungi;p_Ascomycota;c_Eurotiomycetes;o_Eurotiales;f_Aspergillaceae;g_Penicillium          | FEV <sub>1</sub> /FVC | 0.4 (-0.24, 1.05)   | 2.3×10 <sup>-1</sup> |
| d_Fungi;p_Ascomycota;c_Eurotiomycetes;o_Eurotiales;f_Aspergillaceae;g_Penicillium          | PEF                   | 2.54 (0.75, 4.37)   | 6.7×10 <sup>-3</sup> |
| d_Fungi;p_Ascomycota;c_Eurotiomycetes;o_Eurotiales;f_Aspergillaceae;g_Penicillium          | FEF <sub>25-75</sub>  | 1.48 (-0.49, 3.5)   | 1.5×10 <sup>-1</sup> |
| d_Fungi;p_Ascomycota;c_Eurotiomycetes;o_Eurotiales;f_Aspergillaceae;g_Penicillium          | FEF <sub>25</sub>     | 1.75 (-0.13, 3.67)  | 7.2×10 <sup>-2</sup> |
| d_Fungi;p_Ascomycota;c_Eurotiomycetes;o_Eurotiales;f_Aspergillaceae;g_Penicillium          | FEF <sub>50</sub>     | 1.89 (-0.2, 4.03)   | 8.1×10 <sup>-2</sup> |
| d_Fungi;p_Ascomycota;c_Eurotiomycetes;o_Eurotiales;f_Aspergillaceae;g_Penicillium          | FEF <sub>75</sub>     | 0.93 (-1.61, 3.52)  | 4.8×10 <sup>-1</sup> |
| d_Fungi;p_Ascomycota;c_Eurotiomycetes;o_Eurotiales;f_Trichocomaceae;g_Talaromyces          | FVC                   | 0.45 (-0.51, 1.42)  | 3.6×10 <sup>-1</sup> |
| d_Fungi;p_Ascomycota;c_Eurotiomycetes;o_Eurotiales;f_Trichocomaceae;g_Talaromyces          | FEV <sub>1</sub>      | -0.12 (-0.93, 0.69) | 7.7×10 <sup>-1</sup> |
| d_Fungi;p_Ascomycota;c_Eurotiomycetes;o_Eurotiales;f_Trichocomaceae;g_Talaromyces          | FEV <sub>1</sub> /FVC | -0.44 (-1.17, 0.29) | 2.4×10 <sup>-1</sup> |
| d_Fungi;p_Ascomycota;c_Eurotiomycetes;o_Eurotiales;f_Trichocomaceae;g_Talaromyces          | PEF                   | 0.01 (-2.08, 2.15)  | 9.9×10 <sup>-1</sup> |
| d_Fungi;p_Ascomycota;c_Eurotiomycetes;o_Eurotiales;f_Trichocomaceae;g_Talaromyces          | FEF <sub>25-75</sub>  | -1.07 (-3.27, 1.18) | 3.5×10 <sup>-1</sup> |
| d_Fungi;p_Ascomycota;c_Eurotiomycetes;o_Eurotiales;f_Trichocomaceae;g_Talaromyces          | FEF <sub>25</sub>     | -0.44 (-2.58, 1.75) | 6.9×10 <sup>-1</sup> |
| d_Fungi;p_Ascomycota;c_Eurotiomycetes;o_Eurotiales;f_Trichocomaceae;g_Talaromyces          | FEF <sub>50</sub>     | -1.06 (-3.4, 1.34)  | 3.8×10 <sup>-1</sup> |
| d_Fungi;p_Ascomycota;c_Eurotiomycetes;o_Eurotiales;f_Trichocomaceae;g_Talaromyces          | FEF <sub>75</sub>     | -1.3 (-4.11, 1.59)  | 3.8×10 <sup>-1</sup> |
| d_Fungi;p_Ascomycota;c_Sordariomycetes;o_Hypocreales;f_Nectriaceae;g_Gibberella            | FVC                   | 0.4 (-0.68, 1.49)   | 4.7×10 <sup>-1</sup> |
| d_Fungi;p_Ascomycota;c_Sordariomycetes;o_Hypocreales;f_Nectriaceae;g_Gibberella            | FEV <sub>1</sub>      | 0.85 (-0.05, 1.76)  | 6.9×10 <sup>-2</sup> |
| d_Fungi;p_Ascomycota;c_Sordariomycetes;o_Hypocreales;f_Nectriaceae;g_Gibberella            | FEV <sub>1</sub> /FVC | 0.37 (-0.42, 1.17)  | 3.6×10 <sup>-1</sup> |
| d_Fungi;p_Ascomycota;c_Sordariomycetes;o_Hypocreales;f_Nectriaceae;g_Gibberella            | PEF                   | 2.43 (0.16, 4.76)   | 3.9×10 <sup>-2</sup> |

|                                                                                           |                       |                     |                      |
|-------------------------------------------------------------------------------------------|-----------------------|---------------------|----------------------|
| d_Fungi;p_Ascomycota;c_Sordariomycetes;o_Hypocreales;f_Nectriaceae;g_Gibberella           | FEF <sub>25-75</sub>  | 1.39 (-1.08, 3.92)  | 2.8×10 <sup>-1</sup> |
| d_Fungi;p_Ascomycota;c_Sordariomycetes;o_Hypocreales;f_Nectriaceae;g_Gibberella           | FEF <sub>25</sub>     | 2.87 (0.52, 5.28)   | 1.9×10 <sup>-2</sup> |
| d_Fungi;p_Ascomycota;c_Sordariomycetes;o_Hypocreales;f_Nectriaceae;g_Gibberella           | FEF <sub>50</sub>     | 1.1 (-1.5, 3.76)    | 4.1×10 <sup>-1</sup> |
| d_Fungi;p_Ascomycota;c_Sordariomycetes;o_Hypocreales;f_Nectriaceae;g_Gibberella           | FEF <sub>75</sub>     | 1.12 (-1.98, 4.32)  | 4.8×10 <sup>-1</sup> |
| d_Fungi;p_Basidiomycota;c_Agaricomycetes;o_Atheliales;f_Atheliaceae;g_Tylospora           | FVC                   | -1.24 (-2.5, 0.05)  | 6.3×10 <sup>-2</sup> |
| d_Fungi;p_Basidiomycota;c_Agaricomycetes;o_Atheliales;f_Atheliaceae;g_Tylospora           | FEV <sub>1</sub>      | -0.71 (-1.78, 0.38) | 2.0×10 <sup>-1</sup> |
| d_Fungi;p_Basidiomycota;c_Agaricomycetes;o_Atheliales;f_Atheliaceae;g_Tylospora           | FEV <sub>1</sub> /FVC | 0.39 (-0.59, 1.38)  | 4.4×10 <sup>-1</sup> |
| d_Fungi;p_Basidiomycota;c_Agaricomycetes;o_Atheliales;f_Atheliaceae;g_Tylospora           | PEF                   | -0.98 (-3.75, 1.86) | 4.9×10 <sup>-1</sup> |
| d_Fungi;p_Basidiomycota;c_Agaricomycetes;o_Atheliales;f_Atheliaceae;g_Tylospora           | FEF <sub>25-75</sub>  | -0.14 (-3.12, 2.93) | 9.3×10 <sup>-1</sup> |
| d_Fungi;p_Basidiomycota;c_Agaricomycetes;o_Atheliales;f_Atheliaceae;g_Tylospora           | FEF <sub>25</sub>     | -1.24 (-4.08, 1.68) | 4.0×10 <sup>-1</sup> |
| d_Fungi;p_Basidiomycota;c_Agaricomycetes;o_Atheliales;f_Atheliaceae;g_Tylospora           | FEF <sub>50</sub>     | -0.61 (-3.75, 2.63) | 7.1×10 <sup>-1</sup> |
| d_Fungi;p_Basidiomycota;c_Agaricomycetes;o_Atheliales;f_Atheliaceae;g_Tylospora           | FEF <sub>75</sub>     | 1.36 (-2.45, 5.33)  | 4.9×10 <sup>-1</sup> |
| d_Fungi;p_Basidiomycota;c_Malasseziomycetes;o_Malasseziales;f_Malasseziaceae;g_Malassezia | FVC                   | -0.15 (-1.14, 0.85) | 7.7×10 <sup>-1</sup> |
| d_Fungi;p_Basidiomycota;c_Malasseziomycetes;o_Malasseziales;f_Malasseziaceae;g_Malassezia | FEV <sub>1</sub>      | 0.63 (-0.18, 1.44)  | 1.3×10 <sup>-1</sup> |
| d_Fungi;p_Basidiomycota;c_Malasseziomycetes;o_Malasseziales;f_Malasseziaceae;g_Malassezia | FEV <sub>1</sub> /FVC | 0.82 (0.06, 1.59)   | 3.8×10 <sup>-2</sup> |
| d_Fungi;p_Basidiomycota;c_Malasseziomycetes;o_Malasseziales;f_Malasseziaceae;g_Malassezia | PEF                   | -0.45 (-2.6, 1.75)  | 6.9×10 <sup>-1</sup> |
| d_Fungi;p_Basidiomycota;c_Malasseziomycetes;o_Malasseziales;f_Malasseziaceae;g_Malassezia | FEF <sub>25-75</sub>  | 1.36 (-1, 3.78)     | 2.6×10 <sup>-1</sup> |
| d_Fungi;p_Basidiomycota;c_Malasseziomycetes;o_Malasseziales;f_Malasseziaceae;g_Malassezia | FEF <sub>25</sub>     | -0.14 (-2.35, 2.13) | 9.1×10 <sup>-1</sup> |
| d_Fungi;p_Basidiomycota;c_Malasseziomycetes;o_Malasseziales;f_Malasseziaceae;g_Malassezia | FEF <sub>50</sub>     | 1.58 (-0.93, 4.15)  | 2.2×10 <sup>-1</sup> |
| d_Fungi;p_Basidiomycota;c_Malasseziomycetes;o_Malasseziales;f_Malasseziaceae;g_Malassezia | FEF <sub>75</sub>     | 2.18 (-0.84, 5.3)   | 1.6×10 <sup>-1</sup> |
| d_Fungi;p_Basidiomycota;c_Wallemiomycetes;o_Wallemiales;f_Wallemiaceae;g_Wallemia         | FVC                   | 1.37 (-0.19, 2.96)  | 9.0×10 <sup>-2</sup> |
| d_Fungi;p_Basidiomycota;c_Wallemiomycetes;o_Wallemiales;f_Wallemiaceae;g_Wallemia         | FEV <sub>1</sub>      | 0.99 (-0.35, 2.35)  | 1.5×10 <sup>-1</sup> |
| d_Fungi;p_Basidiomycota;c_Wallemiomycetes;o_Wallemiales;f_Wallemiaceae;g_Wallemia         | FEV <sub>1</sub> /FVC | -0.43 (-1.57, 0.73) | 4.7×10 <sup>-1</sup> |
| d_Fungi;p_Basidiomycota;c_Wallemiomycetes;o_Wallemiales;f_Wallemiaceae;g_Wallemia         | PEF                   | -0.99 (-4.29, 2.42) | 5.7×10 <sup>-1</sup> |
| d_Fungi;p_Basidiomycota;c_Wallemiomycetes;o_Wallemiales;f_Wallemiaceae;g_Wallemia         | FEF <sub>25-75</sub>  | -1.54 (-5.02, 2.06) | 4.0×10 <sup>-1</sup> |
| d_Fungi;p_Basidiomycota;c_Wallemiomycetes;o_Wallemiales;f_Wallemiaceae;g_Wallemia         | FEF <sub>25</sub>     | -1.49 (-4.89, 2.04) | 4.1×10 <sup>-1</sup> |
| d_Fungi;p_Basidiomycota;c_Wallemiomycetes;o_Wallemiales;f_Wallemiaceae;g_Wallemia         | FEF <sub>50</sub>     | -2.05 (-5.69, 1.73) | 2.9×10 <sup>-1</sup> |
| d_Fungi;p_Basidiomycota;c_Wallemiomycetes;o_Wallemiales;f_Wallemiaceae;g_Wallemia         | FEF <sub>75</sub>     | -1.58 (-5.94, 2.97) | 4.9×10 <sup>-1</sup> |

Note: The regressions were only conducted for the high-abundant taxonomic genera present in at least 10 dormitory air samples with an average relative abundance > 0.3%. In total, 41 bacterial genera and 10 fungal genera were identified and analyzed. Percentage changes and 95% confidence intervals were calculated for per unit increase in the transformed absolute abundance ( $\log_{10}(\text{absolute abundance} * 10^5 + 1)$ ). Linear mixed-effect models were adjusted for age, gender, BMI, season, PM<sub>2.5</sub>, purification status (real or sham), temperature, relative humidity, and a random intercept for each participant. FVC, forced vital capacity; FEV<sub>1</sub>, forced expiratory volume in one second; PEF, peak expiratory flow; FEF<sub>25</sub>, forced expiratory flow at 25% of FVC; FEF<sub>50</sub>, forced expiratory flow at 50% of FVC; FEF<sub>75</sub>, forced expiratory flow at 75% of FVC; FEF<sub>25-75</sub>, forced expiratory flow from 25-75% of FVC; CIs, confidence intervals.

**Table S5.** All results of associations between indoor airborne microbial relative abundance and lung function measures.

| Taxon                                                                                                   | Lung function measures | Percentage changes (95% CIs) | p-Value               |
|---------------------------------------------------------------------------------------------------------|------------------------|------------------------------|-----------------------|
| d_Bacteria;p_Actinobacteria;c_Actinobacteria;o_Actinomycetales;f_Actinomycetaceae;g_Actinomyces         | FVC                    | 0.17 (-1.52, 1.88)           | 8.46×10 <sup>-1</sup> |
| d_Bacteria;p_Actinobacteria;c_Actinobacteria;o_Actinomycetales;f_Actinomycetaceae;g_Actinomyces         | FEV <sub>1</sub>       | 1.57 (0.2, 2.95)             | 2.81×10 <sup>-2</sup> |
| d_Bacteria;p_Actinobacteria;c_Actinobacteria;o_Actinomycetales;f_Actinomycetaceae;g_Actinomyces         | FEV <sub>1</sub> /FVC  | 0.91 (-0.37, 2.21)           | 1.67×10 <sup>-1</sup> |
| d_Bacteria;p_Actinobacteria;c_Actinobacteria;o_Actinomycetales;f_Actinomycetaceae;g_Actinomyces         | PEF                    | 5.41 (1.8, 9.15)             | 4.04×10 <sup>-3</sup> |
| d_Bacteria;p_Actinobacteria;c_Actinobacteria;o_Actinomycetales;f_Actinomycetaceae;g_Actinomyces         | FEF <sub>25-75</sub>   | 5.21 (1.34, 9.23)            | 9.61×10 <sup>-3</sup> |
| d_Bacteria;p_Actinobacteria;c_Actinobacteria;o_Actinomycetales;f_Actinomycetaceae;g_Actinomyces         | FEF <sub>25</sub>      | 5.03 (1.3, 8.9)              | 9.52×10 <sup>-3</sup> |
| d_Bacteria;p_Actinobacteria;c_Actinobacteria;o_Actinomycetales;f_Actinomycetaceae;g_Actinomyces         | FEF <sub>50</sub>      | 5.48 (1.35, 9.78)            | 1.06×10 <sup>-2</sup> |
| d_Bacteria;p_Actinobacteria;c_Actinobacteria;o_Actinomycetales;f_Actinomycetaceae;g_Actinomyces         | FEF <sub>75</sub>      | 4.84 (-0.18, 10.11)          | 6.24×10 <sup>-2</sup> |
| d_Bacteria;p_Actinobacteria;c_Actinobacteria;o_Corynebacteriales;f_Corynebacteriaceae;g_Corynebacterium | FVC                    | 0.67 (-1.02, 2.4)            | 4.40×10 <sup>-1</sup> |
| d_Bacteria;p_Actinobacteria;c_Actinobacteria;o_Corynebacteriales;f_Corynebacteriaceae;g_Corynebacterium | FEV <sub>1</sub>       | 0.93 (-0.5, 2.38)            | 2.06×10 <sup>-1</sup> |
| d_Bacteria;p_Actinobacteria;c_Actinobacteria;o_Corynebacteriales;f_Corynebacteriaceae;g_Corynebacterium | FEV <sub>1</sub> /FVC  | -0.2 (-1.43, 1.04)           | 7.49×10 <sup>-1</sup> |
| d_Bacteria;p_Actinobacteria;c_Actinobacteria;o_Corynebacteriales;f_Corynebacteriaceae;g_Corynebacterium | PEF                    | -0.76 (-4.33, 2.95)          | 6.85×10 <sup>-1</sup> |
| d_Bacteria;p_Actinobacteria;c_Actinobacteria;o_Corynebacteriales;f_Corynebacteriaceae;g_Corynebacterium | FEF <sub>25-75</sub>   | -1.01 (-4.78, 2.91)          | 6.10×10 <sup>-1</sup> |
| d_Bacteria;p_Actinobacteria;c_Actinobacteria;o_Corynebacteriales;f_Corynebacteriaceae;g_Corynebacterium | FEF <sub>25</sub>      | -0.47 (-4.19, 3.4)           | 8.10×10 <sup>-1</sup> |
| d_Bacteria;p_Actinobacteria;c_Actinobacteria;o_Corynebacteriales;f_Corynebacteriaceae;g_Corynebacterium | FEF <sub>50</sub>      | -1.33 (-5.29, 2.79)          | 5.21×10 <sup>-1</sup> |
| d_Bacteria;p_Actinobacteria;c_Actinobacteria;o_Corynebacteriales;f_Corynebacteriaceae;g_Corynebacterium | FEF <sub>75</sub>      | -0.52 (-5.24, 4.43)          | 8.33×10 <sup>-1</sup> |
| d_Bacteria;p_Actinobacteria;c_Actinobacteria;o_Frankiales;f_Geodermatophilaceae;g_Geodermatophilus      | FVC                    | 0.19 (-1.51, 1.92)           | 8.28×10 <sup>-1</sup> |
| d_Bacteria;p_Actinobacteria;c_Actinobacteria;o_Frankiales;f_Geodermatophilaceae;g_Geodermatophilus      | FEV <sub>1</sub>       | 0.91 (-0.5, 2.34)            | 2.10×10 <sup>-1</sup> |
| d_Bacteria;p_Actinobacteria;c_Actinobacteria;o_Frankiales;f_Geodermatophilaceae;g_Geodermatophilus      | FEV <sub>1</sub> /FVC  | 0.35 (-0.94, 1.66)           | 5.94×10 <sup>-1</sup> |
| d_Bacteria;p_Actinobacteria;c_Actinobacteria;o_Frankiales;f_Geodermatophilaceae;g_Geodermatophilus      | PEF                    | -1.45 (-5.06, 2.29)          | 4.43×10 <sup>-1</sup> |
| d_Bacteria;p_Actinobacteria;c_Actinobacteria;o_Frankiales;f_Geodermatophilaceae;g_Geodermatophilus      | FEF <sub>25-75</sub>   | 1.95 (-2.01, 6.06)           | 3.42×10 <sup>-1</sup> |
| d_Bacteria;p_Actinobacteria;c_Actinobacteria;o_Frankiales;f_Geodermatophilaceae;g_Geodermatophilus      | FEF <sub>25</sub>      | -1.08 (-4.8, 2.8)            | 5.82×10 <sup>-1</sup> |
| d_Bacteria;p_Actinobacteria;c_Actinobacteria;o_Frankiales;f_Geodermatophilaceae;g_Geodermatophilus      | FEF <sub>50</sub>      | 2.59 (-1.6, 6.95)            | 2.33×10 <sup>-1</sup> |
| d_Bacteria;p_Actinobacteria;c_Actinobacteria;o_Frankiales;f_Geodermatophilaceae;g_Geodermatophilus      | FEF <sub>75</sub>      | 3.79 (-1.29, 9.12)           | 1.50×10 <sup>-1</sup> |
| d_Bacteria;p_Actinobacteria;c_Actinobacteria;o_Micrococcales;f_Micrococcaceae;g_Kocuria                 | FVC                    | 0.04 (-1.15, 1.24)           | 9.48×10 <sup>-1</sup> |
| d_Bacteria;p_Actinobacteria;c_Actinobacteria;o_Micrococcales;f_Micrococcaceae;g_Kocuria                 | FEV <sub>1</sub>       | 1.34 (0.41, 2.28)            | 6.26×10 <sup>-3</sup> |
| d_Bacteria;p_Actinobacteria;c_Actinobacteria;o_Micrococcales;f_Micrococcaceae;g_Kocuria                 | FEV <sub>1</sub> /FVC  | 0.73 (-0.16, 1.62)           | 1.12×10 <sup>-1</sup> |
| d_Bacteria;p_Actinobacteria;c_Actinobacteria;o_Micrococcales;f_Micrococcaceae;g_Kocuria                 | PEF                    | 3.3 (0.81, 5.85)             | 1.09×10 <sup>-2</sup> |
| d_Bacteria;p_Actinobacteria;c_Actinobacteria;o_Micrococcales;f_Micrococcaceae;g_Kocuria                 | FEF <sub>25-75</sub>   | 2.59 (-0.13, 5.37)           | 6.57×10 <sup>-2</sup> |
| d_Bacteria;p_Actinobacteria;c_Actinobacteria;o_Micrococcales;f_Micrococcaceae;g_Kocuria                 | FEF <sub>25</sub>      | 3.32 (0.75, 5.94)            | 1.30×10 <sup>-2</sup> |
| d_Bacteria;p_Actinobacteria;c_Actinobacteria;o_Micrococcales;f_Micrococcaceae;g_Kocuria                 | FEF <sub>50</sub>      | 2.47 (-0.42, 5.45)           | 9.81×10 <sup>-2</sup> |
| d_Bacteria;p_Actinobacteria;c_Actinobacteria;o_Micrococcales;f_Micrococcaceae;g_Kocuria                 | FEF <sub>75</sub>      | 2.43 (-1.08, 6.05)           | 1.80×10 <sup>-1</sup> |
| d_Bacteria;p_Actinobacteria;c_Actinobacteria;o_Micrococcales;f_Micrococcaceae;g_Micrococcus             | FVC                    | 0.94 (-0.39, 2.3)            | 1.72×10 <sup>-1</sup> |
| d_Bacteria;p_Actinobacteria;c_Actinobacteria;o_Micrococcales;f_Micrococcaceae;g_Micrococcus             | FEV <sub>1</sub>       | 0.76 (-0.38, 1.91)           | 1.95×10 <sup>-1</sup> |
| d_Bacteria;p_Actinobacteria;c_Actinobacteria;o_Micrococcales;f_Micrococcaceae;g_Micrococcus             | FEV <sub>1</sub> /FVC  | -0.36 (-1.36, 0.65)          | 4.84×10 <sup>-1</sup> |
| d_Bacteria;p_Actinobacteria;c_Actinobacteria;o_Micrococcales;f_Micrococcaceae;g_Micrococcus             | PEF                    | -0.5 (-3.39, 2.47)           | 7.38×10 <sup>-1</sup> |
| d_Bacteria;p_Actinobacteria;c_Actinobacteria;o_Micrococcales;f_Micrococcaceae;g_Micrococcus             | FEF <sub>25-75</sub>   | 0.17 (-2.92, 3.36)           | 9.14×10 <sup>-1</sup> |
| d_Bacteria;p_Actinobacteria;c_Actinobacteria;o_Micrococcales;f_Micrococcaceae;g_Micrococcus             | FEF <sub>25</sub>      | -0.13 (-3.12, 2.96)          | 9.35×10 <sup>-1</sup> |
| d_Bacteria;p_Actinobacteria;c_Actinobacteria;o_Micrococcales;f_Micrococcaceae;g_Micrococcus             | FEF <sub>50</sub>      | -0.28 (-3.54, 3.08)          | 8.68×10 <sup>-1</sup> |
| d_Bacteria;p_Actinobacteria;c_Actinobacteria;o_Micrococcales;f_Micrococcaceae;g_Micrococcus             | FEF <sub>75</sub>      | 0.71 (-3.2, 4.79)            | 7.26×10 <sup>-1</sup> |
| d_Bacteria;p_Actinobacteria;c_Actinobacteria;o_Propionibacteriales;f_Nocardioidaceae;g_Nocardioides     | FVC                    | -0.31 (-1.6, 0.99)           | 6.37×10 <sup>-1</sup> |
| d_Bacteria;p_Actinobacteria;c_Actinobacteria;o_Propionibacteriales;f_Nocardioidaceae;g_Nocardioides     | FEV <sub>1</sub>       | 0.85 (-0.21, 1.92)           | 1.21×10 <sup>-1</sup> |
| d_Bacteria;p_Actinobacteria;c_Actinobacteria;o_Propionibacteriales;f_Nocardioidaceae;g_Nocardioides     | FEV <sub>1</sub> /FVC  | 0.98 (-0.01, 1.98)           | 5.55×10 <sup>-2</sup> |
| d_Bacteria;p_Actinobacteria;c_Actinobacteria;o_Propionibacteriales;f_Nocardioidaceae;g_Nocardioides     | PEF                    | 1.44 (-1.39, 4.35)           | 3.25×10 <sup>-1</sup> |

|                                                                                                     |                       |                     |                       |
|-----------------------------------------------------------------------------------------------------|-----------------------|---------------------|-----------------------|
| d_Bacteria;p_Actinobacteria;c_Actinobacteria;o_Propionibacteriales;f_Nocardioideaceae;g_Nocardioide | FEF <sub>25-75</sub>  | 2.44 (-0.61, 5.59)  | 1.22×10 <sup>-1</sup> |
| d_Bacteria;p_Actinobacteria;c_Actinobacteria;o_Propionibacteriales;f_Nocardioideaceae;g_Nocardioide | FEF <sub>25</sub>     | 1.27 (-1.63, 4.26)  | 3.98×10 <sup>-1</sup> |
| d_Bacteria;p_Actinobacteria;c_Actinobacteria;o_Propionibacteriales;f_Nocardioideaceae;g_Nocardioide | FEF <sub>50</sub>     | 2.64 (-0.61, 5.99)  | 1.16×10 <sup>-1</sup> |
| d_Bacteria;p_Actinobacteria;c_Actinobacteria;o_Propionibacteriales;f_Nocardioideaceae;g_Nocardioide | FEF <sub>75</sub>     | 3.25 (-0.69, 7.36)  | 1.11×10 <sup>-1</sup> |
| d_Bacteria;p_Bacteroidetes;c_Bacteroidia;o_Flavobacteriales;f_Weeksellaceae;g_Cloacibacterium       | FVC                   | 0.88 (-0.36, 2.14)  | 1.67×10 <sup>-1</sup> |
| d_Bacteria;p_Bacteroidetes;c_Bacteroidia;o_Flavobacteriales;f_Weeksellaceae;g_Cloacibacterium       | FEV <sub>1</sub>      | -0.47 (-1.5, 0.57)  | 3.77×10 <sup>-1</sup> |
| d_Bacteria;p_Bacteroidetes;c_Bacteroidia;o_Flavobacteriales;f_Weeksellaceae;g_Cloacibacterium       | FEV <sub>1</sub> /FVC | -0.88 (-1.75, 0)    | 5.38×10 <sup>-2</sup> |
| d_Bacteria;p_Bacteroidetes;c_Bacteroidia;o_Flavobacteriales;f_Weeksellaceae;g_Cloacibacterium       | PEF                   | -0.39 (-3, 2.29)    | 7.74×10 <sup>-1</sup> |
| d_Bacteria;p_Bacteroidetes;c_Bacteroidia;o_Flavobacteriales;f_Weeksellaceae;g_Cloacibacterium       | FEF <sub>25-75</sub>  | -1.72 (-4.43, 1.07) | 2.27×10 <sup>-1</sup> |
| d_Bacteria;p_Bacteroidetes;c_Bacteroidia;o_Flavobacteriales;f_Weeksellaceae;g_Cloacibacterium       | FEF <sub>25</sub>     | -1.04 (-3.72, 1.71) | 4.55×10 <sup>-1</sup> |
| d_Bacteria;p_Bacteroidetes;c_Bacteroidia;o_Flavobacteriales;f_Weeksellaceae;g_Cloacibacterium       | FEF <sub>50</sub>     | -1.89 (-4.74, 1.05) | 2.08×10 <sup>-1</sup> |
| d_Bacteria;p_Bacteroidetes;c_Bacteroidia;o_Flavobacteriales;f_Weeksellaceae;g_Cloacibacterium       | FEF <sub>75</sub>     | -2.84 (-6.19, 0.63) | 1.10×10 <sup>-1</sup> |
| d_Bacteria;p_Cyanobacteria;c_Oxyphotobacteria;o_Chloroplast;f_Chloroplast;g_Chloroplast             | FVC                   | -0.42 (-1.59, 0.76) | 4.87×10 <sup>-1</sup> |
| d_Bacteria;p_Cyanobacteria;c_Oxyphotobacteria;o_Chloroplast;f_Chloroplast;g_Chloroplast             | FEV <sub>1</sub>      | 0.86 (-0.1, 1.82)   | 8.41×10 <sup>-2</sup> |
| d_Bacteria;p_Cyanobacteria;c_Oxyphotobacteria;o_Chloroplast;f_Chloroplast;g_Chloroplast             | FEV <sub>1</sub> /FVC | 0.9 (0.02, 1.79)    | 4.80×10 <sup>-2</sup> |
| d_Bacteria;p_Cyanobacteria;c_Oxyphotobacteria;o_Chloroplast;f_Chloroplast;g_Chloroplast             | PEF                   | 0.25 (-2.31, 2.87)  | 8.51×10 <sup>-1</sup> |
| d_Bacteria;p_Cyanobacteria;c_Oxyphotobacteria;o_Chloroplast;f_Chloroplast;g_Chloroplast             | FEF <sub>25-75</sub>  | 1.5 (-1.25, 4.32)   | 2.92×10 <sup>-1</sup> |
| d_Bacteria;p_Cyanobacteria;c_Oxyphotobacteria;o_Chloroplast;f_Chloroplast;g_Chloroplast             | FEF <sub>25</sub>     | 1.08 (-1.54, 3.78)  | 4.26×10 <sup>-1</sup> |
| d_Bacteria;p_Cyanobacteria;c_Oxyphotobacteria;o_Chloroplast;f_Chloroplast;g_Chloroplast             | FEF <sub>50</sub>     | 1.58 (-1.34, 4.58)  | 2.96×10 <sup>-1</sup> |
| d_Bacteria;p_Cyanobacteria;c_Oxyphotobacteria;o_Chloroplast;f_Chloroplast;g_Chloroplast             | FEF <sub>75</sub>     | 2.6 (-0.92, 6.26)   | 1.53×10 <sup>-1</sup> |
| d_Bacteria;p_Deinococcus-Thermus;c_Deinococci;o_Deinococcales;f_Deinococcaceae;g_Deinococcus        | FVC                   | 0.5 (-0.67, 1.68)   | 4.06×10 <sup>-1</sup> |
| d_Bacteria;p_Deinococcus-Thermus;c_Deinococci;o_Deinococcales;f_Deinococcaceae;g_Deinococcus        | FEV <sub>1</sub>      | 0.66 (-0.29, 1.63)  | 1.80×10 <sup>-1</sup> |
| d_Bacteria;p_Deinococcus-Thermus;c_Deinococci;o_Deinococcales;f_Deinococcaceae;g_Deinococcus        | FEV <sub>1</sub> /FVC | 0.05 (-0.86, 0.97)  | 9.10×10 <sup>-1</sup> |
| d_Bacteria;p_Deinococcus-Thermus;c_Deinococci;o_Deinococcales;f_Deinococcaceae;g_Deinococcus        | PEF                   | 1.65 (-0.92, 4.27)  | 2.14×10 <sup>-1</sup> |
| d_Bacteria;p_Deinococcus-Thermus;c_Deinococci;o_Deinococcales;f_Deinococcaceae;g_Deinococcus        | FEF <sub>25-75</sub>  | 0.47 (-2.3, 3.31)   | 7.45×10 <sup>-1</sup> |
| d_Bacteria;p_Deinococcus-Thermus;c_Deinococci;o_Deinococcales;f_Deinococcaceae;g_Deinococcus        | FEF <sub>25</sub>     | 2 (-0.61, 4.69)     | 1.39×10 <sup>-1</sup> |
| d_Bacteria;p_Deinococcus-Thermus;c_Deinococci;o_Deinococcales;f_Deinococcaceae;g_Deinococcus        | FEF <sub>50</sub>     | 0 (-2.93, 3.01)     | 1.00×10 <sup>0</sup>  |
| d_Bacteria;p_Deinococcus-Thermus;c_Deinococci;o_Deinococcales;f_Deinococcaceae;g_Deinococcus        | FEF <sub>75</sub>     | 0.66 (-2.88, 4.33)  | 7.20×10 <sup>-1</sup> |
| d_Bacteria;p_Firmicutes;c_Bacilli;o_Bacillales;f_Staphylococcaceae;g_Abyssicoccus                   | FVC                   | -0.34 (-1.86, 1.21) | 6.70×10 <sup>-1</sup> |
| d_Bacteria;p_Firmicutes;c_Bacilli;o_Bacillales;f_Staphylococcaceae;g_Abyssicoccus                   | FEV <sub>1</sub>      | 0.74 (-0.52, 2.02)  | 2.53×10 <sup>-1</sup> |
| d_Bacteria;p_Firmicutes;c_Bacilli;o_Bacillales;f_Staphylococcaceae;g_Abyssicoccus                   | FEV <sub>1</sub> /FVC | 0.69 (-0.5, 1.9)    | 2.60×10 <sup>-1</sup> |
| d_Bacteria;p_Firmicutes;c_Bacilli;o_Bacillales;f_Staphylococcaceae;g_Abyssicoccus                   | PEF                   | 1.82 (-1.54, 5.29)  | 2.96×10 <sup>-1</sup> |
| d_Bacteria;p_Firmicutes;c_Bacilli;o_Bacillales;f_Staphylococcaceae;g_Abyssicoccus                   | FEF <sub>25-75</sub>  | 2.13 (-1.49, 5.87)  | 2.56×10 <sup>-1</sup> |
| d_Bacteria;p_Firmicutes;c_Bacilli;o_Bacillales;f_Staphylococcaceae;g_Abyssicoccus                   | FEF <sub>25</sub>     | 1.74 (-1.69, 5.3)   | 3.28×10 <sup>-1</sup> |
| d_Bacteria;p_Firmicutes;c_Bacilli;o_Bacillales;f_Staphylococcaceae;g_Abyssicoccus                   | FEF <sub>50</sub>     | 1.28 (-2.57, 5.28)  | 5.23×10 <sup>-1</sup> |
| d_Bacteria;p_Firmicutes;c_Bacilli;o_Bacillales;f_Staphylococcaceae;g_Abyssicoccus                   | FEF <sub>75</sub>     | 2.35 (-2.32, 7.24)  | 3.33×10 <sup>-1</sup> |
| d_Bacteria;p_Firmicutes;c_Bacilli;o_Bacillales;f_Staphylococcaceae;g_Staphylococcus                 | FVC                   | -0.18 (-1.55, 1.21) | 8.03×10 <sup>-1</sup> |
| d_Bacteria;p_Firmicutes;c_Bacilli;o_Bacillales;f_Staphylococcaceae;g_Staphylococcus                 | FEV <sub>1</sub>      | 0.89 (-0.23, 2.02)  | 1.25×10 <sup>-1</sup> |
| d_Bacteria;p_Firmicutes;c_Bacilli;o_Bacillales;f_Staphylococcaceae;g_Staphylococcus                 | FEV <sub>1</sub> /FVC | 0.54 (-0.51, 1.6)   | 3.16×10 <sup>-1</sup> |
| d_Bacteria;p_Firmicutes;c_Bacilli;o_Bacillales;f_Staphylococcaceae;g_Staphylococcus                 | PEF                   | 4.7 (1.87, 7.6)     | 1.55×10 <sup>-3</sup> |
| d_Bacteria;p_Firmicutes;c_Bacilli;o_Bacillales;f_Staphylococcaceae;g_Staphylococcus                 | FEF <sub>25-75</sub>  | 1.82 (-1.39, 5.12)  | 2.73×10 <sup>-1</sup> |
| d_Bacteria;p_Firmicutes;c_Bacilli;o_Bacillales;f_Staphylococcaceae;g_Staphylococcus                 | FEF <sub>25</sub>     | 4.35 (1.42, 7.37)   | 4.62×10 <sup>-3</sup> |
| d_Bacteria;p_Firmicutes;c_Bacilli;o_Bacillales;f_Staphylococcaceae;g_Staphylococcus                 | FEF <sub>50</sub>     | 1.17 (-2.23, 4.69)  | 5.05×10 <sup>-1</sup> |
| d_Bacteria;p_Firmicutes;c_Bacilli;o_Bacillales;f_Staphylococcaceae;g_Staphylococcus                 | FEF <sub>75</sub>     | 1.45 (-2.65, 5.72)  | 4.95×10 <sup>-1</sup> |
| d_Bacteria;p_Firmicutes;c_Bacilli;o_Lactobacillales;f_Lactobacillaceae;g_Lactobacillus              | FVC                   | -0.05 (-1.24, 1.15) | 9.32×10 <sup>-1</sup> |
| d_Bacteria;p_Firmicutes;c_Bacilli;o_Lactobacillales;f_Lactobacillaceae;g_Lactobacillus              | FEV <sub>1</sub>      | -0.17 (-1.15, 0.83) | 7.39×10 <sup>-1</sup> |
| d_Bacteria;p_Firmicutes;c_Bacilli;o_Lactobacillales;f_Lactobacillaceae;g_Lactobacillus              | FEV <sub>1</sub> /FVC | -0.06 (-0.99, 0.87) | 8.93×10 <sup>-1</sup> |

|                                                                                                          |                       |                      |                       |
|----------------------------------------------------------------------------------------------------------|-----------------------|----------------------|-----------------------|
| d_Bacteria;p_Firmicutes;c_Bacilli;o_Lactobacillales;f_Lactobacillaceae;g_Lactobacillus                   | PEF                   | -0.46 (-3.05, 2.2)   | 7.32×10 <sup>-1</sup> |
| d_Bacteria;p_Firmicutes;c_Bacilli;o_Lactobacillales;f_Lactobacillaceae;g_Lactobacillus                   | FEF <sub>25-75</sub>  | -0.26 (-3.06, 2.61)  | 8.57×10 <sup>-1</sup> |
| d_Bacteria;p_Firmicutes;c_Bacilli;o_Lactobacillales;f_Lactobacillaceae;g_Lactobacillus                   | FEF <sub>25</sub>     | 0.06 (-2.6, 2.8)     | 9.63×10 <sup>-1</sup> |
| d_Bacteria;p_Firmicutes;c_Bacilli;o_Lactobacillales;f_Lactobacillaceae;g_Lactobacillus                   | FEF <sub>50</sub>     | -0.17 (-3.14, 2.9)   | 9.13×10 <sup>-1</sup> |
| d_Bacteria;p_Firmicutes;c_Bacilli;o_Lactobacillales;f_Lactobacillaceae;g_Lactobacillus                   | FEF <sub>75</sub>     | -0.36 (-3.93, 3.35)  | 8.47×10 <sup>-1</sup> |
| d_Bacteria;p_Firmicutes;c_Bacilli;o_Lactobacillales;f_Streptococcaceae;g_Streptococcus                   | FVC                   | 0.51 (-0.97, 2.01)   | 5.03×10 <sup>-1</sup> |
| d_Bacteria;p_Firmicutes;c_Bacilli;o_Lactobacillales;f_Streptococcaceae;g_Streptococcus                   | FEV <sub>1</sub>      | 1.26 (0.01, 2.52)    | 5.11×10 <sup>-2</sup> |
| d_Bacteria;p_Firmicutes;c_Bacilli;o_Lactobacillales;f_Streptococcaceae;g_Streptococcus                   | FEV <sub>1</sub> /FVC | 0.35 (-0.73, 1.45)   | 5.28×10 <sup>-1</sup> |
| d_Bacteria;p_Firmicutes;c_Bacilli;o_Lactobacillales;f_Streptococcaceae;g_Streptococcus                   | PEF                   | 1.14 (-2.02, 4.39)   | 4.86×10 <sup>-1</sup> |
| d_Bacteria;p_Firmicutes;c_Bacilli;o_Lactobacillales;f_Streptococcaceae;g_Streptococcus                   | FEF <sub>25-75</sub>  | 0.96 (-2.4, 4.43)    | 5.81×10 <sup>-1</sup> |
| d_Bacteria;p_Firmicutes;c_Bacilli;o_Lactobacillales;f_Streptococcaceae;g_Streptococcus                   | FEF <sub>25</sub>     | 1.8 (-1.47, 5.19)    | 2.87×10 <sup>-1</sup> |
| d_Bacteria;p_Firmicutes;c_Bacilli;o_Lactobacillales;f_Streptococcaceae;g_Streptococcus                   | FEF <sub>50</sub>     | 1.12 (-2.43, 4.79)   | 5.43×10 <sup>-1</sup> |
| d_Bacteria;p_Firmicutes;c_Bacilli;o_Lactobacillales;f_Streptococcaceae;g_Streptococcus                   | FEF <sub>75</sub>     | 0.38 (-3.83, 4.77)   | 8.64×10 <sup>-1</sup> |
| d_Bacteria;p_Proteobacteria;c_Alphaproteobacteria;o_Caulobacterales;f_Caulobacteraceae;g_Caulobacter     | FVC                   | -0.12 (-1.15, 0.92)  | 8.27×10 <sup>-1</sup> |
| d_Bacteria;p_Proteobacteria;c_Alphaproteobacteria;o_Caulobacterales;f_Caulobacteraceae;g_Caulobacter     | FEV <sub>1</sub>      | 0.41 (-0.43, 1.26)   | 3.41×10 <sup>-1</sup> |
| d_Bacteria;p_Proteobacteria;c_Alphaproteobacteria;o_Caulobacterales;f_Caulobacteraceae;g_Caulobacter     | FEV <sub>1</sub> /FVC | 0.43 (-0.39, 1.25)   | 3.09×10 <sup>-1</sup> |
| d_Bacteria;p_Proteobacteria;c_Alphaproteobacteria;o_Caulobacterales;f_Caulobacteraceae;g_Caulobacter     | PEF                   | 1.58 (-0.67, 3.88)   | 1.74×10 <sup>-1</sup> |
| d_Bacteria;p_Proteobacteria;c_Alphaproteobacteria;o_Caulobacterales;f_Caulobacteraceae;g_Caulobacter     | FEF <sub>25-75</sub>  | 1.93 (-0.52, 4.44)   | 1.28×10 <sup>-1</sup> |
| d_Bacteria;p_Proteobacteria;c_Alphaproteobacteria;o_Caulobacterales;f_Caulobacteraceae;g_Caulobacter     | FEF <sub>25</sub>     | 1.31 (-1, 3.67)      | 2.72×10 <sup>-1</sup> |
| d_Bacteria;p_Proteobacteria;c_Alphaproteobacteria;o_Caulobacterales;f_Caulobacteraceae;g_Caulobacter     | FEF <sub>50</sub>     | 1.66 (-0.95, 4.34)   | 2.18×10 <sup>-1</sup> |
| d_Bacteria;p_Proteobacteria;c_Alphaproteobacteria;o_Caulobacterales;f_Caulobacteraceae;g_Caulobacter     | FEF <sub>75</sub>     | 2.12 (-1.07, 5.42)   | 2.00×10 <sup>-1</sup> |
| d_Bacteria;p_Proteobacteria;c_Alphaproteobacteria;o_Rhizobiales;f_Beijerinckiaceae;g_Methylobacterium    | FVC                   | -0.31 (-1.82, 1.23)  | 6.95×10 <sup>-1</sup> |
| d_Bacteria;p_Proteobacteria;c_Alphaproteobacteria;o_Rhizobiales;f_Beijerinckiaceae;g_Methylobacterium    | FEV <sub>1</sub>      | 0.42 (-0.87, 1.72)   | 5.31×10 <sup>-1</sup> |
| d_Bacteria;p_Proteobacteria;c_Alphaproteobacteria;o_Rhizobiales;f_Beijerinckiaceae;g_Methylobacterium    | FEV <sub>1</sub> /FVC | 0.65 (-0.48, 1.8)    | 2.65×10 <sup>-1</sup> |
| d_Bacteria;p_Proteobacteria;c_Alphaproteobacteria;o_Rhizobiales;f_Beijerinckiaceae;g_Methylobacterium    | PEF                   | 2.04 (-1.23, 5.41)   | 2.28×10 <sup>-1</sup> |
| d_Bacteria;p_Proteobacteria;c_Alphaproteobacteria;o_Rhizobiales;f_Beijerinckiaceae;g_Methylobacterium    | FEF <sub>25-75</sub>  | 1.41 (-2.09, 5.03)   | 4.37×10 <sup>-1</sup> |
| d_Bacteria;p_Proteobacteria;c_Alphaproteobacteria;o_Rhizobiales;f_Beijerinckiaceae;g_Methylobacterium    | FEF <sub>25</sub>     | 0.89 (-2.49, 4.38)   | 6.12×10 <sup>-1</sup> |
| d_Bacteria;p_Proteobacteria;c_Alphaproteobacteria;o_Rhizobiales;f_Beijerinckiaceae;g_Methylobacterium    | FEF <sub>50</sub>     | 1.63 (-2.08, 5.47)   | 3.96×10 <sup>-1</sup> |
| d_Bacteria;p_Proteobacteria;c_Alphaproteobacteria;o_Rhizobiales;f_Beijerinckiaceae;g_Methylobacterium    | FEF <sub>75</sub>     | 2.48 (-1.98, 7.14)   | 2.83×10 <sup>-1</sup> |
| d_Bacteria;p_Proteobacteria;c_Alphaproteobacteria;o_Rhizobiales;f_Hyphomicrobiaceae;g_Hyphomicrobium     | FVC                   | 1.12 (-0.31, 2.58)   | 1.30×10 <sup>-1</sup> |
| d_Bacteria;p_Proteobacteria;c_Alphaproteobacteria;o_Rhizobiales;f_Hyphomicrobiaceae;g_Hyphomicrobium     | FEV <sub>1</sub>      | -0.49 (-1.69, 0.73)  | 4.30×10 <sup>-1</sup> |
| d_Bacteria;p_Proteobacteria;c_Alphaproteobacteria;o_Rhizobiales;f_Hyphomicrobiaceae;g_Hyphomicrobium     | FEV <sub>1</sub> /FVC | -1.36 (-2.4, -0.32)  | 1.25×10 <sup>-2</sup> |
| d_Bacteria;p_Proteobacteria;c_Alphaproteobacteria;o_Rhizobiales;f_Hyphomicrobiaceae;g_Hyphomicrobium     | PEF                   | -2.05 (-5.06, 1.06)  | 1.97×10 <sup>-1</sup> |
| d_Bacteria;p_Proteobacteria;c_Alphaproteobacteria;o_Rhizobiales;f_Hyphomicrobiaceae;g_Hyphomicrobium     | FEF <sub>25-75</sub>  | -3.92 (-7.01, -0.72) | 1.90×10 <sup>-2</sup> |
| d_Bacteria;p_Proteobacteria;c_Alphaproteobacteria;o_Rhizobiales;f_Hyphomicrobiaceae;g_Hyphomicrobium     | FEF <sub>25</sub>     | -3.27 (-6.27, -0.18) | 4.16×10 <sup>-2</sup> |
| d_Bacteria;p_Proteobacteria;c_Alphaproteobacteria;o_Rhizobiales;f_Hyphomicrobiaceae;g_Hyphomicrobium     | FEF <sub>50</sub>     | -3.78 (-7.07, -0.36) | 3.33×10 <sup>-2</sup> |
| d_Bacteria;p_Proteobacteria;c_Alphaproteobacteria;o_Rhizobiales;f_Hyphomicrobiaceae;g_Hyphomicrobium     | FEF <sub>75</sub>     | -5.58 (-9.42, -1.57) | 8.18×10 <sup>-3</sup> |
| d_Bacteria;p_Proteobacteria;c_Alphaproteobacteria;o_Rhizobiales;f_Pleomorphomonadaceae;g_Pleomorphomonas | FVC                   | 0.35 (-0.9, 1.62)    | 5.87×10 <sup>-1</sup> |
| d_Bacteria;p_Proteobacteria;c_Alphaproteobacteria;o_Rhizobiales;f_Pleomorphomonadaceae;g_Pleomorphomonas | FEV <sub>1</sub>      | -0.95 (-1.93, 0.05)  | 6.76×10 <sup>-2</sup> |
| d_Bacteria;p_Proteobacteria;c_Alphaproteobacteria;o_Rhizobiales;f_Pleomorphomonadaceae;g_Pleomorphomonas | FEV <sub>1</sub> /FVC | -1.19 (-2.13, -0.25) | 1.50×10 <sup>-2</sup> |
| d_Bacteria;p_Proteobacteria;c_Alphaproteobacteria;o_Rhizobiales;f_Pleomorphomonadaceae;g_Pleomorphomonas | PEF                   | -3.14 (-5.67, -0.54) | 2.08×10 <sup>-2</sup> |
| d_Bacteria;p_Proteobacteria;c_Alphaproteobacteria;o_Rhizobiales;f_Pleomorphomonadaceae;g_Pleomorphomonas | FEF <sub>25-75</sub>  | -3.04 (-5.82, -0.18) | 4.08×10 <sup>-2</sup> |
| d_Bacteria;p_Proteobacteria;c_Alphaproteobacteria;o_Rhizobiales;f_Pleomorphomonadaceae;g_Pleomorphomonas | FEF <sub>25</sub>     | -2.46 (-5.11, 0.27)  | 8.14×10 <sup>-2</sup> |
| d_Bacteria;p_Proteobacteria;c_Alphaproteobacteria;o_Rhizobiales;f_Pleomorphomonadaceae;g_Pleomorphomonas | FEF <sub>50</sub>     | -2.8 (-5.78, 0.28)   | 7.81×10 <sup>-2</sup> |
| d_Bacteria;p_Proteobacteria;c_Alphaproteobacteria;o_Rhizobiales;f_Pleomorphomonadaceae;g_Pleomorphomonas | FEF <sub>75</sub>     | -4.82 (-8.29, -1.21) | 1.11×10 <sup>-2</sup> |
| d_Bacteria;p_Proteobacteria;c_Alphaproteobacteria;o_Rhizobiales;f_Rhizobiaceae;g_Allorhizobium           | FVC                   | 0.37 (-0.98, 1.75)   | 5.95×10 <sup>-1</sup> |
| d_Bacteria;p_Proteobacteria;c_Alphaproteobacteria;o_Rhizobiales;f_Rhizobiaceae;g_Allorhizobium           | FEV <sub>1</sub>      | 0.43 (-0.7, 1.57)    | 4.61×10 <sup>-1</sup> |

|                                                                                                              |                       |                     |                       |
|--------------------------------------------------------------------------------------------------------------|-----------------------|---------------------|-----------------------|
| d_Bacteria;p_Proteobacteria;c_Alphaproteobacteria;o_Rhizobiales;f_Rhizobiaceae;g_Allorhizobium               | FEV <sub>1</sub> /FVC | 0.12 (-0.92, 1.16)  | 8.26×10 <sup>-1</sup> |
| d_Bacteria;p_Proteobacteria;c_Alphaproteobacteria;o_Rhizobiales;f_Rhizobiaceae;g_Allorhizobium               | PEF                   | 2.09 (-0.87, 5.13)  | 1.72×10 <sup>-1</sup> |
| d_Bacteria;p_Proteobacteria;c_Alphaproteobacteria;o_Rhizobiales;f_Rhizobiaceae;g_Allorhizobium               | FEF <sub>25-75</sub>  | 1.9 (-1.27, 5.18)   | 2.46×10 <sup>-1</sup> |
| d_Bacteria;p_Proteobacteria;c_Alphaproteobacteria;o_Rhizobiales;f_Rhizobiaceae;g_Allorhizobium               | FEF <sub>25</sub>     | 1.35 (-1.69, 4.49)  | 3.91×10 <sup>-1</sup> |
| d_Bacteria;p_Proteobacteria;c_Alphaproteobacteria;o_Rhizobiales;f_Rhizobiaceae;g_Allorhizobium               | FEF <sub>50</sub>     | 2.43 (-0.93, 5.91)  | 1.61×10 <sup>-1</sup> |
| d_Bacteria;p_Proteobacteria;c_Alphaproteobacteria;o_Rhizobiales;f_Rhizobiaceae;g_Allorhizobium               | FEF <sub>75</sub>     | 0.98 (-3.05, 5.17)  | 6.40×10 <sup>-1</sup> |
| d_Bacteria;p_Proteobacteria;c_Alphaproteobacteria;o_Rhizobiales;f_Rhizobiales_Incertae_Sedis;g_Phreatobacter | FVC                   | 0.73 (-0.59, 2.07)  | 2.83×10 <sup>-1</sup> |
| d_Bacteria;p_Proteobacteria;c_Alphaproteobacteria;o_Rhizobiales;f_Rhizobiales_Incertae_Sedis;g_Phreatobacter | FEV <sub>1</sub>      | 1.62 (0.6, 2.65)    | 2.80×10 <sup>-3</sup> |
| d_Bacteria;p_Proteobacteria;c_Alphaproteobacteria;o_Rhizobiales;f_Rhizobiales_Incertae_Sedis;g_Phreatobacter | FEV <sub>1</sub> /FVC | 0.35 (-0.67, 1.39)  | 5.01×10 <sup>-1</sup> |
| d_Bacteria;p_Proteobacteria;c_Alphaproteobacteria;o_Rhizobiales;f_Rhizobiales_Incertae_Sedis;g_Phreatobacter | PEF                   | 2.96 (0.12, 5.87)   | 4.46×10 <sup>-2</sup> |
| d_Bacteria;p_Proteobacteria;c_Alphaproteobacteria;o_Rhizobiales;f_Rhizobiales_Incertae_Sedis;g_Phreatobacter | FEF <sub>25-75</sub>  | 3 (-0.06, 6.16)     | 5.88×10 <sup>-2</sup> |
| d_Bacteria;p_Proteobacteria;c_Alphaproteobacteria;o_Rhizobiales;f_Rhizobiales_Incertae_Sedis;g_Phreatobacter | FEF <sub>25</sub>     | 3.51 (0.62, 6.48)   | 1.96×10 <sup>-2</sup> |
| d_Bacteria;p_Proteobacteria;c_Alphaproteobacteria;o_Rhizobiales;f_Rhizobiales_Incertae_Sedis;g_Phreatobacter | FEF <sub>50</sub>     | 3.12 (-0.15, 6.49)  | 6.59×10 <sup>-2</sup> |
| d_Bacteria;p_Proteobacteria;c_Alphaproteobacteria;o_Rhizobiales;f_Rhizobiales_Incertae_Sedis;g_Phreatobacter | FEF <sub>75</sub>     | 2.05 (-1.94, 6.2)   | 3.23×10 <sup>-1</sup> |
| d_Bacteria;p_Proteobacteria;c_Alphaproteobacteria;o_Rhizobiales;f_Xanthobacteraceae;g_Bradyrhizobium         | FVC                   | 0.62 (-0.65, 1.89)  | 3.44×10 <sup>-1</sup> |
| d_Bacteria;p_Proteobacteria;c_Alphaproteobacteria;o_Rhizobiales;f_Xanthobacteraceae;g_Bradyrhizobium         | FEV <sub>1</sub>      | 0.86 (-0.17, 1.9)   | 1.08×10 <sup>-1</sup> |
| d_Bacteria;p_Proteobacteria;c_Alphaproteobacteria;o_Rhizobiales;f_Xanthobacteraceae;g_Bradyrhizobium         | FEV <sub>1</sub> /FVC | 0.13 (-0.87, 1.13)  | 8.07×10 <sup>-1</sup> |
| d_Bacteria;p_Proteobacteria;c_Alphaproteobacteria;o_Rhizobiales;f_Xanthobacteraceae;g_Bradyrhizobium         | PEF                   | 1.33 (-1.46, 4.2)   | 3.55×10 <sup>-1</sup> |
| d_Bacteria;p_Proteobacteria;c_Alphaproteobacteria;o_Rhizobiales;f_Xanthobacteraceae;g_Bradyrhizobium         | FEF <sub>25-75</sub>  | 1.05 (-1.98, 4.17)  | 5.04×10 <sup>-1</sup> |
| d_Bacteria;p_Proteobacteria;c_Alphaproteobacteria;o_Rhizobiales;f_Xanthobacteraceae;g_Bradyrhizobium         | FEF <sub>25</sub>     | 0.69 (-2.17, 3.63)  | 6.41×10 <sup>-1</sup> |
| d_Bacteria;p_Proteobacteria;c_Alphaproteobacteria;o_Rhizobiales;f_Xanthobacteraceae;g_Bradyrhizobium         | FEF <sub>50</sub>     | 0.72 (-2.48, 4.03)  | 6.64×10 <sup>-1</sup> |
| d_Bacteria;p_Proteobacteria;c_Alphaproteobacteria;o_Rhizobiales;f_Xanthobacteraceae;g_Bradyrhizobium         | FEF <sub>75</sub>     | 1.3 (-2.59, 5.36)   | 5.19×10 <sup>-1</sup> |
| d_Bacteria;p_Proteobacteria;c_Alphaproteobacteria;o_Rhizobiales;f_Xanthobacteraceae;g_Pseudolabrys           | FVC                   | 0.77 (-0.45, 2.01)  | 2.23×10 <sup>-1</sup> |
| d_Bacteria;p_Proteobacteria;c_Alphaproteobacteria;o_Rhizobiales;f_Xanthobacteraceae;g_Pseudolabrys           | FEV <sub>1</sub>      | 0.06 (-0.97, 1.11)  | 9.07×10 <sup>-1</sup> |
| d_Bacteria;p_Proteobacteria;c_Alphaproteobacteria;o_Rhizobiales;f_Xanthobacteraceae;g_Pseudolabrys           | FEV <sub>1</sub> /FVC | -0.61 (-1.53, 0.31) | 1.96×10 <sup>-1</sup> |
| d_Bacteria;p_Proteobacteria;c_Alphaproteobacteria;o_Rhizobiales;f_Xanthobacteraceae;g_Pseudolabrys           | PEF                   | 0.85 (-1.84, 3.6)   | 5.42×10 <sup>-1</sup> |
| d_Bacteria;p_Proteobacteria;c_Alphaproteobacteria;o_Rhizobiales;f_Xanthobacteraceae;g_Pseudolabrys           | FEF <sub>25-75</sub>  | -0.21 (-3.06, 2.72) | 8.85×10 <sup>-1</sup> |
| d_Bacteria;p_Proteobacteria;c_Alphaproteobacteria;o_Rhizobiales;f_Xanthobacteraceae;g_Pseudolabrys           | FEF <sub>25</sub>     | -0.64 (-3.37, 2.16) | 6.52×10 <sup>-1</sup> |
| d_Bacteria;p_Proteobacteria;c_Alphaproteobacteria;o_Rhizobiales;f_Xanthobacteraceae;g_Pseudolabrys           | FEF <sub>50</sub>     | -0.11 (-3.13, 3)    | 9.43×10 <sup>-1</sup> |
| d_Bacteria;p_Proteobacteria;c_Alphaproteobacteria;o_Rhizobiales;f_Xanthobacteraceae;g_Pseudolabrys           | FEF <sub>75</sub>     | -1.37 (-4.93, 2.31) | 4.61×10 <sup>-1</sup> |
| d_Bacteria;p_Proteobacteria;c_Alphaproteobacteria;o_Rhizobiales;f_Xanthobacteraceae;g_Rhodopseudomonas       | FVC                   | 0.88 (-0.35, 2.14)  | 1.67×10 <sup>-1</sup> |
| d_Bacteria;p_Proteobacteria;c_Alphaproteobacteria;o_Rhizobiales;f_Xanthobacteraceae;g_Rhodopseudomonas       | FEV <sub>1</sub>      | 0.07 (-0.96, 1.11)  | 8.98×10 <sup>-1</sup> |
| d_Bacteria;p_Proteobacteria;c_Alphaproteobacteria;o_Rhizobiales;f_Xanthobacteraceae;g_Rhodopseudomonas       | FEV <sub>1</sub> /FVC | -0.71 (-1.67, 0.26) | 1.57×10 <sup>-1</sup> |
| d_Bacteria;p_Proteobacteria;c_Alphaproteobacteria;o_Rhizobiales;f_Xanthobacteraceae;g_Rhodopseudomonas       | PEF                   | -0.37 (-3.11, 2.45) | 7.97×10 <sup>-1</sup> |
| d_Bacteria;p_Proteobacteria;c_Alphaproteobacteria;o_Rhizobiales;f_Xanthobacteraceae;g_Rhodopseudomonas       | FEF <sub>25-75</sub>  | -2.33 (-5.19, 0.61) | 1.24×10 <sup>-1</sup> |
| d_Bacteria;p_Proteobacteria;c_Alphaproteobacteria;o_Rhizobiales;f_Xanthobacteraceae;g_Rhodopseudomonas       | FEF <sub>25</sub>     | -1.66 (-4.4, 1.16)  | 2.51×10 <sup>-1</sup> |
| d_Bacteria;p_Proteobacteria;c_Alphaproteobacteria;o_Rhizobiales;f_Xanthobacteraceae;g_Rhodopseudomonas       | FEF <sub>50</sub>     | -2.72 (-5.72, 0.39) | 8.99×10 <sup>-2</sup> |
| d_Bacteria;p_Proteobacteria;c_Alphaproteobacteria;o_Rhizobiales;f_Xanthobacteraceae;g_Rhodopseudomonas       | FEF <sub>75</sub>     | -3.12 (-6.75, 0.65) | 1.08×10 <sup>-1</sup> |
| d_Bacteria;p_Proteobacteria;c_Alphaproteobacteria;o_Rhodobacterales;f_Rhodobacteraceae;g_Paracoccus          | FVC                   | 0.51 (-0.8, 1.84)   | 4.52×10 <sup>-1</sup> |
| d_Bacteria;p_Proteobacteria;c_Alphaproteobacteria;o_Rhodobacterales;f_Rhodobacteraceae;g_Paracoccus          | FEV <sub>1</sub>      | 1.47 (0.43, 2.52)   | 7.12×10 <sup>-3</sup> |
| d_Bacteria;p_Proteobacteria;c_Alphaproteobacteria;o_Rhodobacterales;f_Rhodobacteraceae;g_Paracoccus          | FEV <sub>1</sub> /FVC | 0.5 (-0.49, 1.51)   | 3.27×10 <sup>-1</sup> |
| d_Bacteria;p_Proteobacteria;c_Alphaproteobacteria;o_Rhodobacterales;f_Rhodobacteraceae;g_Paracoccus          | PEF                   | 4 (1.26, 6.82)      | 5.22×10 <sup>-3</sup> |
| d_Bacteria;p_Proteobacteria;c_Alphaproteobacteria;o_Rhodobacterales;f_Rhodobacteraceae;g_Paracoccus          | FEF <sub>25-75</sub>  | 2.85 (-0.18, 5.97)  | 6.93×10 <sup>-2</sup> |
| d_Bacteria;p_Proteobacteria;c_Alphaproteobacteria;o_Rhodobacterales;f_Rhodobacteraceae;g_Paracoccus          | FEF <sub>25</sub>     | 3.83 (0.99, 6.74)   | 9.63×10 <sup>-3</sup> |
| d_Bacteria;p_Proteobacteria;c_Alphaproteobacteria;o_Rhodobacterales;f_Rhodobacteraceae;g_Paracoccus          | FEF <sub>50</sub>     | 3.13 (-0.08, 6.44)  | 5.99×10 <sup>-2</sup> |
| d_Bacteria;p_Proteobacteria;c_Alphaproteobacteria;o_Rhodobacterales;f_Rhodobacteraceae;g_Paracoccus          | FEF <sub>75</sub>     | 2.11 (-1.8, 6.17)   | 2.98×10 <sup>-1</sup> |
| d_Bacteria;p_Proteobacteria;c_Alphaproteobacteria;o_Sphingomonadales;f_Sphingomonadaceae;g_Novosphingobium   | FVC                   | 1.04 (-0.19, 2.29)  | 1.04×10 <sup>-1</sup> |

|                                                                                                               |                       |                      |                       |
|---------------------------------------------------------------------------------------------------------------|-----------------------|----------------------|-----------------------|
| d_Bacteria;p_Proteobacteria;c_Alphaproteobacteria;o_Sphingomonadales;f_Sphingomonadaceae;g_Novosphingobium    | FEV <sub>1</sub>      | 0.39 (-0.64, 1.42)   | 4.63×10 <sup>-1</sup> |
| d_Bacteria;p_Proteobacteria;c_Alphaproteobacteria;o_Sphingomonadales;f_Sphingomonadaceae;g_Novosphingobium    | FEV <sub>1</sub> /FVC | -0.48 (-1.43, 0.48)  | 3.26×10 <sup>-1</sup> |
| d_Bacteria;p_Proteobacteria;c_Alphaproteobacteria;o_Sphingomonadales;f_Sphingomonadaceae;g_Novosphingobium    | PEF                   | 0.91 (-1.8, 3.69)    | 5.17×10 <sup>-1</sup> |
| d_Bacteria;p_Proteobacteria;c_Alphaproteobacteria;o_Sphingomonadales;f_Sphingomonadaceae;g_Novosphingobium    | FEF <sub>25-75</sub>  | 0.53 (-2.37, 3.52)   | 7.23×10 <sup>-1</sup> |
| d_Bacteria;p_Proteobacteria;c_Alphaproteobacteria;o_Sphingomonadales;f_Sphingomonadaceae;g_Novosphingobium    | FEF <sub>25</sub>     | 0.32 (-2.44, 3.16)   | 8.22×10 <sup>-1</sup> |
| d_Bacteria;p_Proteobacteria;c_Alphaproteobacteria;o_Sphingomonadales;f_Sphingomonadaceae;g_Novosphingobium    | FEF <sub>50</sub>     | 0.79 (-2.29, 3.98)   | 6.19×10 <sup>-1</sup> |
| d_Bacteria;p_Proteobacteria;c_Alphaproteobacteria;o_Sphingomonadales;f_Sphingomonadaceae;g_Novosphingobium    | FEF <sub>75</sub>     | -0.41 (-4.08, 3.4)   | 8.31×10 <sup>-1</sup> |
| d_Bacteria;p_Proteobacteria;c_Alphaproteobacteria;o_Sphingomonadales;f_Sphingomonadaceae;g_Sphingomonas       | FVC                   | 1.22 (-0.08, 2.54)   | 7.04×10 <sup>-2</sup> |
| d_Bacteria;p_Proteobacteria;c_Alphaproteobacteria;o_Sphingomonadales;f_Sphingomonadaceae;g_Sphingomonas       | FEV <sub>1</sub>      | 0.21 (-0.87, 1.3)    | 7.04×10 <sup>-1</sup> |
| d_Bacteria;p_Proteobacteria;c_Alphaproteobacteria;o_Sphingomonadales;f_Sphingomonadaceae;g_Sphingomonas       | FEV <sub>1</sub> /FVC | -1.32 (-2.31, -0.31) | 1.21×10 <sup>-2</sup> |
| d_Bacteria;p_Proteobacteria;c_Alphaproteobacteria;o_Sphingomonadales;f_Sphingomonadaceae;g_Sphingomonas       | PEF                   | 0.24 (-2.63, 3.19)   | 8.75×10 <sup>-1</sup> |
| d_Bacteria;p_Proteobacteria;c_Alphaproteobacteria;o_Sphingomonadales;f_Sphingomonadaceae;g_Sphingomonas       | FEF <sub>25-75</sub>  | -1.82 (-4.84, 1.3)   | 2.54×10 <sup>-1</sup> |
| d_Bacteria;p_Proteobacteria;c_Alphaproteobacteria;o_Sphingomonadales;f_Sphingomonadaceae;g_Sphingomonas       | FEF <sub>25</sub>     | -0.91 (-3.8, 2.08)   | 5.49×10 <sup>-1</sup> |
| d_Bacteria;p_Proteobacteria;c_Alphaproteobacteria;o_Sphingomonadales;f_Sphingomonadaceae;g_Sphingomonas       | FEF <sub>50</sub>     | -1.73 (-4.94, 1.59)  | 3.07×10 <sup>-1</sup> |
| d_Bacteria;p_Proteobacteria;c_Alphaproteobacteria;o_Sphingomonadales;f_Sphingomonadaceae;g_Sphingomonas       | FEF <sub>75</sub>     | -3.54 (-7.32, 0.4)   | 8.15×10 <sup>-2</sup> |
| d_Bacteria;p_Proteobacteria;c_Gammaproteobacteria;o_Aeromonadales;f_Aeromonadaceae;g_Tolomonas                | FVC                   | 0.68 (-0.46, 1.82)   | 2.47×10 <sup>-1</sup> |
| d_Bacteria;p_Proteobacteria;c_Gammaproteobacteria;o_Aeromonadales;f_Aeromonadaceae;g_Tolomonas                | FEV <sub>1</sub>      | -0.83 (-1.73, 0.07)  | 7.61×10 <sup>-2</sup> |
| d_Bacteria;p_Proteobacteria;c_Gammaproteobacteria;o_Aeromonadales;f_Aeromonadaceae;g_Tolomonas                | FEV <sub>1</sub> /FVC | -1.15 (-1.95, -0.34) | 6.59×10 <sup>-3</sup> |
| d_Bacteria;p_Proteobacteria;c_Gammaproteobacteria;o_Aeromonadales;f_Aeromonadaceae;g_Tolomonas                | PEF                   | -1.15 (-3.52, 1.28)  | 3.52×10 <sup>-1</sup> |
| d_Bacteria;p_Proteobacteria;c_Gammaproteobacteria;o_Aeromonadales;f_Aeromonadaceae;g_Tolomonas                | FEF <sub>25-75</sub>  | -2.92 (-5.34, -0.43) | 2.40×10 <sup>-2</sup> |
| d_Bacteria;p_Proteobacteria;c_Gammaproteobacteria;o_Aeromonadales;f_Aeromonadaceae;g_Tolomonas                | FEF <sub>25</sub>     | -1.43 (-3.86, 1.06)  | 2.60×10 <sup>-1</sup> |
| d_Bacteria;p_Proteobacteria;c_Gammaproteobacteria;o_Aeromonadales;f_Aeromonadaceae;g_Tolomonas                | FEF <sub>50</sub>     | -3 (-5.57, -0.37)    | 2.84×10 <sup>-2</sup> |
| d_Bacteria;p_Proteobacteria;c_Gammaproteobacteria;o_Aeromonadales;f_Aeromonadaceae;g_Tolomonas                | FEF <sub>75</sub>     | -4.17 (-7.19, -1.05) | 1.07×10 <sup>-2</sup> |
| d_Bacteria;p_Proteobacteria;c_Gammaproteobacteria;o_Betaproteobacteriales;f_Burkholderiaceae;g_Acidovorax     | FVC                   | 0.26 (-1.14, 1.68)   | 7.16×10 <sup>-1</sup> |
| d_Bacteria;p_Proteobacteria;c_Gammaproteobacteria;o_Betaproteobacteriales;f_Burkholderiaceae;g_Acidovorax     | FEV <sub>1</sub>      | 0.26 (-0.9, 1.43)    | 6.68×10 <sup>-1</sup> |
| d_Bacteria;p_Proteobacteria;c_Gammaproteobacteria;o_Betaproteobacteriales;f_Burkholderiaceae;g_Acidovorax     | FEV <sub>1</sub> /FVC | -0.11 (-1.2, 0.98)   | 8.38×10 <sup>-1</sup> |
| d_Bacteria;p_Proteobacteria;c_Gammaproteobacteria;o_Betaproteobacteriales;f_Burkholderiaceae;g_Acidovorax     | PEF                   | -2.32 (-5.26, 0.71)  | 1.37×10 <sup>-1</sup> |
| d_Bacteria;p_Proteobacteria;c_Gammaproteobacteria;o_Betaproteobacteriales;f_Burkholderiaceae;g_Acidovorax     | FEF <sub>25-75</sub>  | -1.24 (-4.47, 2.1)   | 4.65×10 <sup>-1</sup> |
| d_Bacteria;p_Proteobacteria;c_Gammaproteobacteria;o_Betaproteobacteriales;f_Burkholderiaceae;g_Acidovorax     | FEF <sub>25</sub>     | -1.71 (-4.76, 1.44)  | 2.86×10 <sup>-1</sup> |
| d_Bacteria;p_Proteobacteria;c_Gammaproteobacteria;o_Betaproteobacteriales;f_Burkholderiaceae;g_Acidovorax     | FEF <sub>50</sub>     | -0.89 (-4.33, 2.68)  | 6.22×10 <sup>-1</sup> |
| d_Bacteria;p_Proteobacteria;c_Gammaproteobacteria;o_Betaproteobacteriales;f_Burkholderiaceae;g_Acidovorax     | FEF <sub>75</sub>     | -1.13 (-5.27, 3.19)  | 6.03×10 <sup>-1</sup> |
| d_Bacteria;p_Proteobacteria;c_Gammaproteobacteria;o_Betaproteobacteriales;f_Burkholderiaceae;g_Aquabacterium  | FVC                   | 0.47 (-0.71, 1.67)   | 4.40×10 <sup>-1</sup> |
| d_Bacteria;p_Proteobacteria;c_Gammaproteobacteria;o_Betaproteobacteriales;f_Burkholderiaceae;g_Aquabacterium  | FEV <sub>1</sub>      | -0.28 (-1.26, 0.71)  | 5.77×10 <sup>-1</sup> |
| d_Bacteria;p_Proteobacteria;c_Gammaproteobacteria;o_Betaproteobacteriales;f_Burkholderiaceae;g_Aquabacterium  | FEV <sub>1</sub> /FVC | -0.46 (-1.36, 0.46)  | 3.28×10 <sup>-1</sup> |
| d_Bacteria;p_Proteobacteria;c_Gammaproteobacteria;o_Betaproteobacteriales;f_Burkholderiaceae;g_Aquabacterium  | PEF                   | -1.93 (-4.43, 0.62)  | 1.41×10 <sup>-1</sup> |
| d_Bacteria;p_Proteobacteria;c_Gammaproteobacteria;o_Betaproteobacteriales;f_Burkholderiaceae;g_Aquabacterium  | FEF <sub>25-75</sub>  | -1.58 (-4.27, 1.19)  | 2.66×10 <sup>-1</sup> |
| d_Bacteria;p_Proteobacteria;c_Gammaproteobacteria;o_Betaproteobacteriales;f_Burkholderiaceae;g_Aquabacterium  | FEF <sub>25</sub>     | -1.82 (-4.38, 0.81)  | 1.78×10 <sup>-1</sup> |
| d_Bacteria;p_Proteobacteria;c_Gammaproteobacteria;o_Betaproteobacteriales;f_Burkholderiaceae;g_Aquabacterium  | FEF <sub>50</sub>     | -2.08 (-4.91, 0.83)  | 1.64×10 <sup>-1</sup> |
| d_Bacteria;p_Proteobacteria;c_Gammaproteobacteria;o_Betaproteobacteriales;f_Burkholderiaceae;g_Aquabacterium  | FEF <sub>75</sub>     | -1.59 (-5.04, 1.99)  | 3.82×10 <sup>-1</sup> |
| d_Bacteria;p_Proteobacteria;c_Gammaproteobacteria;o_Betaproteobacteriales;f_Burkholderiaceae;g_Hydrogenophaga | FVC                   | 1.65 (0.14, 3.19)    | 3.51×10 <sup>-2</sup> |
| d_Bacteria;p_Proteobacteria;c_Gammaproteobacteria;o_Betaproteobacteriales;f_Burkholderiaceae;g_Hydrogenophaga | FEV <sub>1</sub>      | -0.35 (-1.62, 0.94)  | 5.94×10 <sup>-1</sup> |
| d_Bacteria;p_Proteobacteria;c_Gammaproteobacteria;o_Betaproteobacteriales;f_Burkholderiaceae;g_Hydrogenophaga | FEV <sub>1</sub> /FVC | -1.54 (-2.59, -0.47) | 5.79×10 <sup>-3</sup> |
| d_Bacteria;p_Proteobacteria;c_Gammaproteobacteria;o_Betaproteobacteriales;f_Burkholderiaceae;g_Hydrogenophaga | PEF                   | -4.57 (-7.48, -1.56) | 4.01×10 <sup>-3</sup> |
| d_Bacteria;p_Proteobacteria;c_Gammaproteobacteria;o_Betaproteobacteriales;f_Burkholderiaceae;g_Hydrogenophaga | FEF <sub>25-75</sub>  | -4.34 (-7.49, -1.07) | 1.11×10 <sup>-2</sup> |
| d_Bacteria;p_Proteobacteria;c_Gammaproteobacteria;o_Betaproteobacteriales;f_Burkholderiaceae;g_Hydrogenophaga | FEF <sub>25</sub>     | -4.72 (-7.73, -1.61) | 4.09×10 <sup>-3</sup> |
| d_Bacteria;p_Proteobacteria;c_Gammaproteobacteria;o_Betaproteobacteriales;f_Burkholderiaceae;g_Hydrogenophaga | FEF <sub>50</sub>     | -4.66 (-7.97, -1.23) | 9.43×10 <sup>-3</sup> |
| d_Bacteria;p_Proteobacteria;c_Gammaproteobacteria;o_Betaproteobacteriales;f_Burkholderiaceae;g_Hydrogenophaga | FEF <sub>75</sub>     | -4.46 (-8.49, -0.26) | 4.02×10 <sup>-2</sup> |

|                                                                                                            |                       |                      |                       |
|------------------------------------------------------------------------------------------------------------|-----------------------|----------------------|-----------------------|
| d_Bacteria;p_Proteobacteria;c_Gammaproteobacteria;o_Betaproteobacteriales;f_Burkholderiaceae;g_Massilia    | FVC                   | 0.79 (-1.13, 2.75)   | 4.24×10 <sup>-1</sup> |
| d_Bacteria;p_Proteobacteria;c_Gammaproteobacteria;o_Betaproteobacteriales;f_Burkholderiaceae;g_Massilia    | FEV <sub>1</sub>      | 2.37 (0.84, 3.92)    | 3.28×10 <sup>-3</sup> |
| d_Bacteria;p_Proteobacteria;c_Gammaproteobacteria;o_Betaproteobacteriales;f_Burkholderiaceae;g_Massilia    | FEV <sub>1</sub> /FVC | 1.14 (-0.31, 2.61)   | 1.28×10 <sup>-1</sup> |
| d_Bacteria;p_Proteobacteria;c_Gammaproteobacteria;o_Betaproteobacteriales;f_Burkholderiaceae;g_Massilia    | PEF                   | 4.3 (0.14, 8.63)     | 4.60×10 <sup>-2</sup> |
| d_Bacteria;p_Proteobacteria;c_Gammaproteobacteria;o_Betaproteobacteriales;f_Burkholderiaceae;g_Massilia    | FEF <sub>25-75</sub>  | 5.03 (0.54, 9.72)    | 3.05×10 <sup>-2</sup> |
| d_Bacteria;p_Proteobacteria;c_Gammaproteobacteria;o_Betaproteobacteriales;f_Burkholderiaceae;g_Massilia    | FEF <sub>25</sub>     | 3.49 (-0.81, 7.98)   | 1.17×10 <sup>-1</sup> |
| d_Bacteria;p_Proteobacteria;c_Gammaproteobacteria;o_Betaproteobacteriales;f_Burkholderiaceae;g_Massilia    | FEF <sub>50</sub>     | 4.44 (-0.33, 9.43)   | 7.19×10 <sup>-2</sup> |
| d_Bacteria;p_Proteobacteria;c_Gammaproteobacteria;o_Betaproteobacteriales;f_Burkholderiaceae;g_Massilia    | FEF <sub>75</sub>     | 6.2 (0.41, 12.33)    | 3.84×10 <sup>-2</sup> |
| d_Bacteria;p_Proteobacteria;c_Gammaproteobacteria;o_Betaproteobacteriales;f_Burkholderiaceae;g_Ralstonia   | FVC                   | -0.04 (-1.31, 1.25)  | 9.53×10 <sup>-1</sup> |
| d_Bacteria;p_Proteobacteria;c_Gammaproteobacteria;o_Betaproteobacteriales;f_Burkholderiaceae;g_Ralstonia   | FEV <sub>1</sub>      | 0.85 (-0.18, 1.9)    | 1.12×10 <sup>-1</sup> |
| d_Bacteria;p_Proteobacteria;c_Gammaproteobacteria;o_Betaproteobacteriales;f_Burkholderiaceae;g_Ralstonia   | FEV <sub>1</sub> /FVC | 0.71 (-0.26, 1.69)   | 1.56×10 <sup>-1</sup> |
| d_Bacteria;p_Proteobacteria;c_Gammaproteobacteria;o_Betaproteobacteriales;f_Burkholderiaceae;g_Ralstonia   | PEF                   | 2.61 (-0.12, 5.42)   | 6.52×10 <sup>-2</sup> |
| d_Bacteria;p_Proteobacteria;c_Gammaproteobacteria;o_Betaproteobacteriales;f_Burkholderiaceae;g_Ralstonia   | FEF <sub>25-75</sub>  | 3.42 (0.48, 6.46)    | 2.51×10 <sup>-2</sup> |
| d_Bacteria;p_Proteobacteria;c_Gammaproteobacteria;o_Betaproteobacteriales;f_Burkholderiaceae;g_Ralstonia   | FEF <sub>25</sub>     | 2.55 (-0.27, 5.44)   | 8.05×10 <sup>-2</sup> |
| d_Bacteria;p_Proteobacteria;c_Gammaproteobacteria;o_Betaproteobacteriales;f_Burkholderiaceae;g_Ralstonia   | FEF <sub>50</sub>     | 3.38 (0.25, 6.61)    | 3.73×10 <sup>-2</sup> |
| d_Bacteria;p_Proteobacteria;c_Gammaproteobacteria;o_Betaproteobacteriales;f_Burkholderiaceae;g_Ralstonia   | FEF <sub>75</sub>     | 3.94 (0.11, 7.91)    | 4.68×10 <sup>-2</sup> |
| d_Bacteria;p_Proteobacteria;c_Gammaproteobacteria;o_Betaproteobacteriales;f_Burkholderiaceae;g_Tepidimonas | FVC                   | -0.57 (-2.24, 1.13)  | 5.11×10 <sup>-1</sup> |
| d_Bacteria;p_Proteobacteria;c_Gammaproteobacteria;o_Betaproteobacteriales;f_Burkholderiaceae;g_Tepidimonas | FEV <sub>1</sub>      | -0.51 (-1.92, 0.92)  | 4.84×10 <sup>-1</sup> |
| d_Bacteria;p_Proteobacteria;c_Gammaproteobacteria;o_Betaproteobacteriales;f_Burkholderiaceae;g_Tepidimonas | FEV <sub>1</sub> /FVC | 0.38 (-0.87, 1.64)   | 5.59×10 <sup>-1</sup> |
| d_Bacteria;p_Proteobacteria;c_Gammaproteobacteria;o_Betaproteobacteriales;f_Burkholderiaceae;g_Tepidimonas | PEF                   | -1.19 (-4.73, 2.48)  | 5.22×10 <sup>-1</sup> |
| d_Bacteria;p_Proteobacteria;c_Gammaproteobacteria;o_Betaproteobacteriales;f_Burkholderiaceae;g_Tepidimonas | FEF <sub>25-75</sub>  | -0.15 (-3.96, 3.82)  | 9.41×10 <sup>-1</sup> |
| d_Bacteria;p_Proteobacteria;c_Gammaproteobacteria;o_Betaproteobacteriales;f_Burkholderiaceae;g_Tepidimonas | FEF <sub>25</sub>     | 0.2 (-3.53, 4.07)    | 9.19×10 <sup>-1</sup> |
| d_Bacteria;p_Proteobacteria;c_Gammaproteobacteria;o_Betaproteobacteriales;f_Burkholderiaceae;g_Tepidimonas | FEF <sub>50</sub>     | -0.76 (-4.75, 3.4)   | 7.17×10 <sup>-1</sup> |
| d_Bacteria;p_Proteobacteria;c_Gammaproteobacteria;o_Betaproteobacteriales;f_Burkholderiaceae;g_Tepidimonas | FEF <sub>75</sub>     | 1.25 (-3.61, 6.36)   | 6.22×10 <sup>-1</sup> |
| d_Bacteria;p_Proteobacteria;c_Gammaproteobacteria;o_Betaproteobacteriales;f_Rhodocyclaceae;g_Dechloromonas | FVC                   | 1.08 (-0.21, 2.4)    | 1.07×10 <sup>-1</sup> |
| d_Bacteria;p_Proteobacteria;c_Gammaproteobacteria;o_Betaproteobacteriales;f_Rhodocyclaceae;g_Dechloromonas | FEV <sub>1</sub>      | -0.04 (-1.11, 1.06)  | 9.50×10 <sup>-1</sup> |
| d_Bacteria;p_Proteobacteria;c_Gammaproteobacteria;o_Betaproteobacteriales;f_Rhodocyclaceae;g_Dechloromonas | FEV <sub>1</sub> /FVC | -0.93 (-1.91, 0.06)  | 6.86×10 <sup>-2</sup> |
| d_Bacteria;p_Proteobacteria;c_Gammaproteobacteria;o_Betaproteobacteriales;f_Rhodocyclaceae;g_Dechloromonas | PEF                   | -3.96 (-6.54, -1.32) | 4.66×10 <sup>-3</sup> |
| d_Bacteria;p_Proteobacteria;c_Gammaproteobacteria;o_Betaproteobacteriales;f_Rhodocyclaceae;g_Dechloromonas | FEF <sub>25-75</sub>  | -2.26 (-5.21, 0.77)  | 1.47×10 <sup>-1</sup> |
| d_Bacteria;p_Proteobacteria;c_Gammaproteobacteria;o_Betaproteobacteriales;f_Rhodocyclaceae;g_Dechloromonas | FEF <sub>25</sub>     | -3.35 (-6.04, -0.59) | 2.06×10 <sup>-2</sup> |
| d_Bacteria;p_Proteobacteria;c_Gammaproteobacteria;o_Betaproteobacteriales;f_Rhodocyclaceae;g_Dechloromonas | FEF <sub>50</sub>     | -2.22 (-5.35, 1.03)  | 1.82×10 <sup>-1</sup> |
| d_Bacteria;p_Proteobacteria;c_Gammaproteobacteria;o_Betaproteobacteriales;f_Rhodocyclaceae;g_Dechloromonas | FEF <sub>75</sub>     | -2.79 (-6.55, 1.12)  | 1.63×10 <sup>-1</sup> |
| d_Bacteria;p_Proteobacteria;c_Gammaproteobacteria;o_Betaproteobacteriales;f_Rhodocyclaceae;g_Zoogloea      | FVC                   | -0.09 (-1.43, 1.27)  | 8.97×10 <sup>-1</sup> |
| d_Bacteria;p_Proteobacteria;c_Gammaproteobacteria;o_Betaproteobacteriales;f_Rhodocyclaceae;g_Zoogloea      | FEV <sub>1</sub>      | -0.29 (-1.39, 0.82)  | 6.09×10 <sup>-1</sup> |
| d_Bacteria;p_Proteobacteria;c_Gammaproteobacteria;o_Betaproteobacteriales;f_Rhodocyclaceae;g_Zoogloea      | FEV <sub>1</sub> /FVC | 0.15 (-0.91, 1.22)   | 7.80×10 <sup>-1</sup> |
| d_Bacteria;p_Proteobacteria;c_Gammaproteobacteria;o_Betaproteobacteriales;f_Rhodocyclaceae;g_Zoogloea      | PEF                   | -1.93 (-4.77, 0.99)  | 1.97×10 <sup>-1</sup> |
| d_Bacteria;p_Proteobacteria;c_Gammaproteobacteria;o_Betaproteobacteriales;f_Rhodocyclaceae;g_Zoogloea      | FEF <sub>25-75</sub>  | -0.81 (-3.95, 2.42)  | 6.20×10 <sup>-1</sup> |
| d_Bacteria;p_Proteobacteria;c_Gammaproteobacteria;o_Betaproteobacteriales;f_Rhodocyclaceae;g_Zoogloea      | FEF <sub>25</sub>     | -1.58 (-4.51, 1.44)  | 3.05×10 <sup>-1</sup> |
| d_Bacteria;p_Proteobacteria;c_Gammaproteobacteria;o_Betaproteobacteriales;f_Rhodocyclaceae;g_Zoogloea      | FEF <sub>50</sub>     | -0.99 (-4.31, 2.44)  | 5.69×10 <sup>-1</sup> |
| d_Bacteria;p_Proteobacteria;c_Gammaproteobacteria;o_Betaproteobacteriales;f_Rhodocyclaceae;g_Zoogloea      | FEF <sub>75</sub>     | 0.03 (-4.03, 4.27)   | 9.87×10 <sup>-1</sup> |
| d_Bacteria;p_Proteobacteria;c_Gammaproteobacteria;o_Enterobacteriales;f_Enterobacteriaceae;g_Klebsiella    | FVC                   | -1.45 (-2.87, -0.01) | 5.32×10 <sup>-2</sup> |
| d_Bacteria;p_Proteobacteria;c_Gammaproteobacteria;o_Enterobacteriales;f_Enterobacteriaceae;g_Klebsiella    | FEV <sub>1</sub>      | -0.39 (-1.59, 0.83)  | 5.31×10 <sup>-1</sup> |
| d_Bacteria;p_Proteobacteria;c_Gammaproteobacteria;o_Enterobacteriales;f_Enterobacteriaceae;g_Klebsiella    | FEV <sub>1</sub> /FVC | 0.93 (-0.21, 2.08)   | 1.15×10 <sup>-1</sup> |
| d_Bacteria;p_Proteobacteria;c_Gammaproteobacteria;o_Enterobacteriales;f_Enterobacteriaceae;g_Klebsiella    | PEF                   | -0.97 (-4.12, 2.28)  | 5.57×10 <sup>-1</sup> |
| d_Bacteria;p_Proteobacteria;c_Gammaproteobacteria;o_Enterobacteriales;f_Enterobacteriaceae;g_Klebsiella    | FEF <sub>25-75</sub>  | 1.85 (-1.62, 5.44)   | 3.04×10 <sup>-1</sup> |
| d_Bacteria;p_Proteobacteria;c_Gammaproteobacteria;o_Enterobacteriales;f_Enterobacteriaceae;g_Klebsiella    | FEF <sub>25</sub>     | 0.1 (-3.16, 3.47)    | 9.53×10 <sup>-1</sup> |
| d_Bacteria;p_Proteobacteria;c_Gammaproteobacteria;o_Enterobacteriales;f_Enterobacteriaceae;g_Klebsiella    | FEF <sub>50</sub>     | 1.4 (-2.27, 5.22)    | 4.62×10 <sup>-1</sup> |

|                                                                                                            |                       |                      |                       |
|------------------------------------------------------------------------------------------------------------|-----------------------|----------------------|-----------------------|
| d_Bacteria;p_Proteobacteria;c_Gammaproteobacteria;o_Enterobacteriales;f_Enterobacteriaceae;g_Klebsiella    | FEF <sub>75</sub>     | 4.34 (-0.17, 9.06)   | 6.32×10 <sup>-2</sup> |
| d_Bacteria;p_Proteobacteria;c_Gammaproteobacteria;o_Oceanospirillales;f_Halomonadaceae;g_Halomonas         | FVC                   | 1.53 (-0.14, 3.22)   | 7.65×10 <sup>-2</sup> |
| d_Bacteria;p_Proteobacteria;c_Gammaproteobacteria;o_Oceanospirillales;f_Halomonadaceae;g_Halomonas         | FEV <sub>1</sub>      | 1.87 (0.53, 3.24)    | 8.09×10 <sup>-3</sup> |
| d_Bacteria;p_Proteobacteria;c_Gammaproteobacteria;o_Oceanospirillales;f_Halomonadaceae;g_Halomonas         | FEV <sub>1</sub> /FVC | -0.08 (-1.34, 1.21)  | 9.07×10 <sup>-1</sup> |
| d_Bacteria;p_Proteobacteria;c_Gammaproteobacteria;o_Oceanospirillales;f_Halomonadaceae;g_Halomonas         | PEF                   | 3.42 (-0.2, 7.17)    | 6.79×10 <sup>-2</sup> |
| d_Bacteria;p_Proteobacteria;c_Gammaproteobacteria;o_Oceanospirillales;f_Halomonadaceae;g_Halomonas         | FEF <sub>25-75</sub>  | 1.56 (-2.34, 5.61)   | 4.40×10 <sup>-1</sup> |
| d_Bacteria;p_Proteobacteria;c_Gammaproteobacteria;o_Oceanospirillales;f_Halomonadaceae;g_Halomonas         | FEF <sub>25</sub>     | 3.65 (-0.08, 7.53)   | 5.89×10 <sup>-2</sup> |
| d_Bacteria;p_Proteobacteria;c_Gammaproteobacteria;o_Oceanospirillales;f_Halomonadaceae;g_Halomonas         | FEF <sub>50</sub>     | 1.42 (-2.71, 5.71)   | 5.09×10 <sup>-1</sup> |
| d_Bacteria;p_Proteobacteria;c_Gammaproteobacteria;o_Oceanospirillales;f_Halomonadaceae;g_Halomonas         | FEF <sub>75</sub>     | 0.84 (-4.07, 6)      | 7.42×10 <sup>-1</sup> |
| d_Bacteria;p_Proteobacteria;c_Gammaproteobacteria;o_Pseudomonadales;f_Moraxellaceae;g_Acinetobacter        | FVC                   | 1.37 (0.12, 2.64)    | 3.47×10 <sup>-2</sup> |
| d_Bacteria;p_Proteobacteria;c_Gammaproteobacteria;o_Pseudomonadales;f_Moraxellaceae;g_Acinetobacter        | FEV <sub>1</sub>      | 0.2 (-0.86, 1.27)    | 7.13×10 <sup>-1</sup> |
| d_Bacteria;p_Proteobacteria;c_Gammaproteobacteria;o_Pseudomonadales;f_Moraxellaceae;g_Acinetobacter        | FEV <sub>1</sub> /FVC | -0.9 (-1.83, 0.03)   | 6.09×10 <sup>-2</sup> |
| d_Bacteria;p_Proteobacteria;c_Gammaproteobacteria;o_Pseudomonadales;f_Moraxellaceae;g_Acinetobacter        | PEF                   | 0.8 (-1.93, 3.61)    | 5.72×10 <sup>-1</sup> |
| d_Bacteria;p_Proteobacteria;c_Gammaproteobacteria;o_Pseudomonadales;f_Moraxellaceae;g_Acinetobacter        | FEF <sub>25-75</sub>  | -2.27 (-5.07, 0.61)  | 1.25×10 <sup>-1</sup> |
| d_Bacteria;p_Proteobacteria;c_Gammaproteobacteria;o_Pseudomonadales;f_Moraxellaceae;g_Acinetobacter        | FEF <sub>25</sub>     | -0.03 (-2.82, 2.85)  | 9.85×10 <sup>-1</sup> |
| d_Bacteria;p_Proteobacteria;c_Gammaproteobacteria;o_Pseudomonadales;f_Moraxellaceae;g_Acinetobacter        | FEF <sub>50</sub>     | -2.54 (-5.49, 0.5)   | 1.05×10 <sup>-1</sup> |
| d_Bacteria;p_Proteobacteria;c_Gammaproteobacteria;o_Pseudomonadales;f_Moraxellaceae;g_Acinetobacter        | FEF <sub>75</sub>     | -4.09 (-7.53, -0.52) | 2.75×10 <sup>-2</sup> |
| d_Bacteria;p_Proteobacteria;c_Gammaproteobacteria;o_Pseudomonadales;f_Moraxellaceae;g_Enhydrobacter        | FVC                   | -0.57 (-1.98, 0.86)  | 4.36×10 <sup>-1</sup> |
| d_Bacteria;p_Proteobacteria;c_Gammaproteobacteria;o_Pseudomonadales;f_Moraxellaceae;g_Enhydrobacter        | FEV <sub>1</sub>      | -0.19 (-1.38, 1.02)  | 7.61×10 <sup>-1</sup> |
| d_Bacteria;p_Proteobacteria;c_Gammaproteobacteria;o_Pseudomonadales;f_Moraxellaceae;g_Enhydrobacter        | FEV <sub>1</sub> /FVC | 0.05 (-1.04, 1.14)   | 9.33×10 <sup>-1</sup> |
| d_Bacteria;p_Proteobacteria;c_Gammaproteobacteria;o_Pseudomonadales;f_Moraxellaceae;g_Enhydrobacter        | PEF                   | 0.51 (-2.57, 3.69)   | 7.49×10 <sup>-1</sup> |
| d_Bacteria;p_Proteobacteria;c_Gammaproteobacteria;o_Pseudomonadales;f_Moraxellaceae;g_Enhydrobacter        | FEF <sub>25-75</sub>  | -0.73 (-4, 2.65)     | 6.69×10 <sup>-1</sup> |
| d_Bacteria;p_Proteobacteria;c_Gammaproteobacteria;o_Pseudomonadales;f_Moraxellaceae;g_Enhydrobacter        | FEF <sub>25</sub>     | 0.87 (-2.31, 4.15)   | 5.98×10 <sup>-1</sup> |
| d_Bacteria;p_Proteobacteria;c_Gammaproteobacteria;o_Pseudomonadales;f_Moraxellaceae;g_Enhydrobacter        | FEF <sub>50</sub>     | -1.33 (-4.77, 2.23)  | 4.61×10 <sup>-1</sup> |
| d_Bacteria;p_Proteobacteria;c_Gammaproteobacteria;o_Pseudomonadales;f_Moraxellaceae;g_Enhydrobacter        | FEF <sub>75</sub>     | -0.65 (-4.8, 3.68)   | 7.65×10 <sup>-1</sup> |
| d_Bacteria;p_Proteobacteria;c_Gammaproteobacteria;o_Pseudomonadales;f_Pseudomonadaceae;g_Pseudomonas       | FVC                   | -5.37 (-8.58, -2.06) | 2.55×10 <sup>-3</sup> |
| d_Bacteria;p_Proteobacteria;c_Gammaproteobacteria;o_Pseudomonadales;f_Pseudomonadaceae;g_Pseudomonas       | FEV <sub>1</sub>      | -2.96 (-5.77, -0.07) | 4.94×10 <sup>-2</sup> |
| d_Bacteria;p_Proteobacteria;c_Gammaproteobacteria;o_Pseudomonadales;f_Pseudomonadaceae;g_Pseudomonas       | FEV <sub>1</sub> /FVC | 2.43 (-0.48, 5.43)   | 1.07×10 <sup>-1</sup> |
| d_Bacteria;p_Proteobacteria;c_Gammaproteobacteria;o_Pseudomonadales;f_Pseudomonadaceae;g_Pseudomonas       | PEF                   | 2.2 (-5.83, 10.91)   | 6.04×10 <sup>-1</sup> |
| d_Bacteria;p_Proteobacteria;c_Gammaproteobacteria;o_Pseudomonadales;f_Pseudomonadaceae;g_Pseudomonas       | FEF <sub>25-75</sub>  | 2.19 (-6.48, 11.66)  | 6.34×10 <sup>-1</sup> |
| d_Bacteria;p_Proteobacteria;c_Gammaproteobacteria;o_Pseudomonadales;f_Pseudomonadaceae;g_Pseudomonas       | FEF <sub>25</sub>     | 3.24 (-5.01, 12.19)  | 4.56×10 <sup>-1</sup> |
| d_Bacteria;p_Proteobacteria;c_Gammaproteobacteria;o_Pseudomonadales;f_Pseudomonadaceae;g_Pseudomonas       | FEF <sub>50</sub>     | 2.75 (-6.5, 12.91)   | 5.74×10 <sup>-1</sup> |
| d_Bacteria;p_Proteobacteria;c_Gammaproteobacteria;o_Pseudomonadales;f_Pseudomonadaceae;g_Pseudomonas       | FEF <sub>75</sub>     | 3.91 (-7.34, 16.52)  | 5.14×10 <sup>-1</sup> |
| d_Bacteria;p_Proteobacteria;c_Gammaproteobacteria;o_Vibrionales;f_Vibrionaceae;g_Vibrio                    | FVC                   | 0.22 (-1.5, 1.98)    | 8.02×10 <sup>-1</sup> |
| d_Bacteria;p_Proteobacteria;c_Gammaproteobacteria;o_Vibrionales;f_Vibrionaceae;g_Vibrio                    | FEV <sub>1</sub>      | 0.71 (-0.73, 2.17)   | 3.41×10 <sup>-1</sup> |
| d_Bacteria;p_Proteobacteria;c_Gammaproteobacteria;o_Vibrionales;f_Vibrionaceae;g_Vibrio                    | FEV <sub>1</sub> /FVC | -0.06 (-1.36, 1.26)  | 9.28×10 <sup>-1</sup> |
| d_Bacteria;p_Proteobacteria;c_Gammaproteobacteria;o_Vibrionales;f_Vibrionaceae;g_Vibrio                    | PEF                   | -0.05 (-3.76, 3.81)  | 9.80×10 <sup>-1</sup> |
| d_Bacteria;p_Proteobacteria;c_Gammaproteobacteria;o_Vibrionales;f_Vibrionaceae;g_Vibrio                    | FEF <sub>25-75</sub>  | -1.46 (-5.37, 2.61)  | 4.78×10 <sup>-1</sup> |
| d_Bacteria;p_Proteobacteria;c_Gammaproteobacteria;o_Vibrionales;f_Vibrionaceae;g_Vibrio                    | FEF <sub>25</sub>     | 0.36 (-3.48, 4.35)   | 8.58×10 <sup>-1</sup> |
| d_Bacteria;p_Proteobacteria;c_Gammaproteobacteria;o_Vibrionales;f_Vibrionaceae;g_Vibrio                    | FEF <sub>50</sub>     | -1.84 (-5.95, 2.44)  | 3.96×10 <sup>-1</sup> |
| d_Bacteria;p_Proteobacteria;c_Gammaproteobacteria;o_Vibrionales;f_Vibrionaceae;g_Vibrio                    | FEF <sub>75</sub>     | -1.38 (-6.3, 3.81)   | 5.97×10 <sup>-1</sup> |
| d_Bacteria;p_Proteobacteria;c_Gammaproteobacteria;o_Xanthomonadales;f_Xanthomonadaceae;g_Pseudoxanthomonas | FVC                   | 0.59 (-0.75, 1.95)   | 3.90×10 <sup>-1</sup> |
| d_Bacteria;p_Proteobacteria;c_Gammaproteobacteria;o_Xanthomonadales;f_Xanthomonadaceae;g_Pseudoxanthomonas | FEV <sub>1</sub>      | -0.52 (-1.62, 0.59)  | 3.62×10 <sup>-1</sup> |
| d_Bacteria;p_Proteobacteria;c_Gammaproteobacteria;o_Xanthomonadales;f_Xanthomonadaceae;g_Pseudoxanthomonas | FEV <sub>1</sub> /FVC | -0.7 (-1.7, 0.3)     | 1.74×10 <sup>-1</sup> |
| d_Bacteria;p_Proteobacteria;c_Gammaproteobacteria;o_Xanthomonadales;f_Xanthomonadaceae;g_Pseudoxanthomonas | PEF                   | -1.48 (-4.29, 1.42)  | 3.17×10 <sup>-1</sup> |
| d_Bacteria;p_Proteobacteria;c_Gammaproteobacteria;o_Xanthomonadales;f_Xanthomonadaceae;g_Pseudoxanthomonas | FEF <sub>25-75</sub>  | -1.9 (-4.89, 1.19)   | 2.29×10 <sup>-1</sup> |
| d_Bacteria;p_Proteobacteria;c_Gammaproteobacteria;o_Xanthomonadales;f_Xanthomonadaceae;g_Pseudoxanthomonas | FEF <sub>25</sub>     | -1.63 (-4.52, 1.34)  | 2.82×10 <sup>-1</sup> |

|                                                                                                            |                       |                     |                       |
|------------------------------------------------------------------------------------------------------------|-----------------------|---------------------|-----------------------|
| d_Bacteria;p_Proteobacteria;c_Gammaproteobacteria;o_Xanthomonadales;f_Xanthomonadaceae;g_Pseudoxanthomonas | FEF <sub>50</sub>     | -1.22 (-4.43, 2.11) | 4.71×10 <sup>-1</sup> |
| d_Bacteria;p_Proteobacteria;c_Gammaproteobacteria;o_Xanthomonadales;f_Xanthomonadaceae;g_Pseudoxanthomonas | FEF <sub>75</sub>     | -2.41 (-6.21, 1.53) | 2.30×10 <sup>-1</sup> |
| d_Fungi;p_Ascomycota;c_Dothideomycetes;o_Capnodiales;f_Mycosphaerellaceae;g_Mycosphaerella                 | FVC                   | 1.27 (0.09, 2.45)   | 3.78×10 <sup>-2</sup> |
| d_Fungi;p_Ascomycota;c_Dothideomycetes;o_Capnodiales;f_Mycosphaerellaceae;g_Mycosphaerella                 | FEV <sub>1</sub>      | 0.89 (-0.09, 1.87)  | 7.96×10 <sup>-2</sup> |
| d_Fungi;p_Ascomycota;c_Dothideomycetes;o_Capnodiales;f_Mycosphaerellaceae;g_Mycosphaerella                 | FEV <sub>1</sub> /FVC | -0.38 (-1.29, 0.55) | 4.26×10 <sup>-1</sup> |
| d_Fungi;p_Ascomycota;c_Dothideomycetes;o_Capnodiales;f_Mycosphaerellaceae;g_Mycosphaerella                 | PEF                   | 0.19 (-2.42, 2.86)  | 8.91×10 <sup>-1</sup> |
| d_Fungi;p_Ascomycota;c_Dothideomycetes;o_Capnodiales;f_Mycosphaerellaceae;g_Mycosphaerella                 | FEF <sub>25-75</sub>  | 1.21 (-1.6, 4.11)   | 4.04×10 <sup>-1</sup> |
| d_Fungi;p_Ascomycota;c_Dothideomycetes;o_Capnodiales;f_Mycosphaerellaceae;g_Mycosphaerella                 | FEF <sub>25</sub>     | 0.42 (-2.26, 3.17)  | 7.63×10 <sup>-1</sup> |
| d_Fungi;p_Ascomycota;c_Dothideomycetes;o_Capnodiales;f_Mycosphaerellaceae;g_Mycosphaerella                 | FEF <sub>50</sub>     | 1.91 (-1.08, 4.98)  | 2.17×10 <sup>-1</sup> |
| d_Fungi;p_Ascomycota;c_Dothideomycetes;o_Capnodiales;f_Mycosphaerellaceae;g_Mycosphaerella                 | FEF <sub>75</sub>     | 0.27 (-3.31, 3.97)  | 8.86×10 <sup>-1</sup> |
| d_Fungi;p_Ascomycota;c_Dothideomycetes;o_Pleosporales;f_Didymellaceae;g_Calophoma                          | FVC                   | 0.71 (-0.49, 1.93)  | 2.50×10 <sup>-1</sup> |
| d_Fungi;p_Ascomycota;c_Dothideomycetes;o_Pleosporales;f_Didymellaceae;g_Calophoma                          | FEV <sub>1</sub>      | 0.63 (-0.36, 1.63)  | 2.17×10 <sup>-1</sup> |
| d_Fungi;p_Ascomycota;c_Dothideomycetes;o_Pleosporales;f_Didymellaceae;g_Calophoma                          | FEV <sub>1</sub> /FVC | -0.14 (-1.1, 0.82)  | 7.68×10 <sup>-1</sup> |
| d_Fungi;p_Ascomycota;c_Dothideomycetes;o_Pleosporales;f_Didymellaceae;g_Calophoma                          | PEF                   | 0.86 (-1.81, 3.6)   | 5.34×10 <sup>-1</sup> |
| d_Fungi;p_Ascomycota;c_Dothideomycetes;o_Pleosporales;f_Didymellaceae;g_Calophoma                          | FEF <sub>25-75</sub>  | 2.13 (-0.74, 5.09)  | 1.52×10 <sup>-1</sup> |
| d_Fungi;p_Ascomycota;c_Dothideomycetes;o_Pleosporales;f_Didymellaceae;g_Calophoma                          | FEF <sub>25</sub>     | 1.01 (-1.72, 3.82)  | 4.74×10 <sup>-1</sup> |
| d_Fungi;p_Ascomycota;c_Dothideomycetes;o_Pleosporales;f_Didymellaceae;g_Calophoma                          | FEF <sub>50</sub>     | 2.48 (-0.58, 5.63)  | 1.17×10 <sup>-1</sup> |
| d_Fungi;p_Ascomycota;c_Dothideomycetes;o_Pleosporales;f_Didymellaceae;g_Calophoma                          | FEF <sub>75</sub>     | 1.81 (-1.9, 5.65)   | 3.47×10 <sup>-1</sup> |
| d_Fungi;p_Ascomycota;c_Dothideomycetes;o_Pleosporales;f_Pleosporaceae;g_Alternaria                         | FVC                   | 0.54 (-1.09, 2.19)  | 5.21×10 <sup>-1</sup> |
| d_Fungi;p_Ascomycota;c_Dothideomycetes;o_Pleosporales;f_Pleosporaceae;g_Alternaria                         | FEV <sub>1</sub>      | 0.89 (-0.45, 2.26)  | 1.98×10 <sup>-1</sup> |
| d_Fungi;p_Ascomycota;c_Dothideomycetes;o_Pleosporales;f_Pleosporaceae;g_Alternaria                         | FEV <sub>1</sub> /FVC | 0.15 (-1.09, 1.41)  | 8.14×10 <sup>-1</sup> |
| d_Fungi;p_Ascomycota;c_Dothideomycetes;o_Pleosporales;f_Pleosporaceae;g_Alternaria                         | PEF                   | 0.19 (-3.33, 3.83)  | 9.19×10 <sup>-1</sup> |
| d_Fungi;p_Ascomycota;c_Dothideomycetes;o_Pleosporales;f_Pleosporaceae;g_Alternaria                         | FEF <sub>25-75</sub>  | 0.73 (-3.06, 4.66)  | 7.12×10 <sup>-1</sup> |
| d_Fungi;p_Ascomycota;c_Dothideomycetes;o_Pleosporales;f_Pleosporaceae;g_Alternaria                         | FEF <sub>25</sub>     | 0.04 (-3.57, 3.79)  | 9.81×10 <sup>-1</sup> |
| d_Fungi;p_Ascomycota;c_Dothideomycetes;o_Pleosporales;f_Pleosporaceae;g_Alternaria                         | FEF <sub>50</sub>     | 0.57 (-3.43, 4.73)  | 7.85×10 <sup>-1</sup> |
| d_Fungi;p_Ascomycota;c_Dothideomycetes;o_Pleosporales;f_Pleosporaceae;g_Alternaria                         | FEF <sub>75</sub>     | 1.33 (-3.49, 6.39)  | 5.97×10 <sup>-1</sup> |
| d_Fungi;p_Ascomycota;c_Eurotiomycetes;o_Eurotiales;f_Aspergillaceae;g_Aspergillus                          | FVC                   | 0.39 (-0.79, 1.59)  | 5.18×10 <sup>-1</sup> |
| d_Fungi;p_Ascomycota;c_Eurotiomycetes;o_Eurotiales;f_Aspergillaceae;g_Aspergillus                          | FEV <sub>1</sub>      | 0.47 (-0.5, 1.46)   | 3.47×10 <sup>-1</sup> |
| d_Fungi;p_Ascomycota;c_Eurotiomycetes;o_Eurotiales;f_Aspergillaceae;g_Aspergillus                          | FEV <sub>1</sub> /FVC | 0.1 (-0.81, 1.01)   | 8.36×10 <sup>-1</sup> |
| d_Fungi;p_Ascomycota;c_Eurotiomycetes;o_Eurotiales;f_Aspergillaceae;g_Aspergillus                          | PEF                   | 1.01 (-1.57, 3.65)  | 4.50×10 <sup>-1</sup> |
| d_Fungi;p_Ascomycota;c_Eurotiomycetes;o_Eurotiales;f_Aspergillaceae;g_Aspergillus                          | FEF <sub>25-75</sub>  | 1.14 (-1.63, 3.98)  | 4.26×10 <sup>-1</sup> |
| d_Fungi;p_Ascomycota;c_Eurotiomycetes;o_Eurotiales;f_Aspergillaceae;g_Aspergillus                          | FEF <sub>25</sub>     | 1.13 (-1.52, 3.85)  | 4.09×10 <sup>-1</sup> |
| d_Fungi;p_Ascomycota;c_Eurotiomycetes;o_Eurotiales;f_Aspergillaceae;g_Aspergillus                          | FEF <sub>50</sub>     | 1.26 (-1.67, 4.28)  | 4.06×10 <sup>-1</sup> |
| d_Fungi;p_Ascomycota;c_Eurotiomycetes;o_Eurotiales;f_Aspergillaceae;g_Aspergillus                          | FEF <sub>75</sub>     | 0.58 (-2.93, 4.22)  | 7.49×10 <sup>-1</sup> |
| d_Fungi;p_Ascomycota;c_Eurotiomycetes;o_Eurotiales;f_Aspergillaceae;g_Penicillium                          | FVC                   | -0.06 (-1.12, 1.02) | 9.18×10 <sup>-1</sup> |
| d_Fungi;p_Ascomycota;c_Eurotiomycetes;o_Eurotiales;f_Aspergillaceae;g_Penicillium                          | FEV <sub>1</sub>      | 0.49 (-0.39, 1.39)  | 2.80×10 <sup>-1</sup> |
| d_Fungi;p_Ascomycota;c_Eurotiomycetes;o_Eurotiales;f_Aspergillaceae;g_Penicillium                          | FEV <sub>1</sub> /FVC | 0.54 (-0.28, 1.37)  | 1.99×10 <sup>-1</sup> |
| d_Fungi;p_Ascomycota;c_Eurotiomycetes;o_Eurotiales;f_Aspergillaceae;g_Penicillium                          | PEF                   | 3.57 (1.31, 5.89)   | 2.57×10 <sup>-3</sup> |
| d_Fungi;p_Ascomycota;c_Eurotiomycetes;o_Eurotiales;f_Aspergillaceae;g_Penicillium                          | FEF <sub>25-75</sub>  | 2.05 (-0.45, 4.62)  | 1.13×10 <sup>-1</sup> |
| d_Fungi;p_Ascomycota;c_Eurotiomycetes;o_Eurotiales;f_Aspergillaceae;g_Penicillium                          | FEF <sub>25</sub>     | 2.64 (0.26, 5.07)   | 3.24×10 <sup>-2</sup> |
| d_Fungi;p_Ascomycota;c_Eurotiomycetes;o_Eurotiales;f_Aspergillaceae;g_Penicillium                          | FEF <sub>50</sub>     | 2.61 (-0.05, 5.34)  | 5.82×10 <sup>-2</sup> |
| d_Fungi;p_Ascomycota;c_Eurotiomycetes;o_Eurotiales;f_Aspergillaceae;g_Penicillium                          | FEF <sub>75</sub>     | 1.3 (-1.91, 4.62)   | 4.34×10 <sup>-1</sup> |
| d_Fungi;p_Ascomycota;c_Eurotiomycetes;o_Eurotiales;f_Trichocomaceae;g_Talaromyces                          | FVC                   | 0.55 (-0.7, 1.81)   | 3.91×10 <sup>-1</sup> |
| d_Fungi;p_Ascomycota;c_Eurotiomycetes;o_Eurotiales;f_Trichocomaceae;g_Talaromyces                          | FEV <sub>1</sub>      | -0.46 (-1.51, 0.6)  | 3.93×10 <sup>-1</sup> |
| d_Fungi;p_Ascomycota;c_Eurotiomycetes;o_Eurotiales;f_Trichocomaceae;g_Talaromyces                          | FEV <sub>1</sub> /FVC | -0.82 (-1.74, 0.12) | 8.97×10 <sup>-2</sup> |
| d_Fungi;p_Ascomycota;c_Eurotiomycetes;o_Eurotiales;f_Trichocomaceae;g_Talaromyces                          | PEF                   | -1.29 (-3.93, 1.43) | 3.52×10 <sup>-1</sup> |
| d_Fungi;p_Ascomycota;c_Eurotiomycetes;o_Eurotiales;f_Trichocomaceae;g_Talaromyces                          | FEF <sub>25-75</sub>  | -2.28 (-5.05, 0.57) | 1.19×10 <sup>-1</sup> |

|                                                                                           |                       |                      |                       |
|-------------------------------------------------------------------------------------------|-----------------------|----------------------|-----------------------|
| d_Fungi;p_Ascomycota;c_Eurotiomycetes;o_Eurotiales;f_Trichocomaceae;g_Talaromyces         | FEF <sub>25</sub>     | -1.67 (-4.37, 1.11)  | 2.40×10 <sup>-1</sup> |
| d_Fungi;p_Ascomycota;c_Eurotiomycetes;o_Eurotiales;f_Trichocomaceae;g_Talaromyces         | FEF <sub>50</sub>     | -2.29 (-5.23, 0.74)  | 1.40×10 <sup>-1</sup> |
| d_Fungi;p_Ascomycota;c_Eurotiomycetes;o_Eurotiales;f_Trichocomaceae;g_Talaromyces         | FEF <sub>75</sub>     | -2.38 (-5.92, 1.3)   | 2.06×10 <sup>-1</sup> |
| d_Fungi;p_Ascomycota;c_Sordariomycetes;o_Hypocreales;f_Nectriaceae;g_Gibberella           | FVC                   | 0.37 (-1.02, 1.78)   | 6.08×10 <sup>-1</sup> |
| d_Fungi;p_Ascomycota;c_Sordariomycetes;o_Hypocreales;f_Nectriaceae;g_Gibberella           | FEV <sub>1</sub>      | 0.75 (-0.42, 1.93)   | 2.16×10 <sup>-1</sup> |
| d_Fungi;p_Ascomycota;c_Sordariomycetes;o_Hypocreales;f_Nectriaceae;g_Gibberella           | FEV <sub>1</sub> /FVC | 0.36 (-0.68, 1.4)    | 5.01×10 <sup>-1</sup> |
| d_Fungi;p_Ascomycota;c_Sordariomycetes;o_Hypocreales;f_Nectriaceae;g_Gibberella           | PEF                   | 2.78 (-0.19, 5.83)   | 7.05×10 <sup>-2</sup> |
| d_Fungi;p_Ascomycota;c_Sordariomycetes;o_Hypocreales;f_Nectriaceae;g_Gibberella           | FEF <sub>25-75</sub>  | 1.43 (-1.78, 4.73)   | 3.89×10 <sup>-1</sup> |
| d_Fungi;p_Ascomycota;c_Sordariomycetes;o_Hypocreales;f_Nectriaceae;g_Gibberella           | FEF <sub>25</sub>     | 3.32 (0.26, 6.48)    | 3.62×10 <sup>-2</sup> |
| d_Fungi;p_Ascomycota;c_Sordariomycetes;o_Hypocreales;f_Nectriaceae;g_Gibberella           | FEF <sub>50</sub>     | 1.04 (-2.33, 4.53)   | 5.51×10 <sup>-1</sup> |
| d_Fungi;p_Ascomycota;c_Sordariomycetes;o_Hypocreales;f_Nectriaceae;g_Gibberella           | FEF <sub>75</sub>     | 1.05 (-2.98, 5.24)   | 6.16×10 <sup>-1</sup> |
| d_Fungi;p_Basidiomycota;c_Agaricomycetes;o_Atheliales;f_Atheliaceae;g_Tylospora           | FVC                   | -1.62 (-3.26, 0.06)  | 6.22×10 <sup>-2</sup> |
| d_Fungi;p_Basidiomycota;c_Agaricomycetes;o_Atheliales;f_Atheliaceae;g_Tylospora           | FEV <sub>1</sub>      | -1.3 (-2.67, 0.1)    | 7.22×10 <sup>-2</sup> |
| d_Fungi;p_Basidiomycota;c_Agaricomycetes;o_Atheliales;f_Atheliaceae;g_Tylospora           | FEV <sub>1</sub> /FVC | 0.21 (-1.06, 1.51)   | 7.44×10 <sup>-1</sup> |
| d_Fungi;p_Basidiomycota;c_Agaricomycetes;o_Atheliales;f_Atheliaceae;g_Tylospora           | PEF                   | -2.39 (-5.91, 1.26)  | 2.00×10 <sup>-1</sup> |
| d_Fungi;p_Basidiomycota;c_Agaricomycetes;o_Atheliales;f_Atheliaceae;g_Tylospora           | FEF <sub>25-75</sub>  | -1.16 (-4.98, 2.82)  | 5.64×10 <sup>-1</sup> |
| d_Fungi;p_Basidiomycota;c_Agaricomycetes;o_Atheliales;f_Atheliaceae;g_Tylospora           | FEF <sub>25</sub>     | -2.78 (-6.38, 0.96)  | 1.47×10 <sup>-1</sup> |
| d_Fungi;p_Basidiomycota;c_Agaricomycetes;o_Atheliales;f_Atheliaceae;g_Tylospora           | FEF <sub>50</sub>     | -1.83 (-5.84, 2.35)  | 3.88×10 <sup>-1</sup> |
| d_Fungi;p_Basidiomycota;c_Agaricomycetes;o_Atheliales;f_Atheliaceae;g_Tylospora           | FEF <sub>75</sub>     | 0.71 (-4.22, 5.89)   | 7.82×10 <sup>-1</sup> |
| d_Fungi;p_Basidiomycota;c_Malasseziomycetes;o_Malasseziales;f_Malasseziaceae;g_Malassezia | FVC                   | -0.1 (-1.56, 1.38)   | 8.96×10 <sup>-1</sup> |
| d_Fungi;p_Basidiomycota;c_Malasseziomycetes;o_Malasseziales;f_Malasseziaceae;g_Malassezia | FEV <sub>1</sub>      | 0.97 (-0.23, 2.19)   | 1.18×10 <sup>-1</sup> |
| d_Fungi;p_Basidiomycota;c_Malasseziomycetes;o_Malasseziales;f_Malasseziaceae;g_Malassezia | FEV <sub>1</sub> /FVC | 1.1 (-0.02, 2.23)    | 5.71×10 <sup>-2</sup> |
| d_Fungi;p_Basidiomycota;c_Malasseziomycetes;o_Malasseziales;f_Malasseziaceae;g_Malassezia | PEF                   | -0.9 (-4.03, 2.33)   | 5.81×10 <sup>-1</sup> |
| d_Fungi;p_Basidiomycota;c_Malasseziomycetes;o_Malasseziales;f_Malasseziaceae;g_Malassezia | FEF <sub>25-75</sub>  | 1.8 (-1.65, 5.38)    | 3.13×10 <sup>-1</sup> |
| d_Fungi;p_Basidiomycota;c_Malasseziomycetes;o_Malasseziales;f_Malasseziaceae;g_Malassezia | FEF <sub>25</sub>     | -0.24 (-3.49, 3.11)  | 8.87×10 <sup>-1</sup> |
| d_Fungi;p_Basidiomycota;c_Malasseziomycetes;o_Malasseziales;f_Malasseziaceae;g_Malassezia | FEF <sub>50</sub>     | 2.05 (-1.62, 5.85)   | 2.81×10 <sup>-1</sup> |
| d_Fungi;p_Basidiomycota;c_Malasseziomycetes;o_Malasseziales;f_Malasseziaceae;g_Malassezia | FEF <sub>75</sub>     | 3.04 (-1.38, 7.65)   | 1.84×10 <sup>-1</sup> |
| d_Fungi;p_Basidiomycota;c_Wallemiomycetes;o_Wallemiales;f_Wallemiaceae;g_Wallemia         | FVC                   | 2.08 (-0.41, 4.63)   | 1.07×10 <sup>-1</sup> |
| d_Fungi;p_Basidiomycota;c_Wallemiomycetes;o_Wallemiales;f_Wallemiaceae;g_Wallemia         | FEV <sub>1</sub>      | 0.89 (-1.24, 3.07)   | 4.18×10 <sup>-1</sup> |
| d_Fungi;p_Basidiomycota;c_Wallemiomycetes;o_Wallemiales;f_Wallemiaceae;g_Wallemia         | FEV <sub>1</sub> /FVC | -1.23 (-3.01, 0.58)  | 1.86×10 <sup>-1</sup> |
| d_Fungi;p_Basidiomycota;c_Wallemiomycetes;o_Wallemiales;f_Wallemiaceae;g_Wallemia         | PEF                   | -2.8 (-7.87, 2.55)   | 3.02×10 <sup>-1</sup> |
| d_Fungi;p_Basidiomycota;c_Wallemiomycetes;o_Wallemiales;f_Wallemiaceae;g_Wallemia         | FEF <sub>25-75</sub>  | -4.16 (-9.44, 1.43)  | 1.45×10 <sup>-1</sup> |
| d_Fungi;p_Basidiomycota;c_Wallemiomycetes;o_Wallemiales;f_Wallemiaceae;g_Wallemia         | FEF <sub>25</sub>     | -3.76 (-8.95, 1.72)  | 1.78×10 <sup>-1</sup> |
| d_Fungi;p_Basidiomycota;c_Wallemiomycetes;o_Wallemiales;f_Wallemiaceae;g_Wallemia         | FEF <sub>50</sub>     | -5.12 (-10.61, 0.71) | 8.69×10 <sup>-2</sup> |
| d_Fungi;p_Basidiomycota;c_Wallemiomycetes;o_Wallemiales;f_Wallemiaceae;g_Wallemia         | FEF <sub>75</sub>     | -4.57 (-11.16, 2.51) | 2.03×10 <sup>-1</sup> |

Note: The regressions were only conducted for the high-abundant taxonomic genera present in at least 10 dormitory air samples with an average relative abundance > 0.3%. In total, 41 bacterial genera and 10 fungal genera were identified and analyzed. Percentage changes and 95% confidence intervals were calculated for per unit increase in the transformed relative abundance ( $\log_{10}(\text{relative abundance} * 10^5 + 1)$ ). Linear mixed-effect models were adjusted for age, gender, BMI, season, PM<sub>2.5</sub>, purification status (real or sham), temperature, relative humidity, and a random intercept for each participant. FVC, forced vital capacity; FEV<sub>1</sub>, forced expiratory volume in one second; PEF, peak expiratory flow; FEF<sub>25</sub>, forced expiratory flow at 25% of FVC; FEF<sub>50</sub>, forced expiratory flow at 50% of FVC; FEF<sub>75</sub>, forced expiratory flow at 75% of FVC; FEF<sub>25-75</sub>, forced expiratory flow from 25-75% of FVC; CIs, confidence intervals.



**Fig. S1.** Linear discriminant analysis (LDA) effect size (LEfSe) analysis on indoor airborne microbiome between the female and male dormitories. The cladogram of airborne bacterial (A) and fungal (B) community from LEfSe analysis. Differentially enriched taxa were identified according to at LDA score cutoff at 2. The blue circle represents significantly enriched taxa in female dormitories; the red circle represents significantly enriched taxa in male dormitories; and the white circle represents taxa with no significant differences between the two groups. The central circle represents the root of the tree (bacteria or fungi), and each ring represents the next lower taxonomic level (from phylum to genus).
